# Supplementary material for: Silver-catalyzed regioselective deuteration of (hetero)arenes and α-deuteration of 2-alkyl azaarenes
Source: Royal Society of Chemistry journal article supplement (doi:10.1039/d0ra02358b), 2020-01-01

## *Supplementary Information*

# **Silver-Catalyzed Regioselective Deuteration of (Hetero)Arenes and $\alpha$ -Deuteration of 2-Alkyl Azaarenes**

Baobiao Dong <sup>a,b</sup>, Xuefeng Cong <sup>\*.b</sup> and Na Hao <sup>\*.a</sup>

*<sup>a</sup>Department of Pharmaceutical Sciences, School of Pharmacy, Southwest Medical  
University, Luzhou 646000, China*

*<sup>b</sup>Jilin Province Key Laboratory of Organic Functional Molecular Design & Synthesis,  
Department of Chemistry, Northeast Normal University, Changchun 130024, China.*

## **Table of Contents**

|                                                                                                                                                  |            |
|--------------------------------------------------------------------------------------------------------------------------------------------------|------------|
| <b>1. General and Materials and Methods.....</b>                                                                                                 | <b>S2</b>  |
| <b>2. General Procedure for Silver-Catalyzed Regioselective Deuteration of<br/>(Hetero)Arenes Using D<sub>2</sub>O as Deuterium Source .....</b> | <b>S2</b>  |
| <b>3. Characterization of Synthesized Deuterated Products .....</b>                                                                              | <b>S3</b>  |
| <b>4. <sup>1</sup>H, and <sup>13</sup>C NMR Spectra .....</b>                                                                                    | <b>S16</b> |

## 1. General and Materials

**General.** All reactions dealing with air- or moisture-sensitive compounds were carried out in a flame-dried, sealed Schlenk reaction tube under an atmosphere of nitrogen. Flash silica gel column chromatography was performed on silica gel 60N (spherical and neutral, 140–325 mesh) as described by Still. NMR spectra were measured on a Bruker AV-500 spectrometer or a Bruker AV-400 spectrometer and reported in parts per million.  $^1\text{H}$  NMR spectra were recorded at 500 or 400 MHz in  $\text{CDCl}_3$  or  $\text{DMSO-}d_6$  were referenced internally to tetramethylsilane as a standard, and  $^{13}\text{C}$  NMR spectra were recorded at 126 or 100 MHz and referenced to the solvent resonance.

**Materials.** Unless otherwise noted, materials were purchased from Tokyo Chemical Industry Co., Aldrich Inc., Alfa Aesar, Adamas, and other commercial suppliers and used as received. Solvents were dried over sodium (for THF and ether) by refluxing for overnight and freshly distilled prior to use.

**Determination of Deuterium Content:** The amount of incorporated deuterium in a sample was quantified by the decrease of  $^1\text{H}$  NMR integral intensities at the specified positions compared to the starting material. Integral intensities were calibrated against hydrogen signals that do not undergo H/D-exchange.

## 2. General Procedure for Silver-Catalyzed Regioselective Deuteration of (Hetero)Arenes Using $\text{D}_2\text{O}$ as Deuterium Source

A dried Schlenk tube were placed aromatic compounds **1** or azaarenes **3** (0.5 mmol),  $\text{AgOTf}$  (3 mg, 0.025 mmol),  $\text{D}_2\text{O}$  (20 equiv) and  $\text{CDCl}_3$  (1.0 mL). The reaction mixture was heated at 90 °C for 18 h. The mixture was then cooled to room temperature, diluted with 5 mL of ethyl acetate, filtered through a celite pad, and washed with 5 mL of ethyl acetate. The combined organic extracts were concentrated under vacuum to give deuterated products. The deuterium incorporation was determined by  $^1\text{H}$  NMR.

### 3. Characterization of Synthesized Deuterated Products

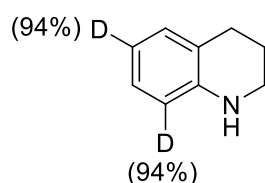

#### 1,2,3,4-Tetrahydroquinoline-6,8-d<sub>2</sub> (2a)

Colorless liquid; <sup>1</sup>H NMR (400 MHz, CDCl<sub>3</sub>) δ = 6.95-6.94 (m, 2H), 6.60 (t, *J* = 7.6 Hz, **0.06H**), 6.47 (d, *J* = 8.0 Hz, **0.06H**), 3.52 (brs, 1H), 3.26 (t, *J* = 5.6 Hz, 2H), 2.74 (t, *J* = 6.4 Hz, 2H), 1.96-1.90 (m, 2H); <sup>13</sup>C NMR (126 MHz, CDCl<sub>3</sub>): δ = 144.4, 129.3, 126.5, 126.4, 121.6, 117.1, 117.0, 116.8, 116.7, 114.3, 114.1, 114.0, 113.8, 41.8, 26.8, 22.0. Deuterium incorporation expected at δ 6.60 and 6.47. The level of deuterium incorporation was determined as 94% for δ 6.60 and 94% for δ 6.47 (<sup>1</sup>H NMR).

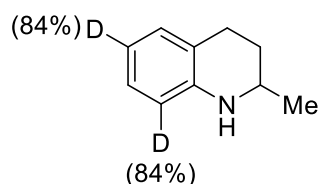

#### 2-Methyl-1,2,3,4-tetrahydroquinoline-6,8-d<sub>2</sub> (2b)

Colorless liquid; <sup>1</sup>H NMR (500 MHz, CDCl<sub>3</sub>) δ = 6.95 (m, 2H), 6.61 (t, *J* = 6.0 Hz, **0.16H**), 6.48 (d, *J* = 7.0 Hz, **0.16H**), 4.17 (brs, 1H), 3.39-3.36 (m, 1H), 2.82-2.72 (m, 2H), 1.93-1.90 (m, 1H), 1.59-1.57 (m, 1H), 1.19 (d, *J* = 5.0 Hz, 3H); <sup>13</sup>C NMR (126 MHz, CDCl<sub>3</sub>): δ = 144.0, 143.9, 129.2, 129.1, 126.6, 126.5, 126.4, 121.4, 117.44, 117.35, 117.2, 117.0, 114.4, 114.2, 114.1, 113.9, 47.2, 29.9, 26.4, 22.3. Deuterium incorporation expected at δ 6.61 and 6.48. The level of deuterium incorporation was determined as 84% for δ 6.61 and 84% for δ 6.48 (<sup>1</sup>H NMR).

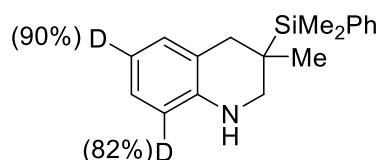

#### 3-(Dimethyl(phenyl)silyl)-3-methyl-1,2,3,4-tetrahydroquinoline-6,8-d<sub>2</sub> (2c)

Colorless liquid; <sup>1</sup>H NMR (500 MHz, CDCl<sub>3</sub>) δ = 7.53-7.52 (m, 2H), 7.38-7.34 (m, 3H), 6.95-6.91 (m, 2H), 6.60 (t, *J* = 6.0 Hz, **0.10H**), 6.45 (d, *J* = 6.0 Hz, **0.18H**), 3.98 (brs, 1H), 3.20 (d, *J* = 9.5 Hz, 1H), 2.92-2.87 (m, 2H), 2.32 (d, *J* = 13.5 Hz, 1H),

0.952 (s, 3H), 0.32-0.31 (m, 6H);  $^{13}\text{C}$  NMR (126 MHz,  $\text{CDCl}_3$ ):  $\delta$  = 143.44, 143.37, 136.5, 134.4, 133.0, 132.96, 130.0, 129.9, 129.6, 129.1, 127.9, 127.6, 126.4, 126.3, 120.4, 117.4, 114.1, 48.5, 34.9, 19.3, -6.1, -6.2. Deuterium incorporation expected at  $\delta$  6.60 and 6.45. The level of deuterium incorporation was determined as 90% for  $\delta$  6.60 and 82% for  $\delta$  6.45 ( $^1\text{H}$  NMR).

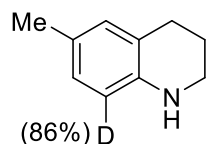

### 6-Methyl-1,2,3,4-tetrahydroquinoline-8-d (2d)

Colorless liquid;  $^1\text{H}$  NMR (500 MHz,  $\text{CDCl}_3$ )  $\delta$  = 6.78 (m, 2H), 6.44 (t,  $J$  = 7.0 Hz, **0.14H**), 4.35 (brs, 1H), 3.24 (t,  $J$  = 4.5 Hz, 2H), 2.70 (t,  $J$  = 5.5 Hz, 2H), 2.20, (s, 3H), 1.93-1.89 (m, 2H);  $^{13}\text{C}$  NMR (126 MHz,  $\text{CDCl}_3$ ):  $\delta$  = 141.1, 141.0, 130.0, 127.3, 127.23, 127.21, 127.20, 122.3, 1151.1, 115.0, 114.8, 114.7, 42.1, 26.7, 26.6, 22.1, 20.4. Deuterium incorporation expected at  $\delta$  6.44. The level of deuterium incorporation was determined as 86% ( $^1\text{H}$  NMR).

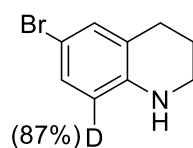

### 6-Bromo-1,2,3,4-tetrahydroquinoline-8-d (2e)

Yellowish liquid;  $^1\text{H}$  NMR (500 MHz,  $\text{CDCl}_3$ )  $\delta$  = 7.04-7.02 (m, 2H), 6.34 (d,  $J$  = 7.0 Hz, **0.13H**), 4.16 (brs, 1H), 3.25 (t,  $J$  = 4.5 Hz, 2H), 2.69 (t,  $J$  = 5.5 Hz, 2H), 1.91-1.87 (m, 2H);  $^{13}\text{C}$  NMR (126 MHz,  $\text{CDCl}_3$ ):  $\delta$  = 143.2, 143.1, 131.8, 129.3, 129.2, 123.6, 115.8, 115.7, 115.5, 115.3, 108.6, 41.7, 26.7, 21.5. Deuterium incorporation expected at  $\delta$  6.34. The level of deuterium incorporation was determined as 87% ( $^1\text{H}$  NMR).

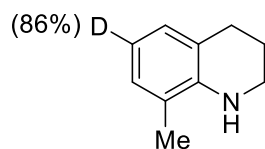

### 8-Methyl-1,2,3,4-tetrahydroquinoline-6-d (2f)

Colorless liquid;  $^1\text{H}$  NMR (500 MHz,  $\text{CDCl}_3$ )  $\delta$  = 6.87-6.84 (m, 2H), 6.56 (d,  $J$  = 6.5 Hz, **0.14H**), 3.77 (brs, 1H), 3.36 (t,  $J$  = 4.5 Hz, 2H), 2.77 (t,  $J$  = 5.0 Hz, 2H), 2.08 (s,

3H), 1.96-1.92 (m, 2H);  $^{13}\text{C}$  NMR (126 MHz,  $\text{CDCl}_3$ ):  $\delta = 142.3, 127.8, 127.7, 127.3, 127.2, 121.4, 121.1, 116.7, 116.6, 116.4, 116.2, 42.3, 27.2, 22.0, 17.6$ . Deuterium incorporation expected at  $\delta 6.56$ . The level of deuterium incorporation was determined as 86% ( $^1\text{H}$  NMR).

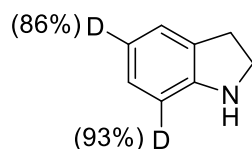

### Indoline-5,7-d<sub>2</sub> (2g)

Colorless liquid;  $^1\text{H}$  NMR (400 MHz,  $\text{CDCl}_3$ )  $\delta = 7.11$  (s, 1H), 7.01 (s, 1H), 6.69 (t,  $J = 7.6$  Hz, **0.14H**), 6.64 (d,  $J = 8.0$  Hz, **0.07H**), 3.49 (t,  $J = 8.0$  Hz, 2H), 2.99 (t,  $J = 8.4$  Hz, 2H);  $^{13}\text{C}$  NMR (100 MHz,  $\text{CDCl}_3$ ):  $\delta = 151.2, 129.4, 127.0, 126.9, 124.6, 124.5, 118.8, 118.7, 118.5, 118.4, 109.6, 109.5, 109.3, 109.2, 47.2, 29.7$ . Deuterium incorporation expected at  $\delta 6.69$  and 6.64. The level of deuterium incorporation was determined as 86% for  $\delta 6.69$  and 93% for  $\delta 6.64$  ( $^1\text{H}$  NMR).

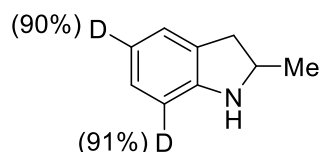

### 2-Methylindoline-5,7-d<sub>2</sub> (2h)

Colorless liquid;  $^1\text{H}$  NMR (500 MHz,  $\text{CDCl}_3$ )  $\delta = 7.06$  (s, 1H), 7.00 (s, 1H), 6.69 (t,  $J = 6.0$  Hz, **0.10H**), 6.61 (d,  $J = 6.0$  Hz, **0.09H**), 4.16 (brs, 1H), 3.98-3.95 (m, 1H), 3.13-3.09 (m, 1H), 2.63-2.59 (m, 1H), 1.26 (d,  $J = 5.5$  Hz, 3H);  $^{13}\text{C}$  NMR (126 MHz,  $\text{CDCl}_3$ ):  $\delta = 150.0, 129.1, 127.2, 127.1, 127.0, 124.7, 124.6, 119.0, 118.9, 118.8, 118.6, 109.6, 109.5, 109.4, 109.2, 55.2, 37.6, 21.9$ . Deuterium incorporation expected at  $\delta 6.69$  and 6.61. The level of deuterium incorporation was determined as 90% for  $\delta 6.69$  and 91% for  $\delta 6.64$  ( $^1\text{H}$  NMR).

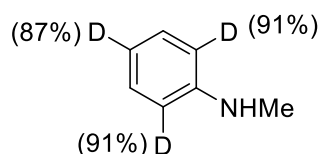

### N-methylbenzen-2,4,6-d<sub>3</sub>-amine (2i)

Yellowish liquid;  $^1\text{H}$  NMR (400 MHz,  $\text{CDCl}_3$ )  $\delta = 7.19$  (s, 1H), 6.70 (t,  $J = 7.2$  Hz, **0.13H**), 6.60 (d,  $J = 8.4$  Hz, **0.17H**), 2.80 (s, 3H);  $^{13}\text{C}$  NMR (100 MHz,  $\text{CDCl}_3$ ):  $\delta =$

149.0, 129.0, 128.9, 117.3, 117.2, 117.1, 116.9, 112.5, 112.4, 112.2, 112.1, 30.7. Deuterium incorporation expected at  $\delta$  6.70 and 6.60. The level of deuterium incorporation was determined as 87% for  $\delta$  6.70 and 91% ( $1-0.17/2 = 0.915$ ) for  $\delta$  6.60 ( $^1\text{H}$  NMR).

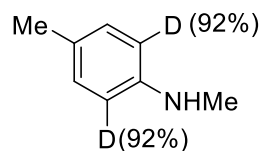

#### ***N*,4-dimethylbenzen-2,6-d<sub>2</sub>-amine (2j)**

Yellowish liquid;  $^1\text{H}$  NMR (500 MHz,  $\text{CDCl}_3$ )  $\delta$  = 6.99 (s, 2H), 6.53 (d,  $J$  = 7.0 Hz, **0.15H**), 2.78 (s, 1H), 2.24 (s, 3H);  $^{13}\text{C}$  NMR (126 MHz,  $\text{CDCl}_3$ ):  $\delta$  = 146.8, 129.6, 129.5, 126.5, 112.7, 112.6, 112.4, 112.2, 31.0, 20.3. Deuterium incorporation expected at  $\delta$  6.53. The level of deuterium incorporation was determined as 92% ( $1-0.15/2 = 0.925$ ) for  $\delta$  6.60 ( $^1\text{H}$  NMR).

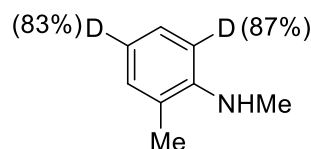

#### ***N*,2-dimethylbenzen-4,6-d<sub>2</sub>-amine (2k)**

Yellowish liquid;  $^1\text{H}$  NMR (500 MHz,  $\text{CDCl}_3$ )  $\delta$  = 7.15 (s, 1H), 7.05 (s, 1H), 6.67 (t,  $J$  = 6.0 Hz, **0.17H**), 6.62 (d,  $J$  = 6.5 Hz, **0.13H**), 3.84 (brs, 1H), 2.88 (s, 3H), 2.13 (s, 3H);  $^{13}\text{C}$  NMR (126 MHz,  $\text{CDCl}_3$ ):  $\delta$  = 146.7, 129.9, 129.8, 127.0, 126.9, 117.2, 116.9, 109.5, 109.4, 109.2, 109.1, 30.9, 17.3. Deuterium incorporation expected at  $\delta$  6.67 and 6.62. The level of deuterium incorporation was determined as 83% for  $\delta$  6.69 and 87% for  $\delta$  6.62 ( $^1\text{H}$  NMR).

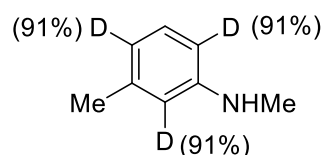

#### ***N*,3-dimethylbenzen-2,4,6-d<sub>3</sub>-amine (2l)**

Yellowish liquid;  $^1\text{H}$  NMR (500 MHz,  $\text{CDCl}_3$ )  $\delta$  = 7.07 (s, 1H), 6.53 (d,  $J$  = 6.0 Hz, **0.09H**), 6.42 (d,  $J$  = 6.5 Hz, **0.18H**), 2.79 (s, 3H), 2.28 (s, 3H);  $^{13}\text{C}$  NMR (126 MHz,  $\text{CDCl}_3$ ):  $\delta$  = 149.2, 149.1, 138.8, 138.7, 128.9, 128.8, 118.3, 118.1, 118.0, 117.8, 113.3, 113.1, 112.9, 112.8, 109.7, 109.6, 109.4, 109.3, 30.7, 21.5, 21.4. Deuterium

incorporation expected at  $\delta$  6.53 and 6.42. The level of deuterium incorporation was determined as 91% for  $\delta$  6.53 and the average deuterium incorporation of C2 and C6 was determined as 91% ( $1-0.18/2 = 0.91$ ) for  $\delta$  6.42 ( $^1\text{H}$  NMR).

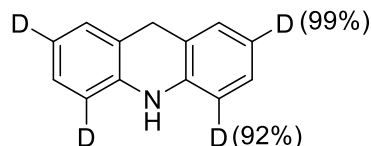

### 9,10-Dihydroacridine-2,4,5,7-d<sub>4</sub> (2m)

Yellowish solid;  $^1\text{H}$  NMR (400 MHz,  $\text{CDCl}_3$ )  $\delta = 7.10-7.08$  (m, 4H), 6.83 (t,  $J = 7.6$  Hz, **1.01H**), 6.65 (d,  $J = 8.0$  Hz, **0.15H**), 5.94 (brs, 1H), 4.05 (s, 2H);  $^{13}\text{C}$  NMR (100 MHz,  $\text{CDCl}_3$ ):  $\delta = 140.1, 128.6, 128.5, 126.8, 120.6, 120.0, 113.4, 113.3, 113.1, 113.0, 31.4$ . Deuterium incorporation expected at  $\delta$  6.83 and 6.65. The level of deuterium incorporation was determined as 99% ( $1-0.01/2 = 0.995$ ) for  $\delta$  6.83 and 92% ( $1-0.15/2 = 0.925$ ) for  $\delta$  6.65 ( $^1\text{H}$  NMR).

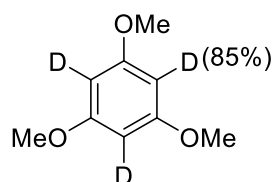

### 1,3,5-Trimethoxybenzene-2,4,6-d<sub>3</sub> (2n)

White solid;  $^1\text{H}$  NMR (500 MHz,  $\text{CDCl}_3$ )  $\delta = 6.08$  (s, 0.45H), 3.75 (s, 3H);  $^{13}\text{C}$  NMR (126 MHz,  $\text{CDCl}_3$ ):  $\delta = 161.42, 161.38, 92.9, 92.7, 92.6, 92.4, 55.2$ . Deuterium incorporation expected at  $\delta$  6.08. The level of deuterium incorporation was determined as 85% ( $1-0.45/3 = 0.85$ ) for  $\delta$  6.08 ( $^1\text{H}$  NMR).

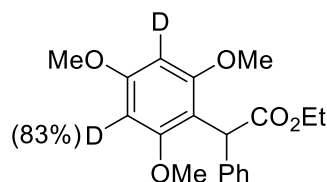

### Ethyl 2-phenyl-2-(2,4,6-trimethoxyphenyl-3,5-d<sub>2</sub>)acetate (2o)

White solid;  $^1\text{H}$  NMR (500 MHz,  $\text{CDCl}_3$ )  $\delta = 7.31$  (d,  $J = 6.5$  Hz, 2H), 7.26-7.23 (m, 2H), 7.16 (t,  $J = 6.0$  Hz, 1H), 6.14 (s, **0.34H**), 5.29 (s, 1H), 4.22-4.19 (m, 1H), 4.15-4.12 (m, 1H), 3.78-3.76 (m, 9H), 1.18 (t,  $J = 6.0$  Hz, 3H);  $^{13}\text{C}$  NMR (126 MHz,  $\text{CDCl}_3$ ):  $\delta = 173.6, 160.3, 160.2, 158.10, 158.06, 139.0, 129.2, 127.8, 126.4, 109.5,$

90.8, 90.5, 67.9, 60.6, 55.6, 55.2, 45.8, 30.2, 29.6, 25.5, 14.2. Deuterium incorporation expected at  $\delta$  6.14. The level of deuterium incorporation was determined as 83% ( $1-0.34/2 = 0.83$ ) ( $^1\text{H}$  NMR).

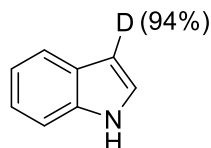

#### 1H-Indole-3-d (4a)

White solid;  $^1\text{H}$  NMR (400 MHz,  $\text{CDCl}_3$ )  $\delta = 7.63$  (d,  $J = 8.0$  Hz, 1H), 7.31 (d,  $J = 8.0$  Hz, 1H), 7.20-7.16 (m, 1H), 7.13-7.10 (m, 2H), 6.53 (d,  $J = 2.8$  Hz, **0.06H**);  $^{13}\text{C}$  NMR (100 MHz,  $\text{CDCl}_3$ ):  $\delta = 135.6, 127.7, 123.9, 121.9, 120.7, 120.6, 119.7, 111.0, 102.39, 102.36, 102.2, 102.0$ . Deuterium incorporation expected at  $\delta$  6.53. The level of deuterium incorporation was determined as 94% for ( $^1\text{H}$  NMR).

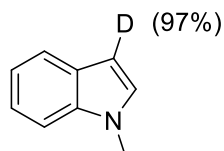

#### 1-Methyl-1H-indole-3-d (4b)

Yellowish liquid;  $^1\text{H}$  NMR (500 MHz,  $\text{CDCl}_3$ )  $\delta = 7.61$  (d,  $J = 7.0$  Hz, 1H), 7.28 (d,  $J = 7.0$  Hz, 1H), 7.19 (t,  $J = 7.0$  Hz, 1H), 7.08 (t,  $J = 6.0$  Hz, 1H), 7.00 (s, 1H), 6.46 (d,  $J = 2.5$  Hz, **0.03H**), 3.72 (s, 3H);  $^{13}\text{C}$  NMR (126 MHz,  $\text{CDCl}_3$ ):  $\delta = 136.6, 128.7, 128.6, 128.3, 121.4, 120.8, 120.75, 119.2, 109.1, 100.8, 100.75, 100.6, 100.4, 32.7$ . Deuterium incorporation expected at  $\delta$  6.46. The level of deuterium incorporation was determined as 97% ( $^1\text{H}$  NMR).

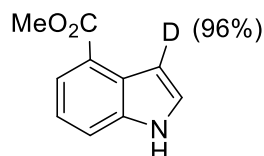

#### Methyl 1H-indole-4-carboxylate-3-d (4c)

Yellowish liquid;  $^1\text{H}$  NMR (400 MHz,  $\text{CDCl}_3$ )  $\delta = 7.92$  (dd,  $J = 7.6, 1.2$  Hz, 1H), 7.53 (dd,  $J = 8.0, 1.2$  Hz, 1H), 7.28 (m, 1H), 7.12-7.18 (m, **1.04H**), 3.97 (s, 3H);  $^{13}\text{C}$  NMR (100 MHz,  $\text{CDCl}_3$ ):  $\delta = 168.5, 136.6, 136.5, 127.2, 126.3, 123.3, 121.2, 120.9, 116.2, 116.1, 103.4, 103.36, 103.2, 103.0, 51.7$ . Deuterium incorporation expected at  $\delta$  7.12-7.18. The level of deuterium incorporation was determined as 96% ( $^1\text{H}$  NMR).



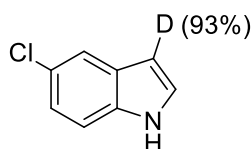

#### 5-Chloro-1H-indole-3-d (4d)

Yellowish solid;  $^1\text{H}$  NMR (400 MHz, DMSO- $d_6$ )  $\delta$  = 7.58 (d,  $J$  = 2.0 Hz, 1H), 7.43-7.41 (m, 2H), 7.07 (dd,  $J$  = 8.0, 2.0 Hz, 1H), 6.42 (d,  $J$  = 2.8 Hz, **0.07H**);  $^{13}\text{C}$  NMR (100 MHz, DMSO- $d_6$ ):  $\delta$  = 134.4, 134.3, 128.82, 128.78, 127.03, 126.96, 126.87, 123.5, 120.9, 119.2, 112.93, 112.88, 100.9, 100.7, 100.5. Deuterium incorporation expected at  $\delta$  6.42. The level of deuterium incorporation was determined as 93% ( $^1\text{H}$  NMR).

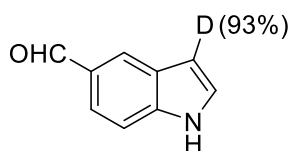

#### 1H-Indole-3-d-5-carbaldehyde (4e)

Yellowish solid;  $^1\text{H}$  NMR (500 MHz, DMSO- $d_6$ )  $\delta$  = 11.61 (brs, 1H), 9.96 (s, 1H), 8.18 (s, 1H), 7.63 (d,  $J$  = 2.0 Hz, 1H), 7.56-7.51 (m, 2H), 6.66 (s, **0.07H**);  $^{13}\text{C}$  NMR (126 MHz, DMSO- $d_6$ ):  $\delta$  = 192.6, 139.4, 128.9, 127.6, 127.4, 125.9, 120.8, 112.2, 112.1, 103.2, 103.0. Deuterium incorporation expected at  $\delta$  6.66. The level of deuterium incorporation was determined as 93% ( $^1\text{H}$  NMR).

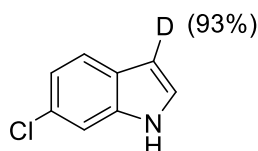

#### 6-Chloro-1H-indole-3-d (4f)

Yellowish solid;  $^1\text{H}$  NMR (500 MHz, DMSO- $d_6$ )  $\delta$  = 11.22 (brs, 0.26H), 7.53 (d,  $J$  = 6.0 Hz, 1H), 7.45 (s, 1H), 7.38 (s, 1H), 7.00 (d,  $J$  = 7.0 Hz, 1H), 6.45 (s, **0.07H**);  $^{13}\text{C}$  NMR (126 MHz, DMSO- $d_6$ ):  $\delta$  = 136.4, 136.2, 126.41, 126.39, 126.3, 125.7, 121.4, 119.2, 111.1, 111.0, 101.3, 101.1, 100.9. Deuterium incorporation expected at  $\delta$  6.45. The level of deuterium incorporation was determined as 93% ( $^1\text{H}$  NMR).

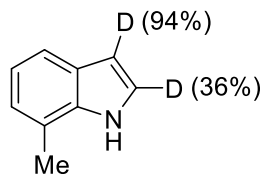

#### 7-Methyl-1*H*-indole-2,3-d<sub>2</sub> (4g)

Yellowish liquid; <sup>1</sup>H NMR (400 MHz, CDCl<sub>3</sub>) δ = 7.48 (d, *J* = 8.0 Hz, 1H), 7.09 (s, **0.64H**), 7.05-7.02 (m, 1H), 6.97 (d, *J* = 6.8 Hz, 1H), 6.50 (d, *J* = 2.8 Hz, **0.06H**), 2.43 (s, 3H); <sup>13</sup>C NMR (100 MHz, CDCl<sub>3</sub>): δ = 135.2, 127.2, 123.6, 122.3, 120.1, 119.9, 119.8, 118.4, 102.9, 102.8, 102.6, 102.4, 16.6. Deuterium incorporation expected at δ 7.09 and 6.50. The level of deuterium incorporation was determined as 36% for δ 7.09 and 94% for δ 6.50 (<sup>1</sup>H NMR).

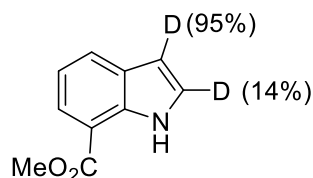

#### Methyl 1*H*-indole-7-carboxylate-3-d (4h)

Yellowish liquid; <sup>1</sup>H NMR (400 MHz, CDCl<sub>3</sub>) δ = 7.90-7.84 (m, 2H), 7.29 (s, **0.86H**), 7.12 (t, *J* = 7.6 Hz, 1H), 6.58 (d, *J* = 3.2 Hz, **0.05H**), 3.96 (s, 3H); <sup>13</sup>C NMR (100 MHz, CDCl<sub>3</sub>): δ = 167.9, 135.4, 128.9, 126.4, 125.1, 125.0, 124.9, 124.2, 119.0, 112.4, 102.41, 102.37, 102.2, 102.0, 51.8. Deuterium incorporation expected at δ 7.29 and 6.58. The level of deuterium incorporation was determined as 14% for δ 7.29 and 95% for δ 6.58 (<sup>1</sup>H NMR).

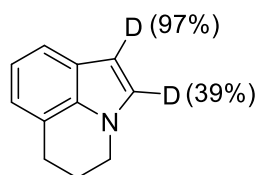

#### 5,6-Dihydro-4*H*-pyrrolo[3,2,1-*ij*]quinoline-1-d (4i)

Yellowish liquid; <sup>1</sup>H NMR (500 MHz, CDCl<sub>3</sub>) δ = 7.44-7.42 (m, 1H), 7.02-6.97 (m, **1.61H**), 6.88 (dd, *J* = 8.5, 1.0 Hz, 0.81H), 6.43 (d, *J* = 2.5 Hz, **0.03H**), 4.07 (t, *J* = 7.0 Hz, 2H), 2.94 (t, *J* = 7.5 Hz, 2H), 2.21-2.15 (m, 2H); <sup>13</sup>C NMR (126 MHz, CDCl<sub>3</sub>): δ = 134.1, 125.8, 125.7, 121.6, 119.6, 118.2, 100.30, 100.27, 100.1, 99.9, 44.1, 24.7, 22.9. Deuterium incorporation expected at δ 7.02-6.97 and 6.43. The level of

deuterium incorporation was determined as 39% for  $\delta$  7.02-6.97 and 97% for  $\delta$  6.43 ( $^1\text{H}$  NMR).

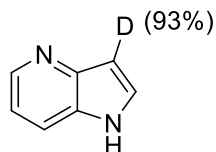

#### **1H-Pyrrolo[3,2-*b*]pyridine-3-d (4j)**

Yellowish solid;  $^1\text{H}$  NMR (500 MHz,  $\text{CDCl}_3$ )  $\delta$  = 11.10 (brs, 1H), 8.46-8.45 (m, 1H), 7.76 (d,  $J$  = 7.0 Hz, 1H), 7.54 (s, 1H), 7.10 (dd,  $J$  = 7.0, 4.0 Hz, 1H), 6.69 (d,  $J$  = 2.5 Hz, **0.07H**);  $^{13}\text{C}$  NMR (126 MHz,  $\text{CDCl}_3$ ):  $\delta$  = 145.7, 142.2, 129.3, 129.1, 128.9, 119.5, 116.5, 101.8, 101.6, 101.4. Deuterium incorporation expected at  $\delta$  6.69. The level of deuterium incorporation was determined as 93% ( $^1\text{H}$  NMR).

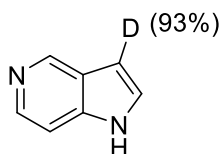

#### **1H-Pyrrolo[3,2-*c*]pyridine-3-d (4k)**

Yellowish solid;  $^1\text{H}$  NMR (500 MHz,  $\text{CDCl}_3$ )  $\delta$  = 11.99 (brs, 1H), 8.96 (s, 1H), 8.24 (d,  $J$  = 5.0 Hz, 1H), 7.42 (d,  $J$  = 5.0 Hz, 1H), 7.37 (s, 1H), 6.66 (d,  $J$  = 2.5 Hz, **0.07H**);  $^{13}\text{C}$  NMR (126 MHz,  $\text{CDCl}_3$ ):  $\delta$  = 142.0, 142.3, 138.5, 126.9, 125.1, 107.5, 101.3, 101.1, 100.9. Deuterium incorporation expected at  $\delta$  6.66. The level of deuterium incorporation was determined as 93% ( $^1\text{H}$  NMR).

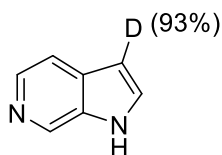

#### **1H-Pyrrolo[2,3-*c*]pyridine-3-d (4l)**

Yellowish solid;  $^1\text{H}$  NMR (500 MHz,  $\text{CDCl}_3$ )  $\delta$  = 11.76 (brs, 1H), 8.85 (s, 1H), 8.18 (d,  $J$  = 5.0 Hz, 1H), 7.58 (d,  $J$  = 4.5 Hz, 1H), 7.48 (s, 1H), 6.55 (d,  $J$  = 2.5 Hz, **0.07H**);  $^{13}\text{C}$  NMR (126 MHz,  $\text{CDCl}_3$ ):  $\delta$  = 136.4, 133.5, 133.33, 133.26, 130.1, 130.0, 115.5, 101.4, 101.2, 100.0. Deuterium incorporation expected at  $\delta$  6.55. The level of deuterium incorporation was determined as 93% ( $^1\text{H}$  NMR).

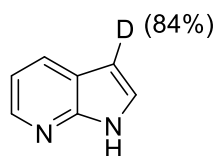

**1H-Pyrrolo[2,3-*b*]pyridine-3-d (4m)**

Yellowish solid;  $^1\text{H}$  NMR (400 MHz,  $\text{CDCl}_3$ )  $\delta$  = 12.19 (brs, 1H), 8.31 (dd,  $J$  = 7.2, 0.8 Hz, 1H), 7.94 (dd,  $J$  = 5.2, 0.8 Hz, 1H), 7.38 (s, 1H), 7.05 (dd,  $J$  = 5.2, 3.2 Hz, 1H), 6.47 (d,  $J$  = 2.4 Hz, **0.16H**);  $^{13}\text{C}$  NMR (100 MHz,  $\text{CDCl}_3$ ):  $\delta$  = 148.7, 141.9, 129.2, 129.1, 125.5, 120.73, 120.65, 115.5, 100.3, 100.1, 100.0. Deuterium incorporation expected at  $\delta$  6.47. The level of deuterium incorporation was determined as 93% ( $^1\text{H}$  NMR).

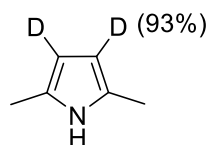

**2,5-Dimethyl-1H-pyrrole-3,4-d<sub>2</sub> (4n)**

Yellowish liquid;  $^1\text{H}$  NMR (500 MHz,  $\text{CDCl}_3$ )  $\delta$  = 5.73 (s, **0.14H**), 4.92 (s, 2H), 2.22 (s, 6H);  $^{13}\text{C}$  NMR (126 MHz,  $\text{CDCl}_3$ ):  $\delta$  = 125.8, 105.6, 105.5, 105.4, 105.2, 18.9, 12.9, 12.8. Deuterium incorporation expected at  $\delta$  5.73. The level of deuterium incorporation was determined as 93% ( $^1\text{H}$  NMR).

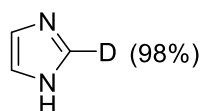

**1H-Imidazole-2-d (4o)**

White solid;  $^1\text{H}$  NMR (500 MHz,  $\text{CDCl}_3$ )  $\delta$  = 12.23 (brs, 1H), 7.75 (s, **0.02H**), 7.11 (s, 2H);  $^{13}\text{C}$  NMR (126 MHz,  $\text{CDCl}_3$ ):  $\delta$  = 135.3, 135.0, 134.8, 121.8. Deuterium incorporation expected at  $\delta$  7.75. The level of deuterium incorporation was determined as 98% ( $^1\text{H}$  NMR).

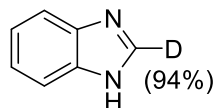

**1H-Benzo[*d*]imidazole-2-d (4p)**

White solid;  $^1\text{H}$  NMR (500 MHz,  $\text{DMSO-d}_6$ )  $\delta$  = 12.09 (brs, 0.29H), 8.24 (s, **0.06H**), 7.59 (dd,  $J$  = 7.5, 4.0 Hz, 2H), 7.18 (dd,  $J$  = 7.5, 4.0 Hz, 2H);  $^{13}\text{C}$  NMR (126 MHz,

DMSO- $d_6$ ):  $\delta = 142.0, 141.8, 141.6, 138.1, 121.8, 115.4$ . Deuterium incorporation expected at  $\delta 8.24$ . The level of deuterium incorporation was determined as 94% ( $^1\text{H}$  NMR).

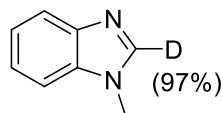

#### 1-Methyl-1H-benzo[d]imidazole-2-d (4q)

Colorless liquid;  $^1\text{H}$  NMR (500 MHz,  $\text{CDCl}_3$ )  $\delta = 7.81$  (s, **0.03H**), 7.78 (d,  $J = 7.5$  Hz, 1H), 7.35 (d,  $J = 7.5$  Hz, 1H), 7.31-7.25 (m, 2H), 3.77 (s, 1H);  $^{13}\text{C}$  NMR (126 MHz,  $\text{CDCl}_3$ ):  $\delta = 143.6, 143.5, 143.4, 143.1, 134.4, 123.0, 122.1, 120.1, 109.4, 31.0$ . Deuterium incorporation expected at  $\delta 7.81$ . The level of deuterium incorporation was determined as 97% ( $^1\text{H}$  NMR).

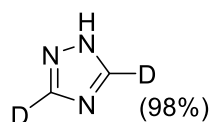

#### 1H-1,2,4-Triazole-3,5-d<sub>2</sub> (4r)

White solid;  $^1\text{H}$  NMR (500 MHz, DMSO- $d_6$ )  $\delta = 14.09$  (brs, 1H), 8.29 (s, **0.02H**);  $^{13}\text{C}$  NMR (126 MHz, DMSO- $d_6$ ):  $\delta = 149.3$  (m), 143.8 (m). Deuterium incorporation expected at  $\delta 8.29$ . The level of deuterium incorporation was determined as 98% ( $^1\text{H}$  NMR).

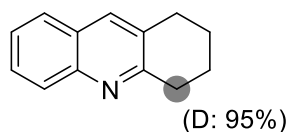

#### 1,2,3,4-Tetrahydroacridine-4,4-d<sub>2</sub> (6a)

White solid;  $^1\text{H}$  NMR (400 MHz,  $\text{CDCl}_3$ )  $\delta = 7.98$  (d,  $J = 7.0$  Hz, 1H), 7.79 (m, 1H), 7.67 (d,  $J = 5.6$  Hz, 1H), 7.59 (td,  $J = 5.6, 0.8$  Hz, 1H), 7.44-7.41 (m, 1H), 3.09 (t,  $J = 4.4$  Hz, **0.10H**), 2.93 (t,  $J = 4.0$  Hz, 2H), 1.95 (t,  $J = 4.0$  Hz, 2H), 1.89-1.85 (m, 2H);  $^{13}\text{C}$  NMR (100 MHz,  $\text{CDCl}_3$ ):  $\delta = 159.0, 145.9, 135.4, 131.0, 128.7, 127.7, 126.8, 125.6, 32.9, 32.8, 32.7, 32.5, 32.4, 32.3, 32.2, 29.0, 22.8, 22.7, 22.6$ . Deuterium incorporation expected at  $\delta 3.09$ . The level of deuterium incorporation was determined as 95% ( $1 - 0.10/2 = 0.95$ ) ( $^1\text{H}$  NMR).

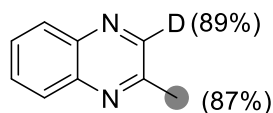

### 2-(Methyl-d<sub>3</sub>)quinoxaline-3-d (6b)

White solid; <sup>1</sup>H NMR (500 MHz, CDCl<sub>3</sub>)  $\delta$  = 8.74 (s, **0.11H**), 8.06 (dd,  $J$  = 5.6, 0.8 Hz, 1H), 8.01 (dd,  $J$  = 5.6, 0.8 Hz, 1H), 7.75-7.68 (m, 2H), 2.76-2.73 (m, **0.38H**); <sup>13</sup>C NMR (100 MHz, CDCl<sub>3</sub>):  $\delta$  = 153.6, 153.5, 145.9, 141.95, 141.92, 140.8, 129.9, 128.8, 128.5, 22.1, 22.0, 21.9, 21.7, 21.6, 21.5. Deuterium incorporation expected at  $\delta$  8.74 and 2.76-2.73. The level of deuterium incorporation was determined as 89% for  $\delta$  8.74 and 87% for  $\delta$  2.76-2.73 and  $(1-0.38/3 = 0.87)$  (<sup>1</sup>H NMR).

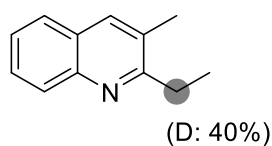

### 2-(Ethyl-1-d)-3-methylquinoline (6c)

Yellowish liquid; <sup>1</sup>H NMR (500 MHz, CDCl<sub>3</sub>)  $\delta$  = 8.04 (d,  $J$  = 7.0 Hz, 1H), 7.82 (s, 1H), 7.69-7.68 (m, 1H), 7.62-7.59 (m, 1H), 7.45-7.42 (m, 1H), 3.03-2.98 (m, **1.2 H**), 2.47 (s, 3H), 1.38-1.35 (m, 3H); <sup>13</sup>C NMR (126 MHz, CDCl<sub>3</sub>):  $\delta$  = 163.3, 146.3, 136.1, 129.4, 128.4, 128.3, 127.3, 126.7, 125.7, 29.7, 29.5, 29.4, 29.2, 19.01, 19.00, 12.81, 12.74, 12.67. Deuterium incorporation expected at  $\delta$  3.03-2.98. The level of deuterium incorporation was determined as 40%  $[(2-1.2)/2 = 0.40]$  (<sup>1</sup>H NMR).

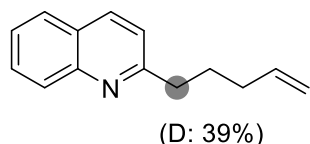

### 2-(Pent-4-en-1-yl-1-d)quinoline (6d)

Yellowish liquid; <sup>1</sup>H NMR (500 MHz, CDCl<sub>3</sub>)  $\delta$  = 8.08-8.05 (m, 2H), 7.95 (d,  $J$  = 6.5 Hz, 1H), 7.68-7.66 (m, 1H), 7.45 (t,  $J$  = 6.5 Hz, 1H), 7.27 (d,  $J$  = 7.0 Hz, 1H), 5.87-5.82 (m, 1H), 5.05-4.97 (m, 2H), 2.31-2.96 (m, **1.22H**), 2.18-2.14 (m, 2H), 1.95-1.89 (m, 2H); <sup>13</sup>C NMR (126 MHz, CDCl<sub>3</sub>):  $\delta$  = 162.56, 162.55, 147.5, 138.1, 136.5, 129.5, 128.5, 127.4, 126.7, 125.7, 121.3, 114.9, 38.6, 38.4, 38.2, 38.1, 33.4, 33.33, 33.31, 29.0, 28.94, 28.87. Deuterium incorporation expected at  $\delta$  2.31-2.96. The level of deuterium incorporation was determined as 39%  $[(2-1.22)/2 = 0.39]$  (<sup>1</sup>H NMR).

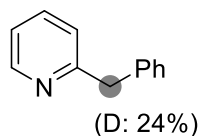

### 2-(Phenylmethyl-d)pyridine (6e)

Colorless liquid;  $^1\text{H}$  NMR (400 MHz,  $\text{CDCl}_3$ )  $\delta$  = 8.52 (d,  $J$  = 7.2 Hz, 1H), 7.56 (td,  $J$  = 5.2, 1.2 Hz, 1H), 7.29-7.27 (m, 2H), 7.25-7.19 (m, 3H), 7.12-7.10 (m, 2H), 4.14-4.13 (m, **1.52H**);  $^{13}\text{C}$  NMR (100 MHz,  $\text{CDCl}_3$ ):  $\delta$  = 160.74, 160.72, 149.4, 139.12, 139.09, 136.8, 128.99, 128.98, 128.5, 126.4, 123.3, 121.3, 44.6, 44.4, 44.3, 44.1. Deuterium incorporation expected at  $\delta$  4.14-4.13. The level of deuterium incorporation was determined as 24% [(2-1.52)/2 = 0.24] ( $^1\text{H}$  NMR).

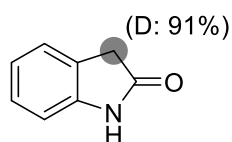

### Indolin-2-one-3,3-d<sub>2</sub> (6f)

Yellowish solid;  $^1\text{H}$  NMR (500 MHz,  $\text{CDCl}_3$ )  $\delta$  = 9.76 (brs, 1H), 7.20-7.19 (m, 2H), 6.98 (t,  $J$  = 6.5 Hz, 1H), 6.90 (d,  $J$  = 7.0 Hz, 1H), 3.50 (s, **0.17H**);  $^{13}\text{C}$  NMR (126 MHz,  $\text{CDCl}_3$ ):  $\delta$  = 178.5, 178.4, 142.8, 142.74, 142.65, 127.8, 125.2, 125.1, 124.42, 124.40, 122.2, 109.9, 109.8, 36.1, 36.0, 35.8, 35.7, 35.6. Deuterium incorporation expected at  $\delta$  3.50. The level of deuterium incorporation was determined as 91% [(2-0.17)/2 = 0.915] ( $^1\text{H}$  NMR).

## 4. $^1\text{H}$ , and $^{13}\text{C}$ NMR Spectra

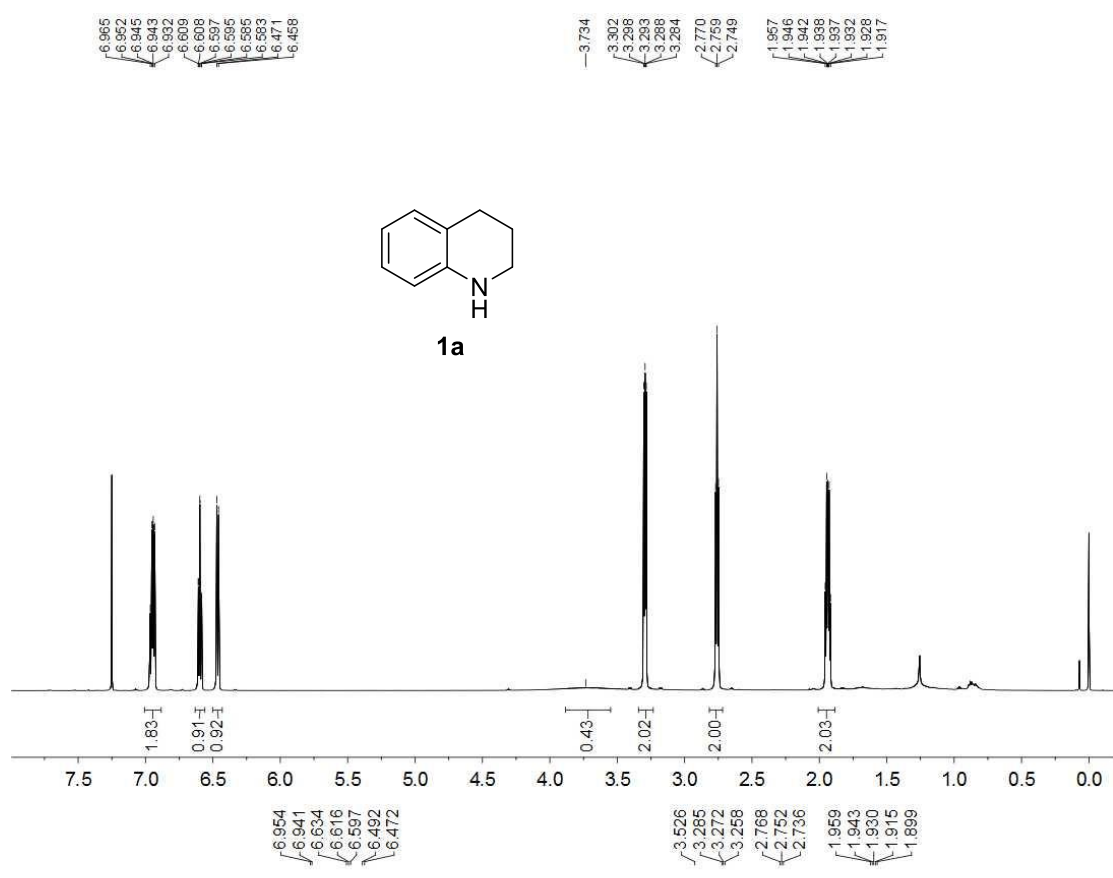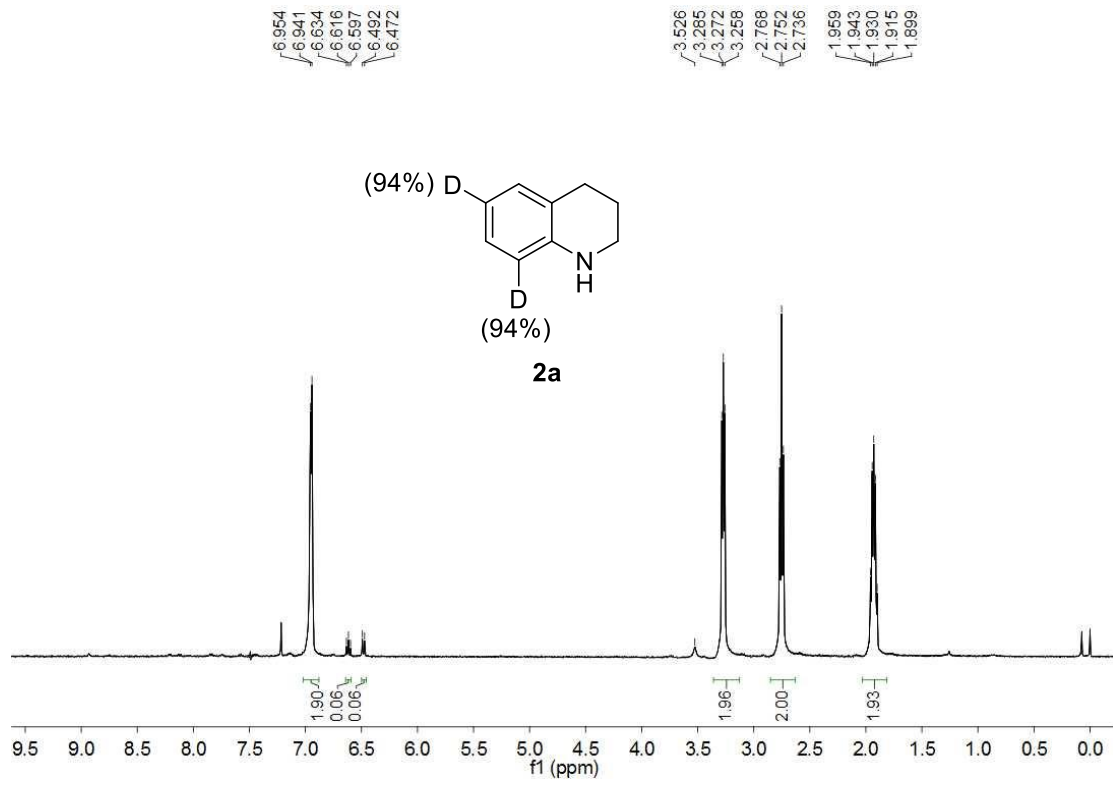



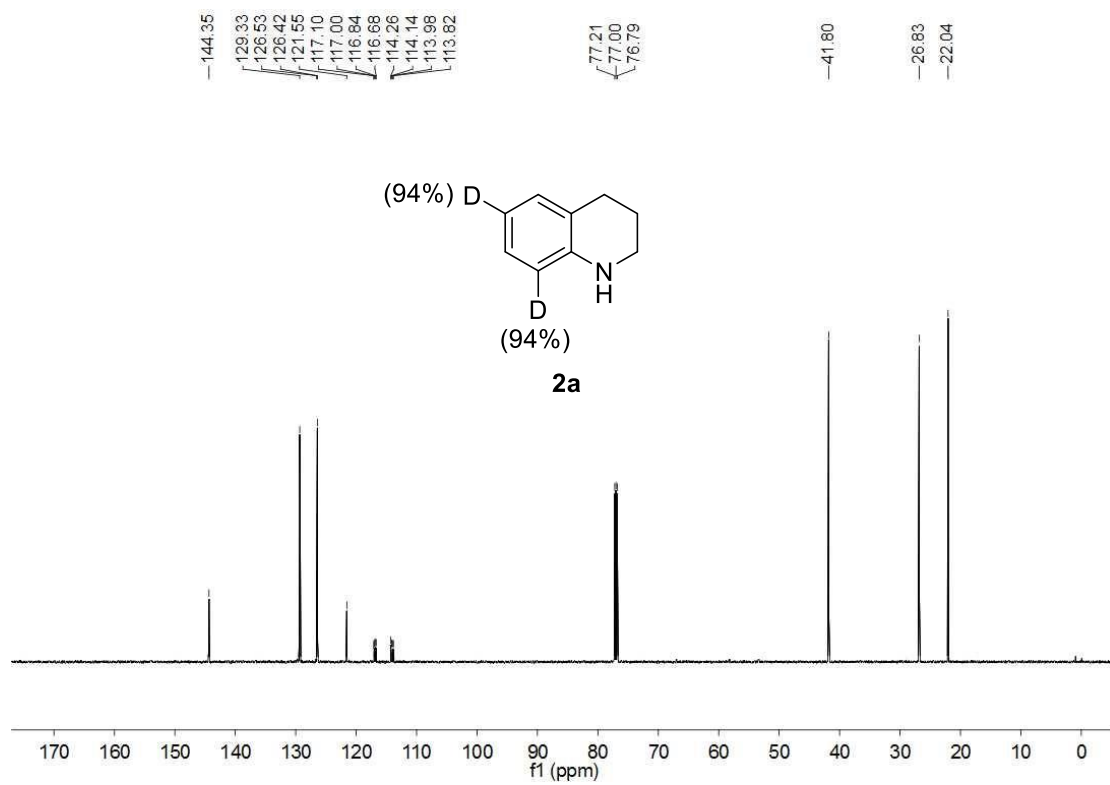

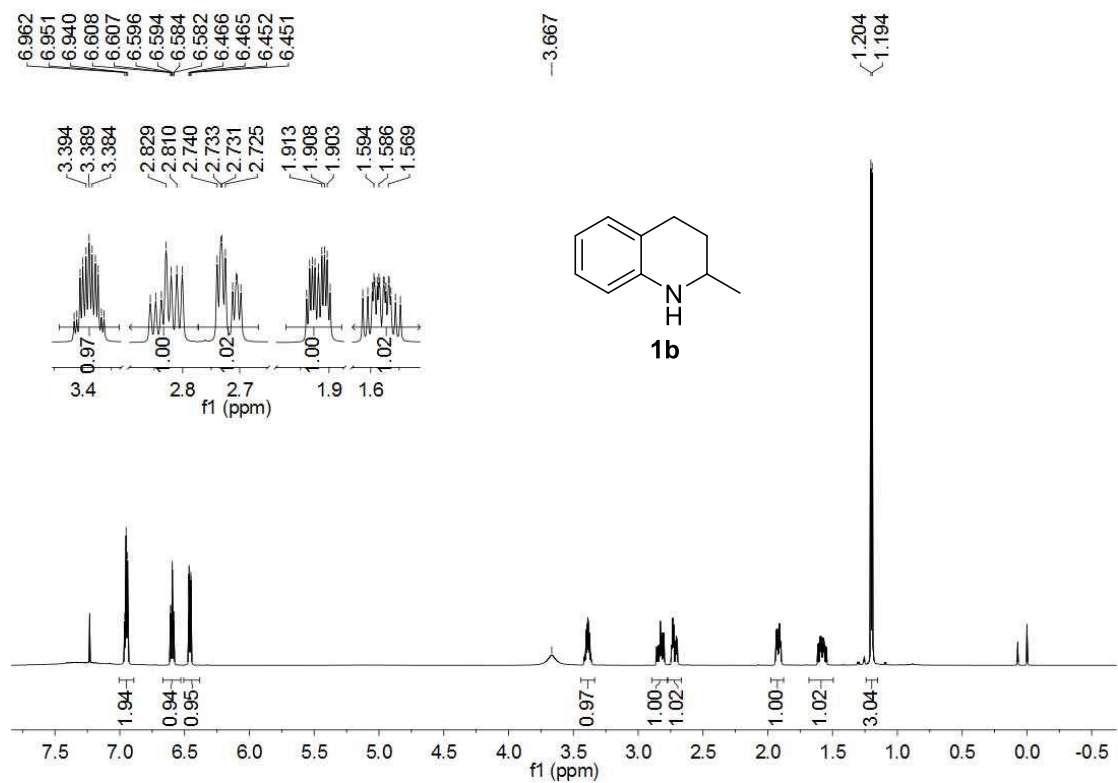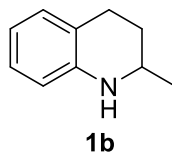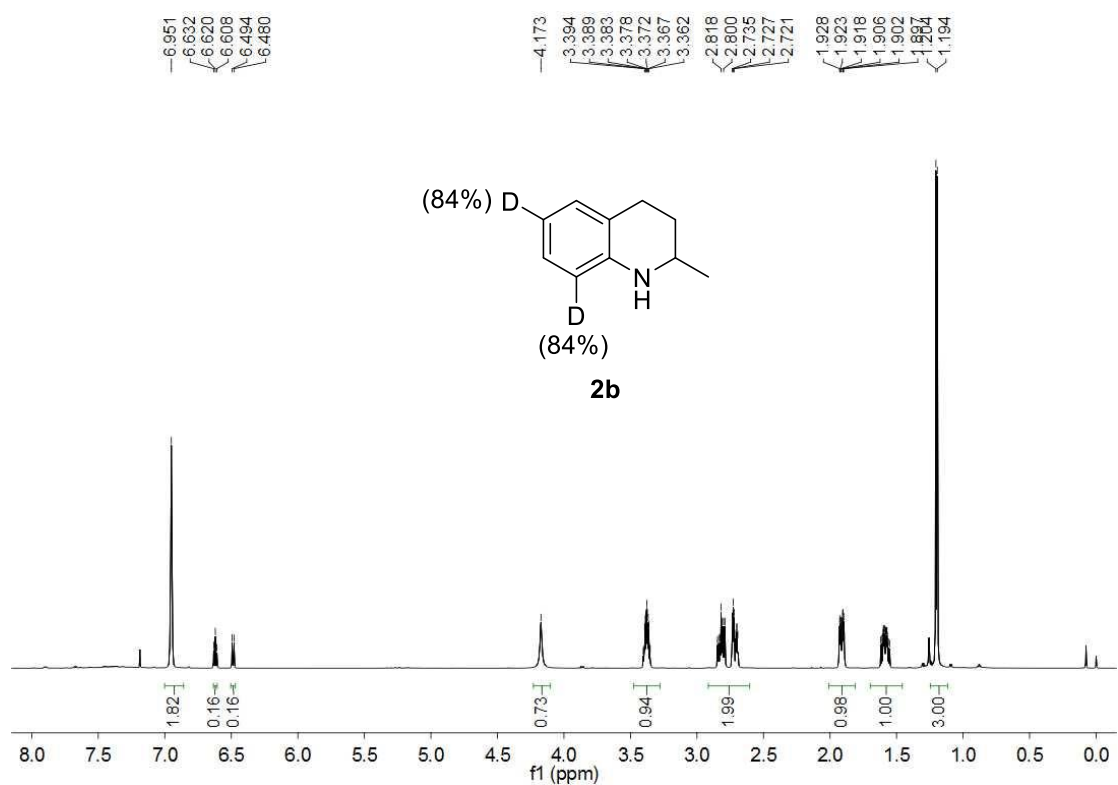

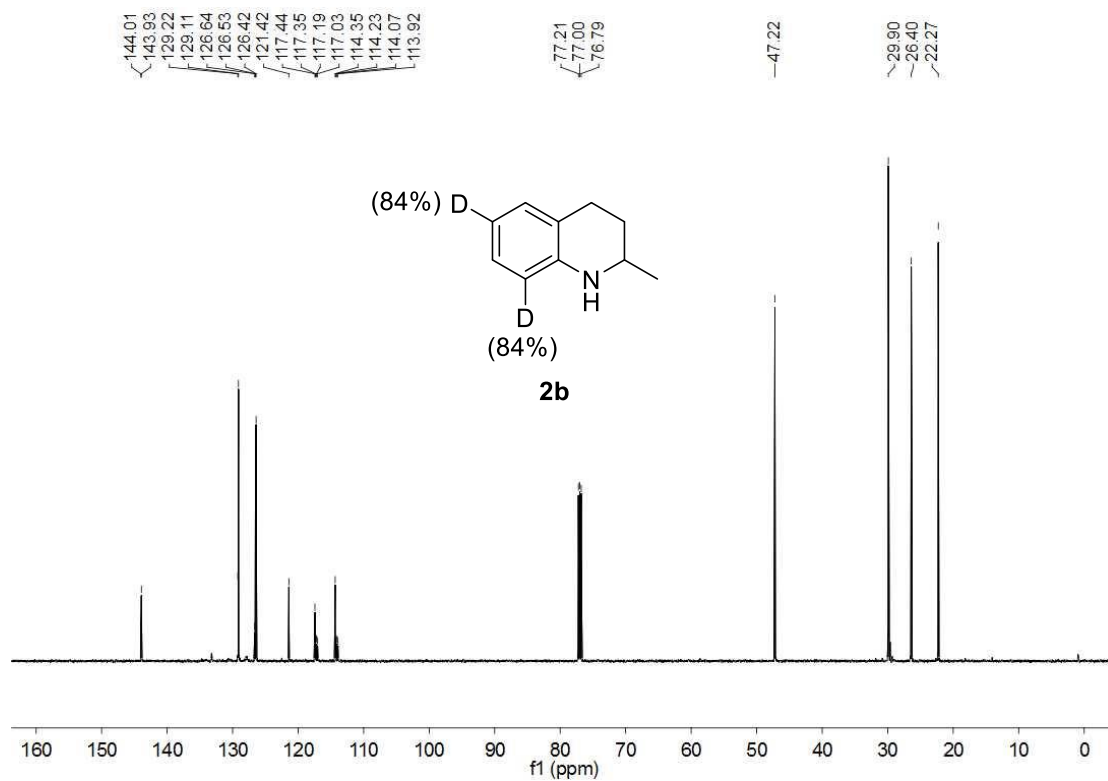

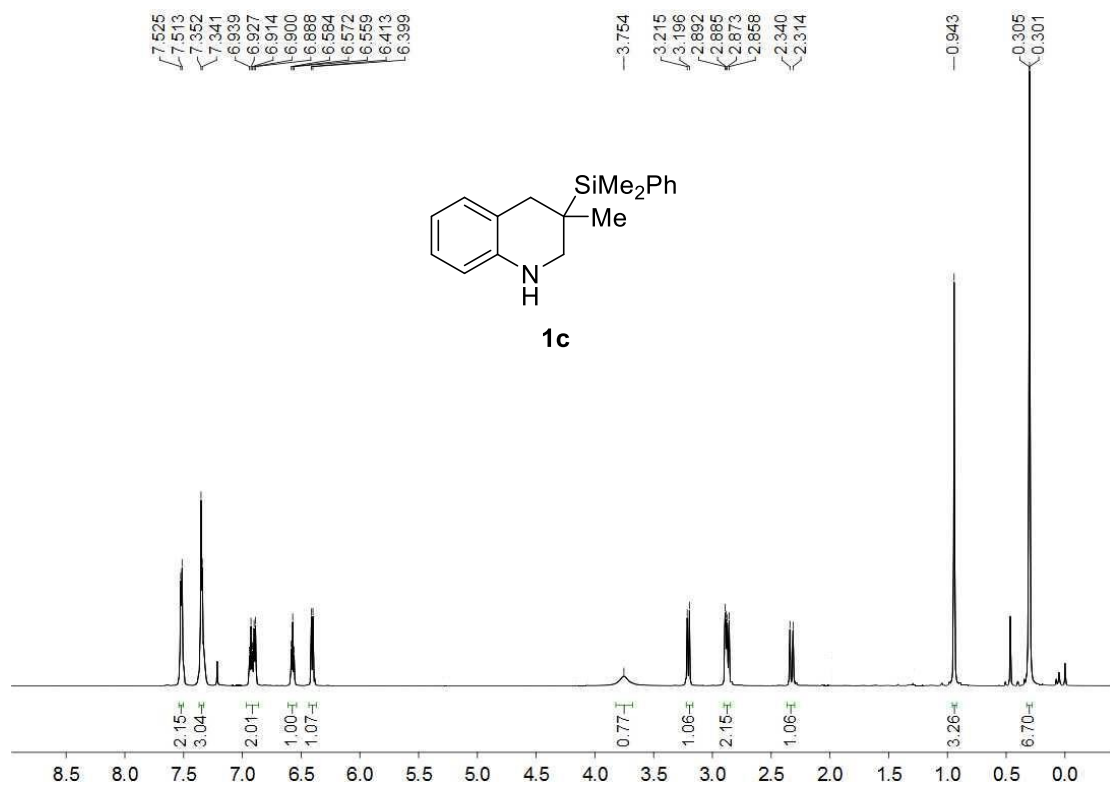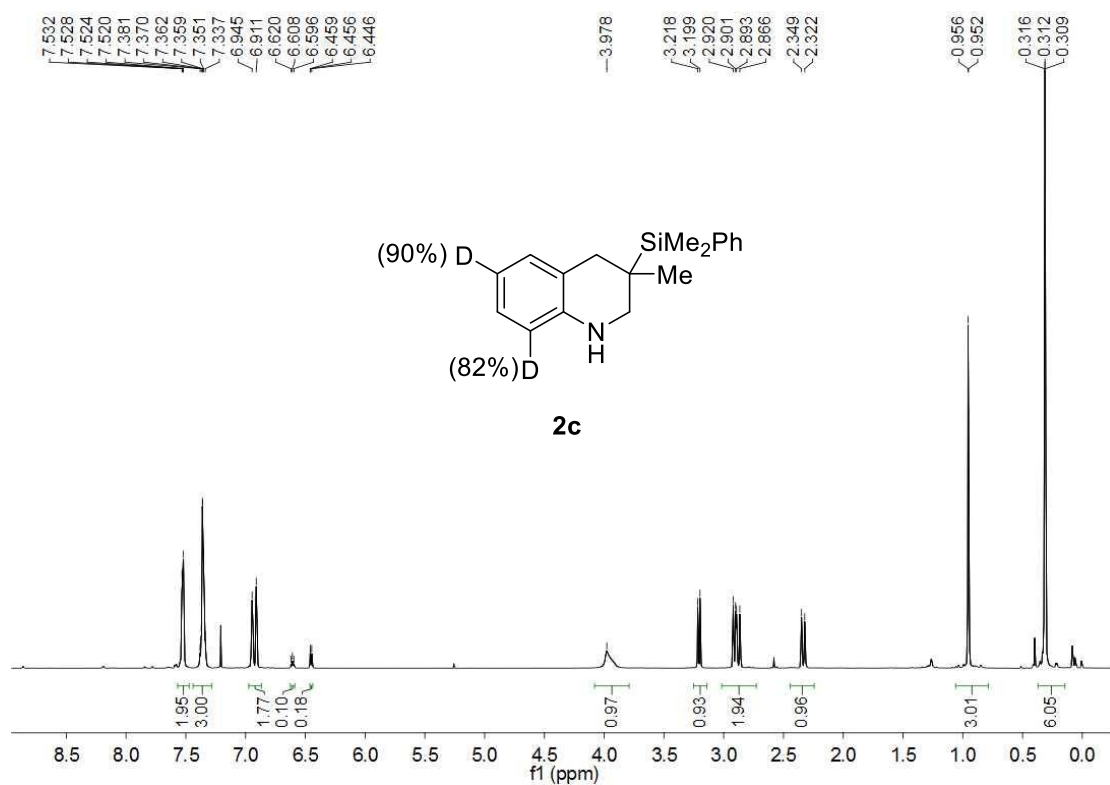

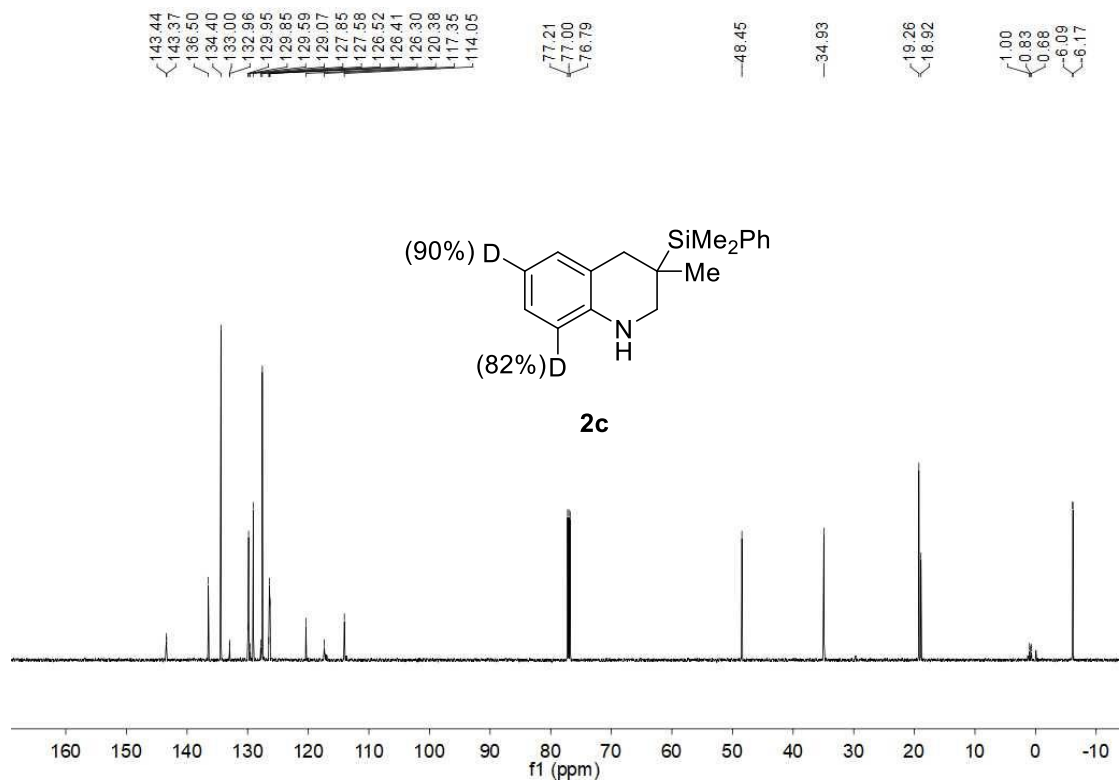

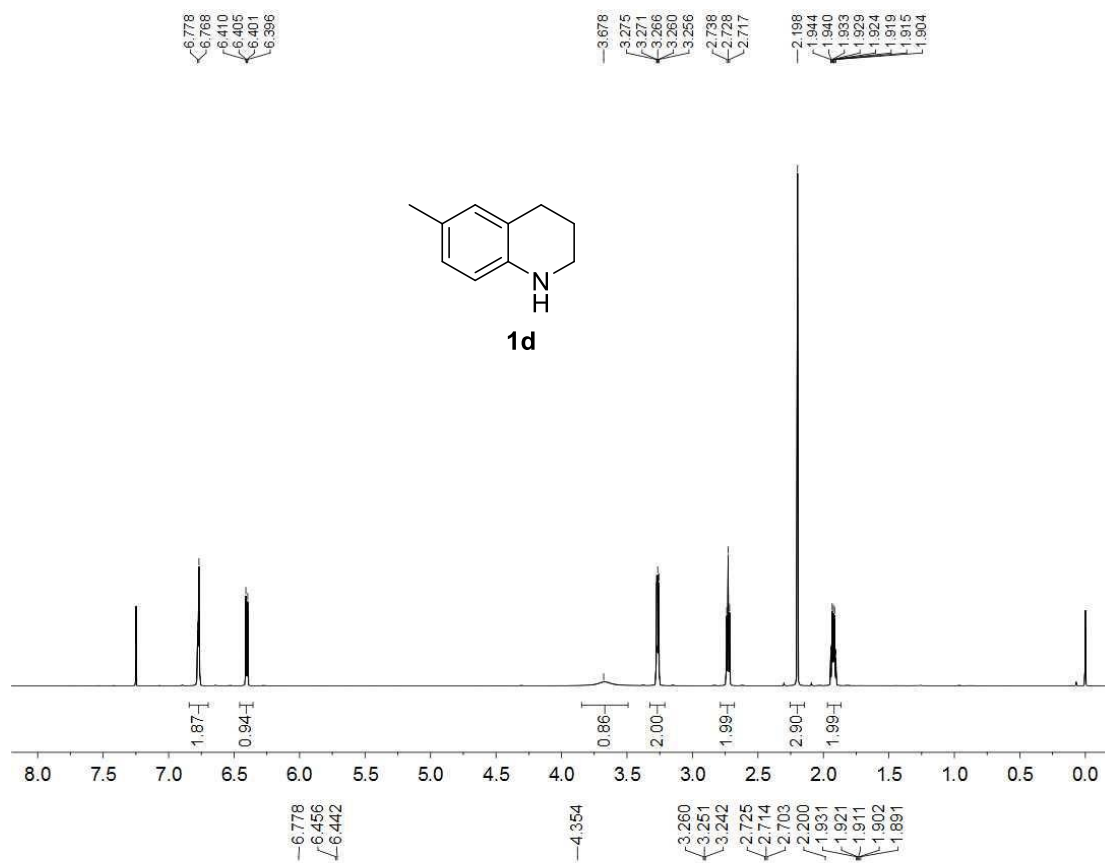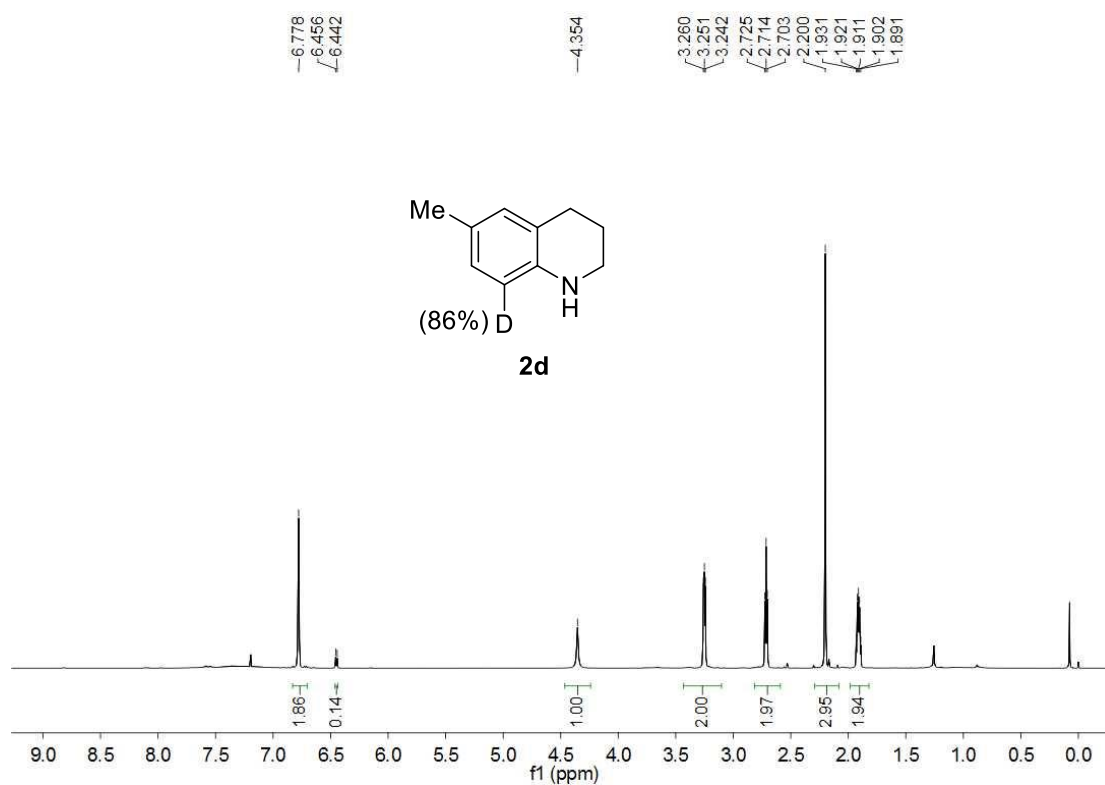

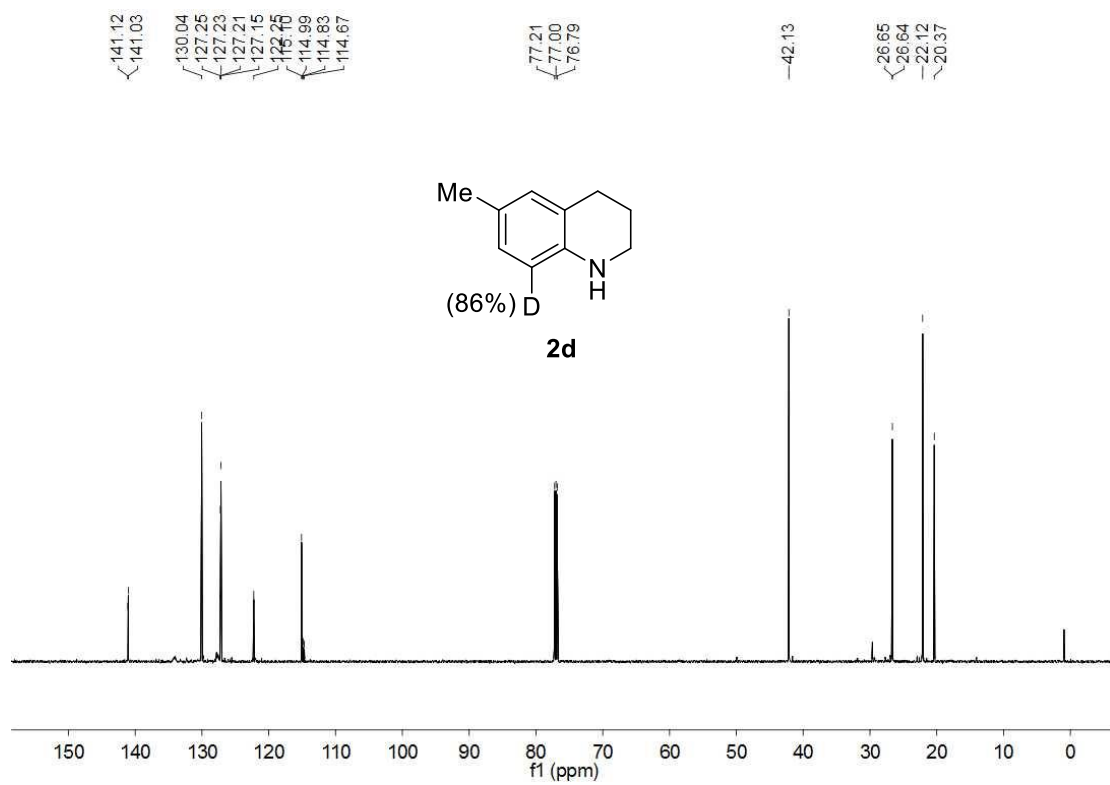

7.042  
7.040  
7.038  
7.027  
7.023  
7.013  
7.009  
6.335  
6.321

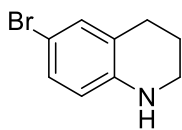

**1e**

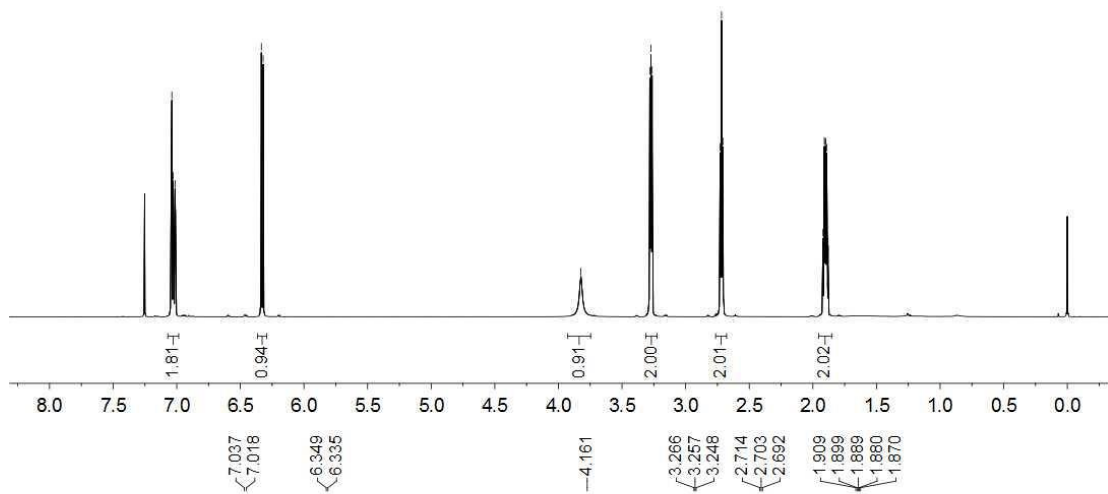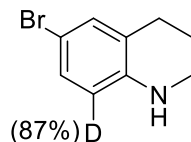

**2e**

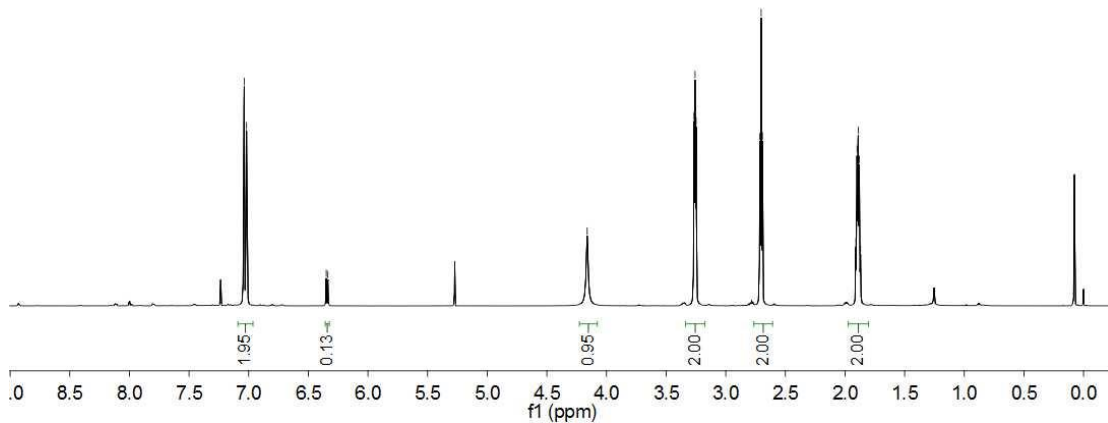



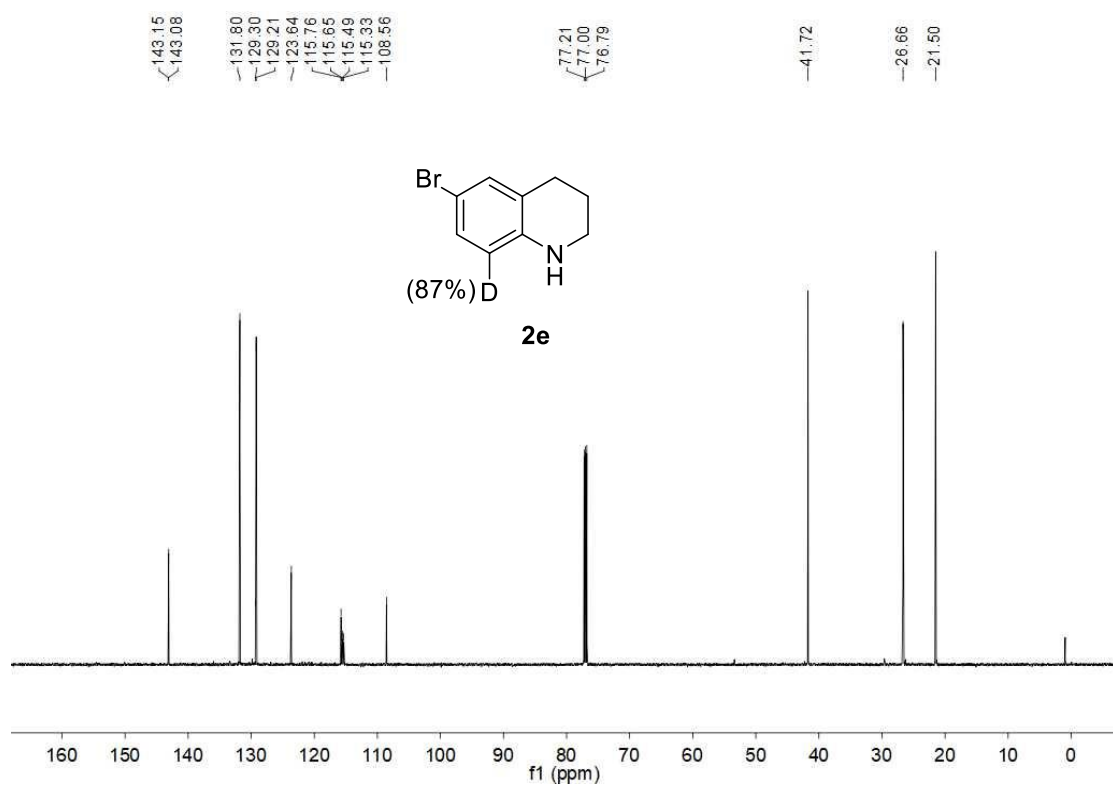

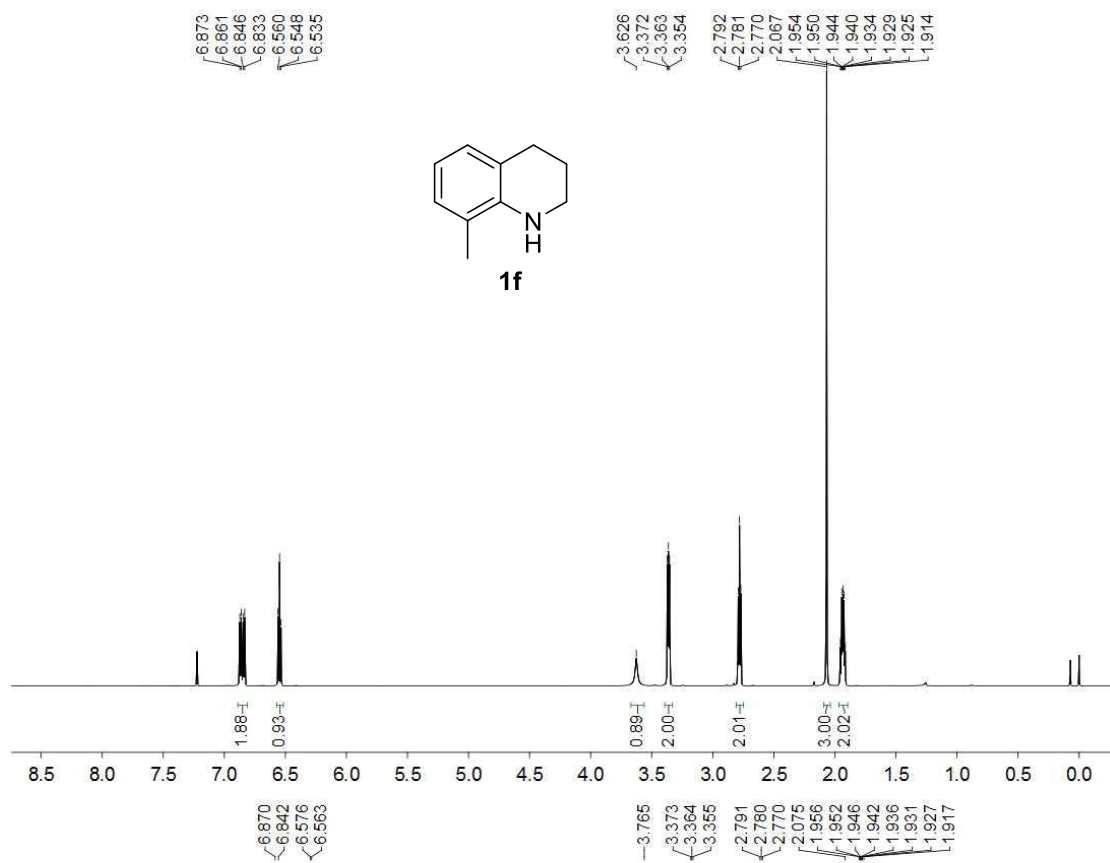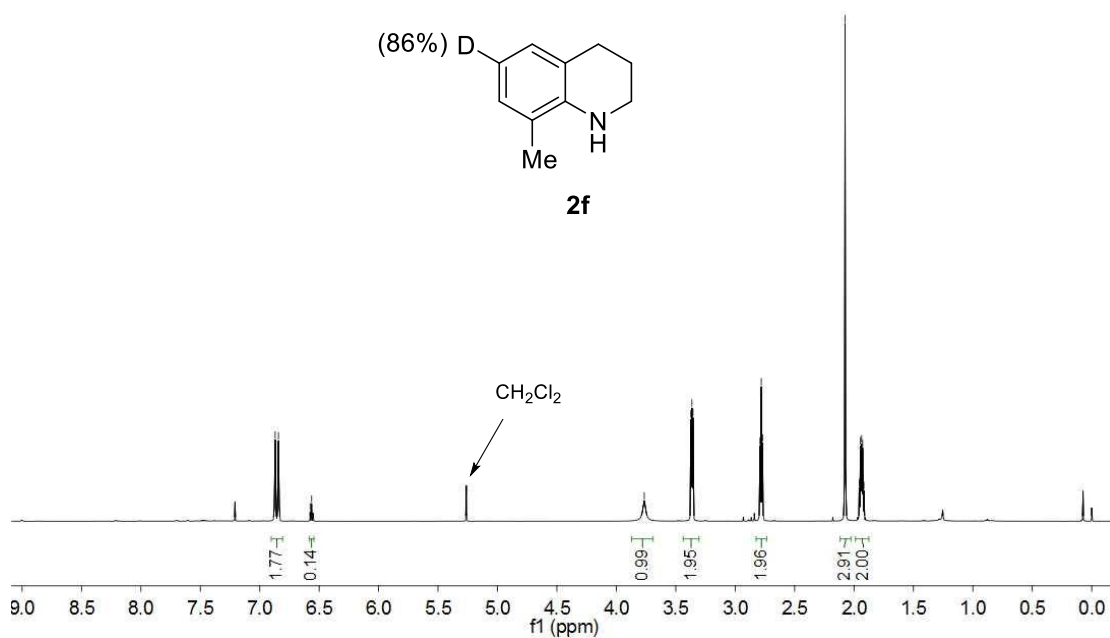

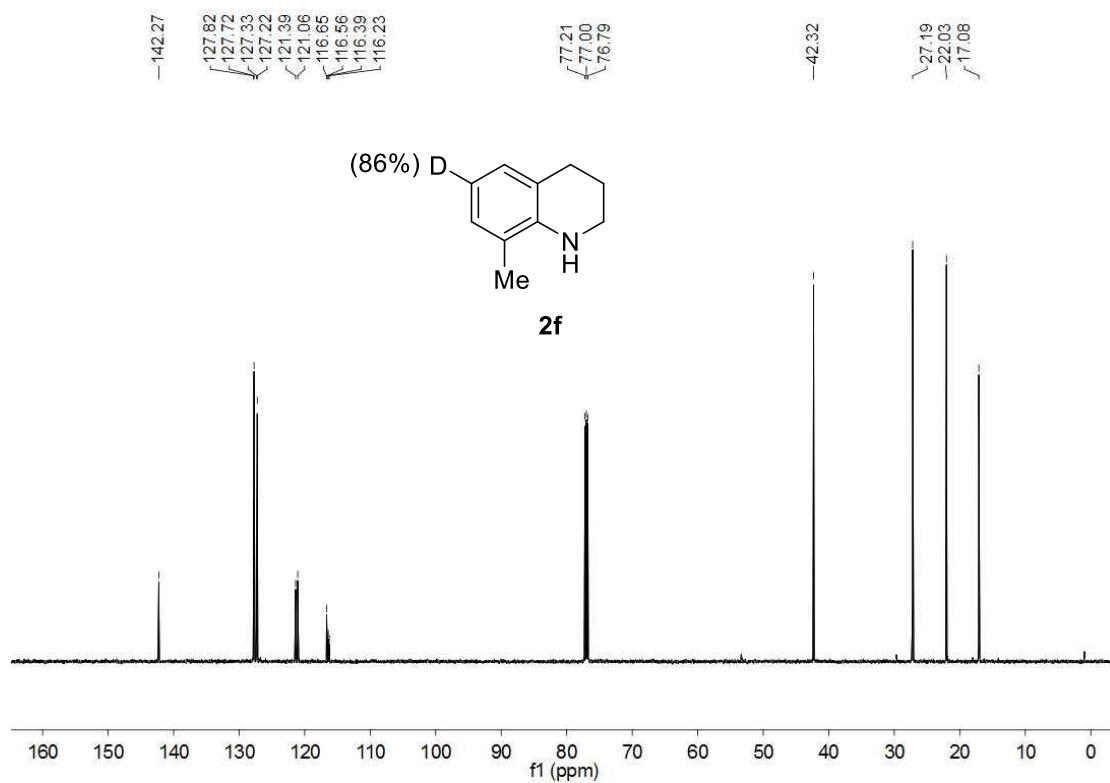

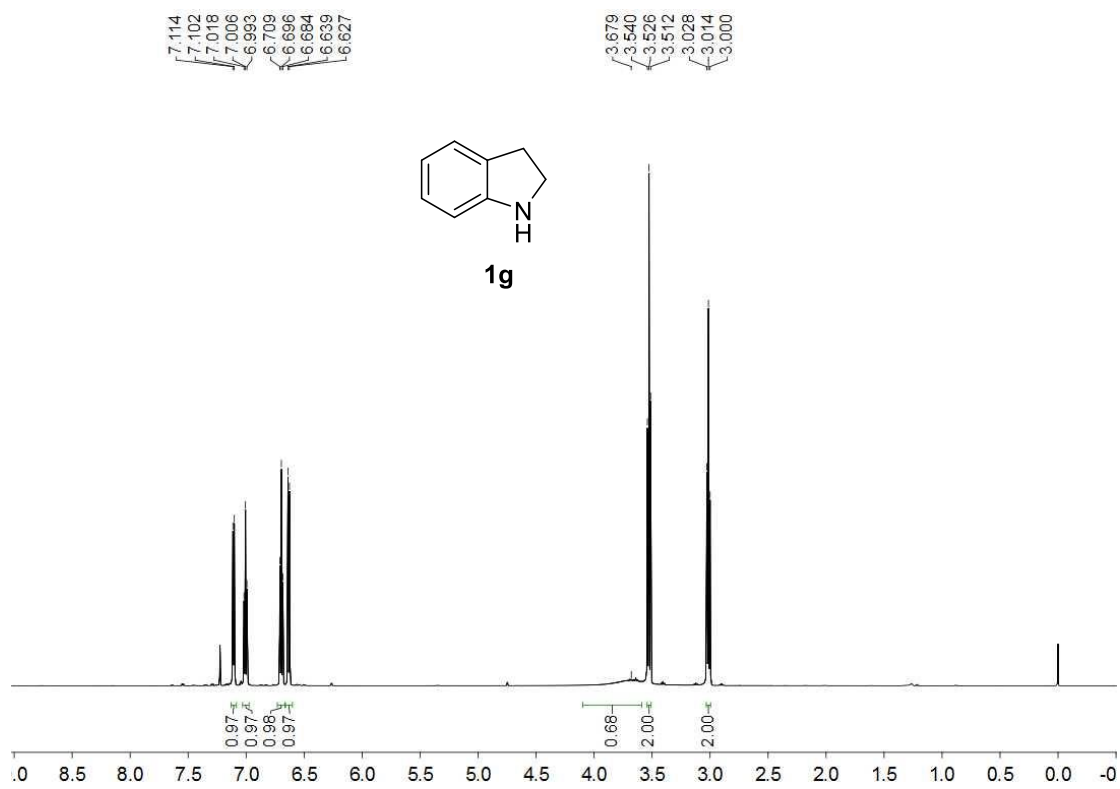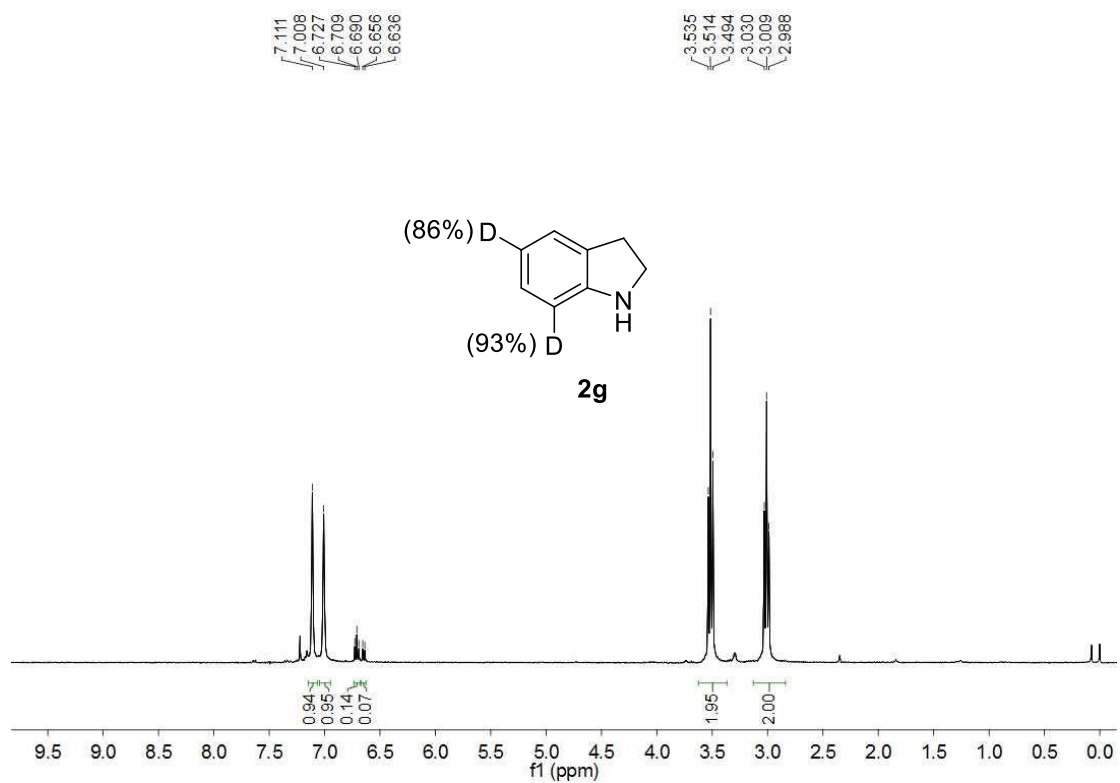

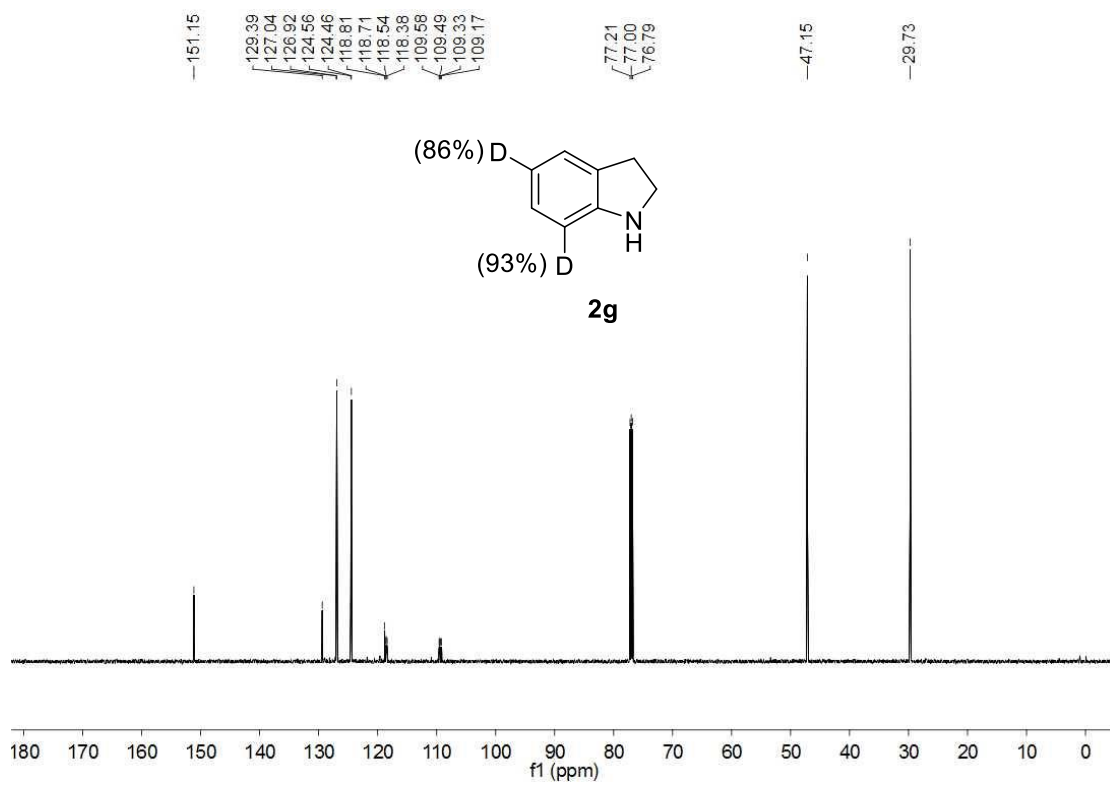

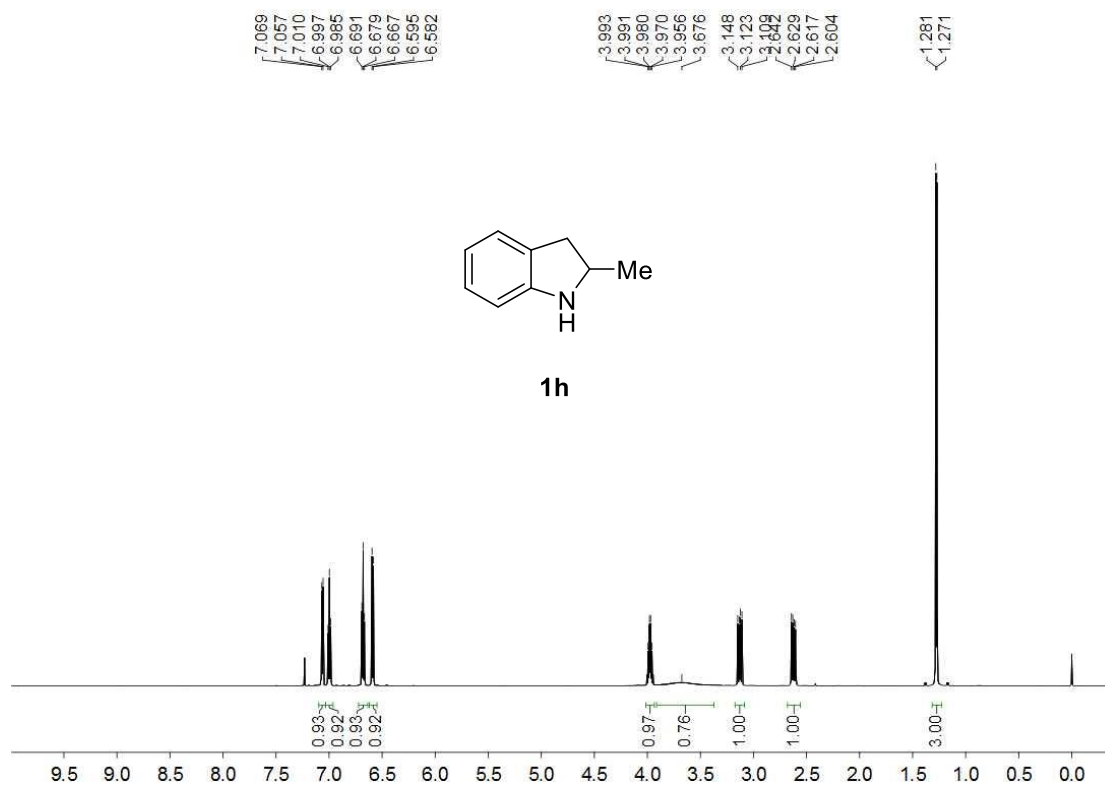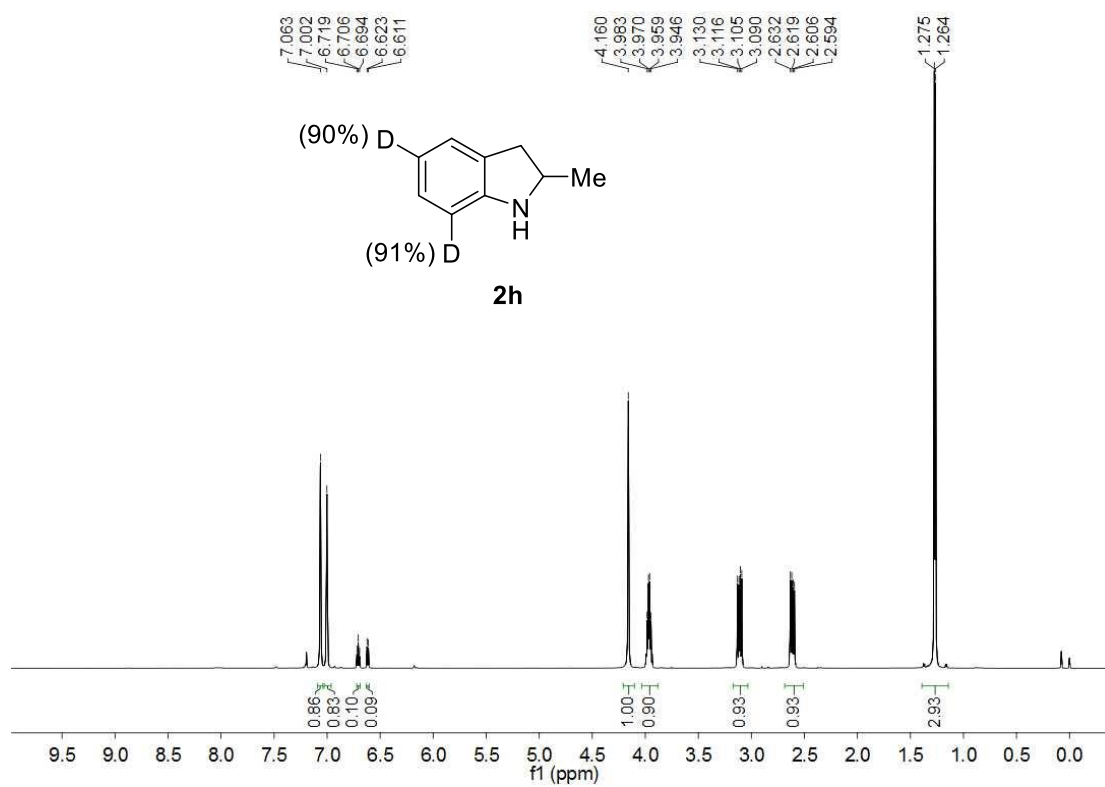

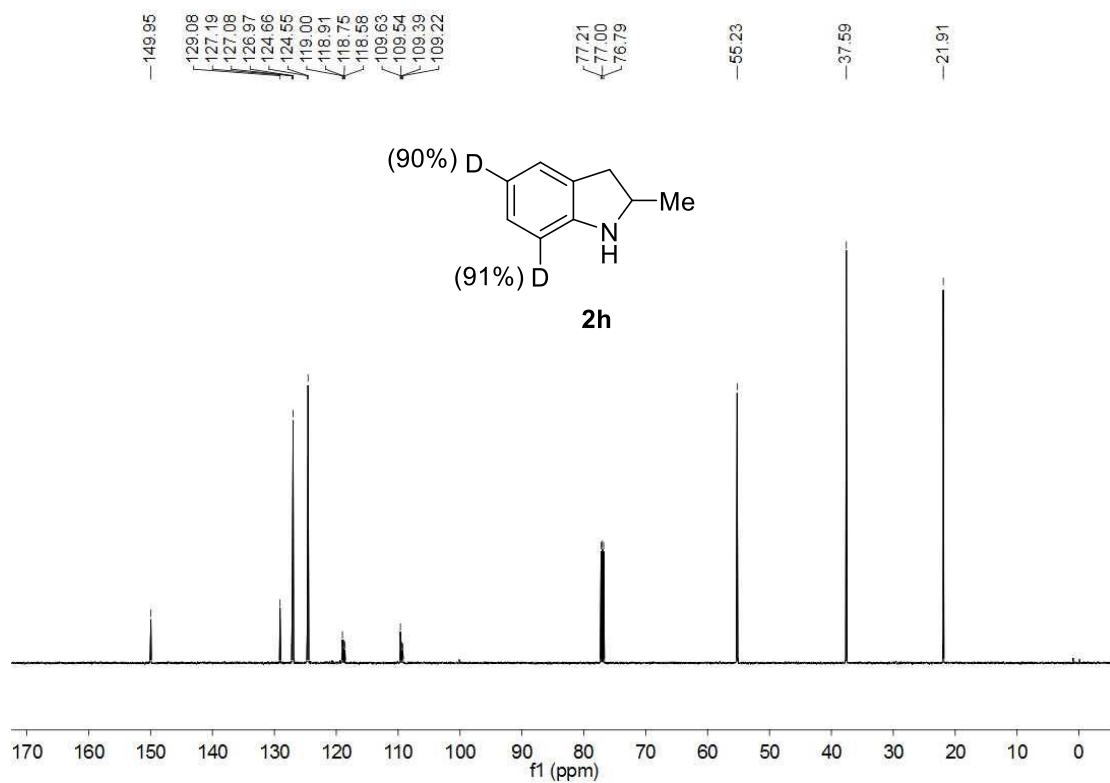

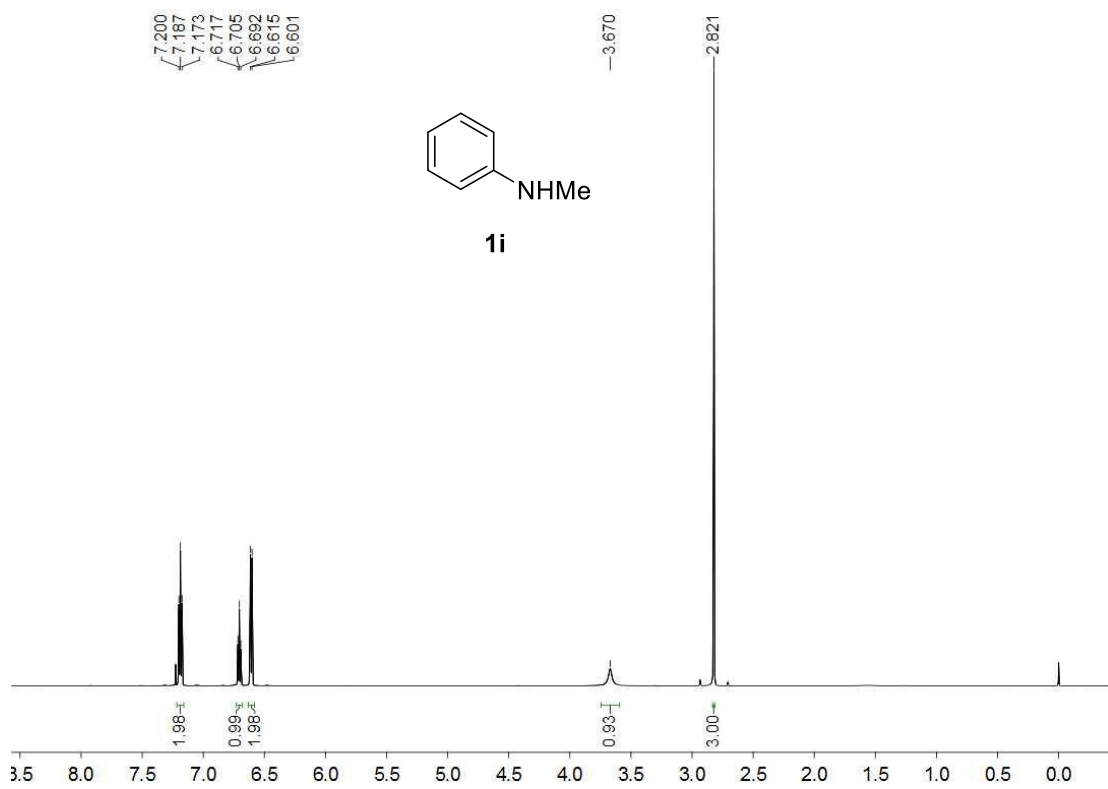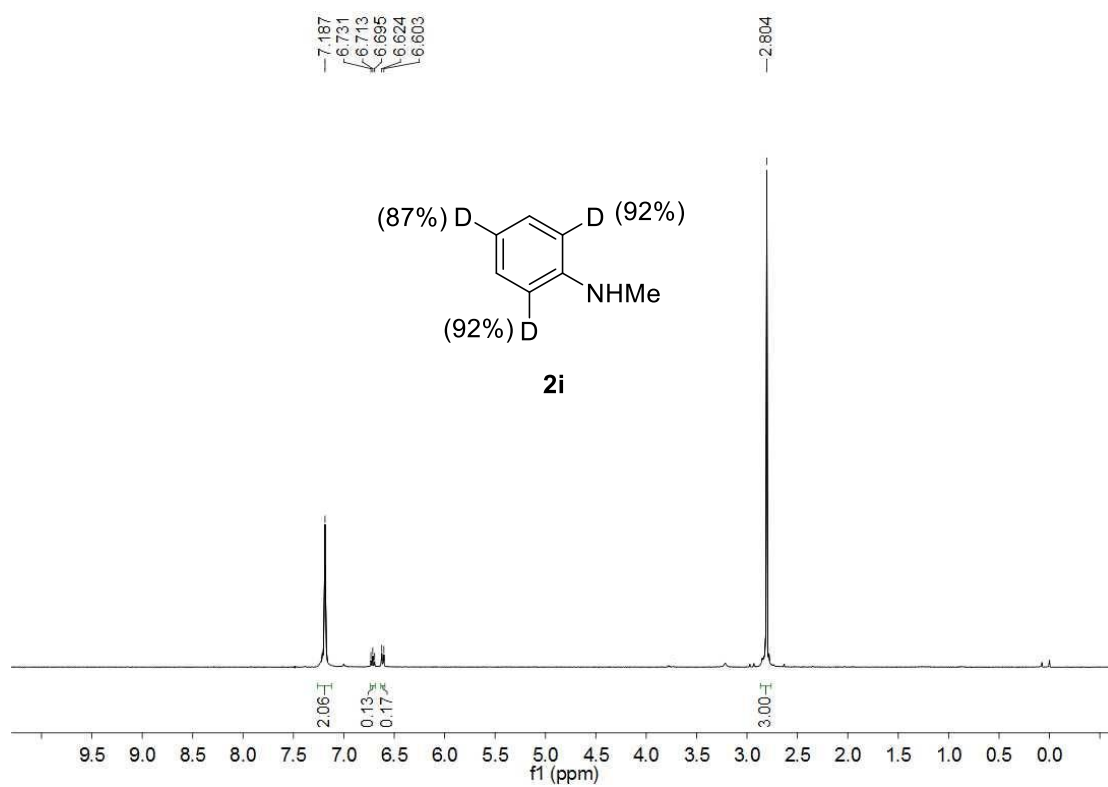



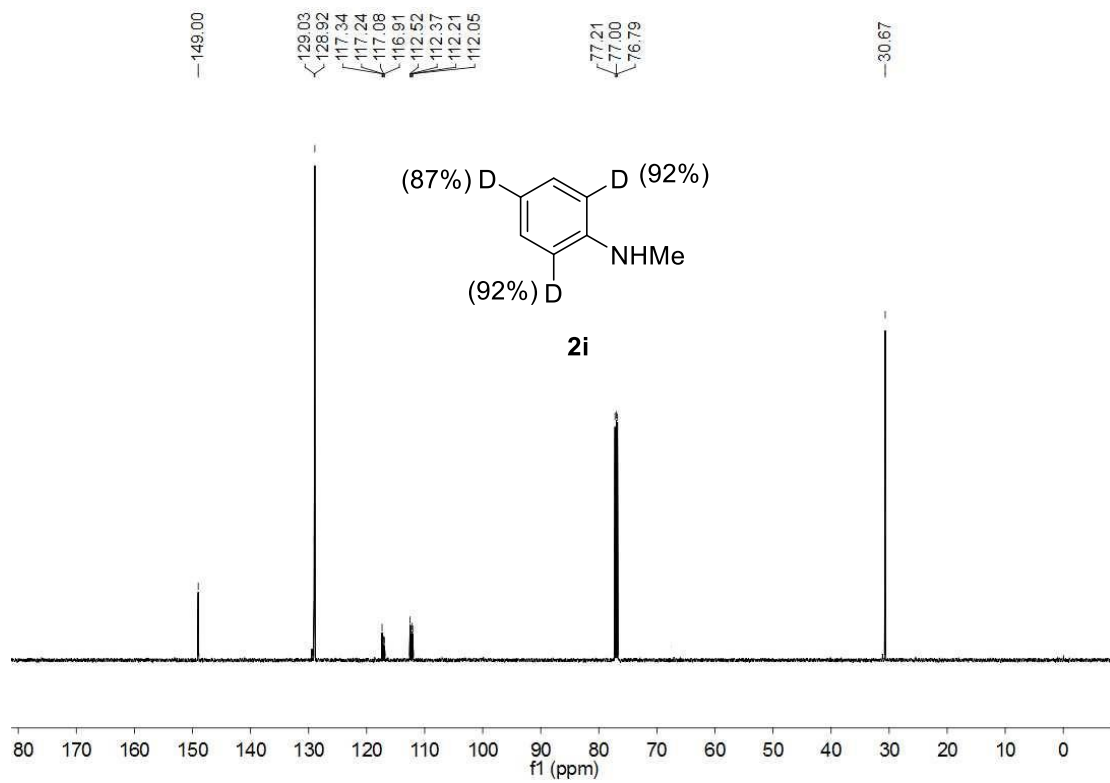

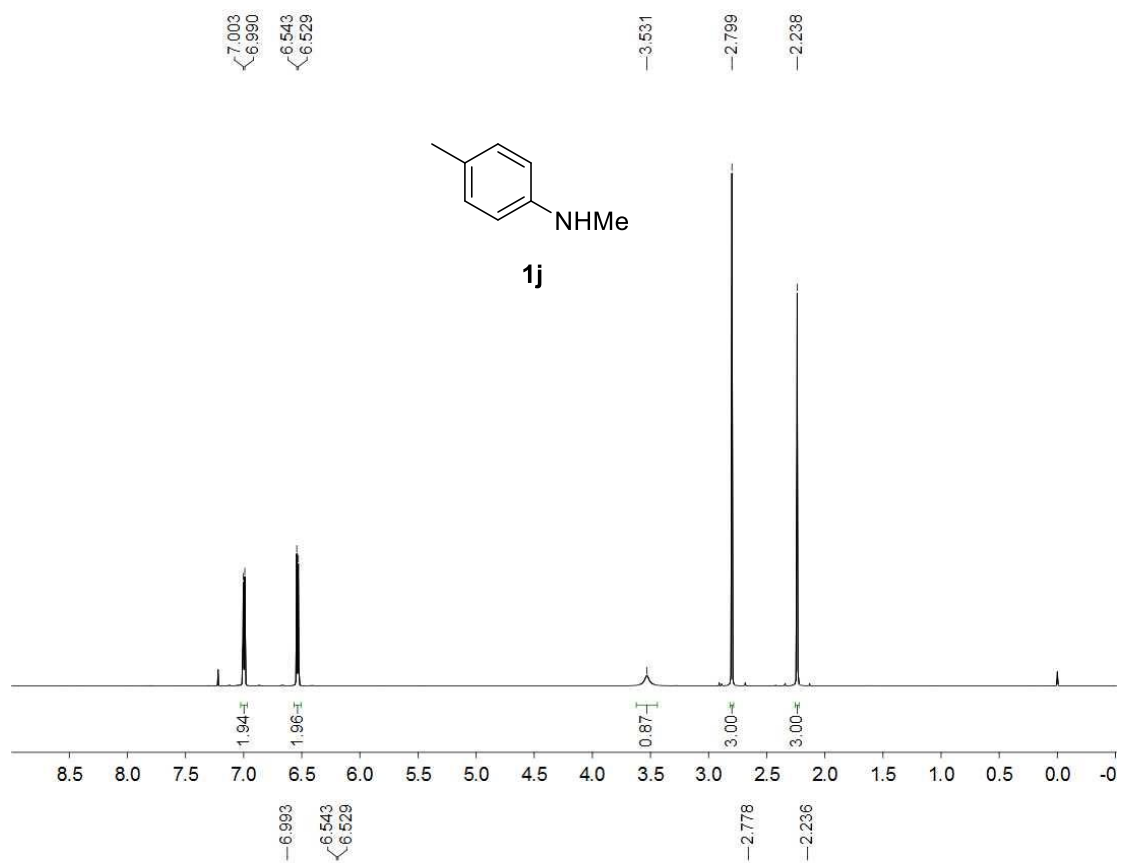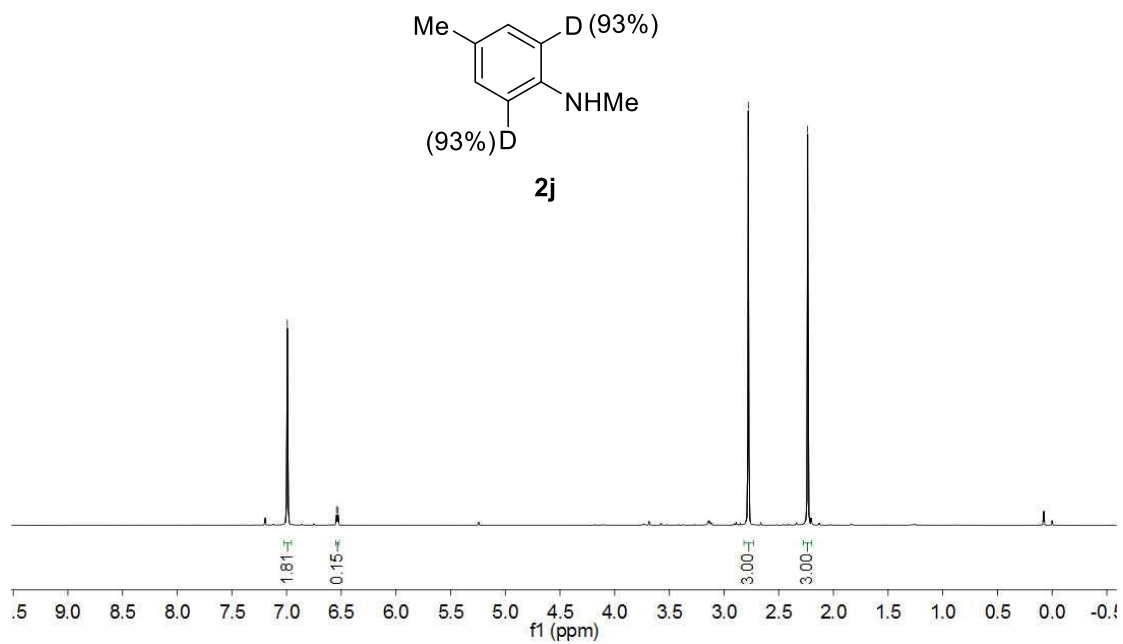

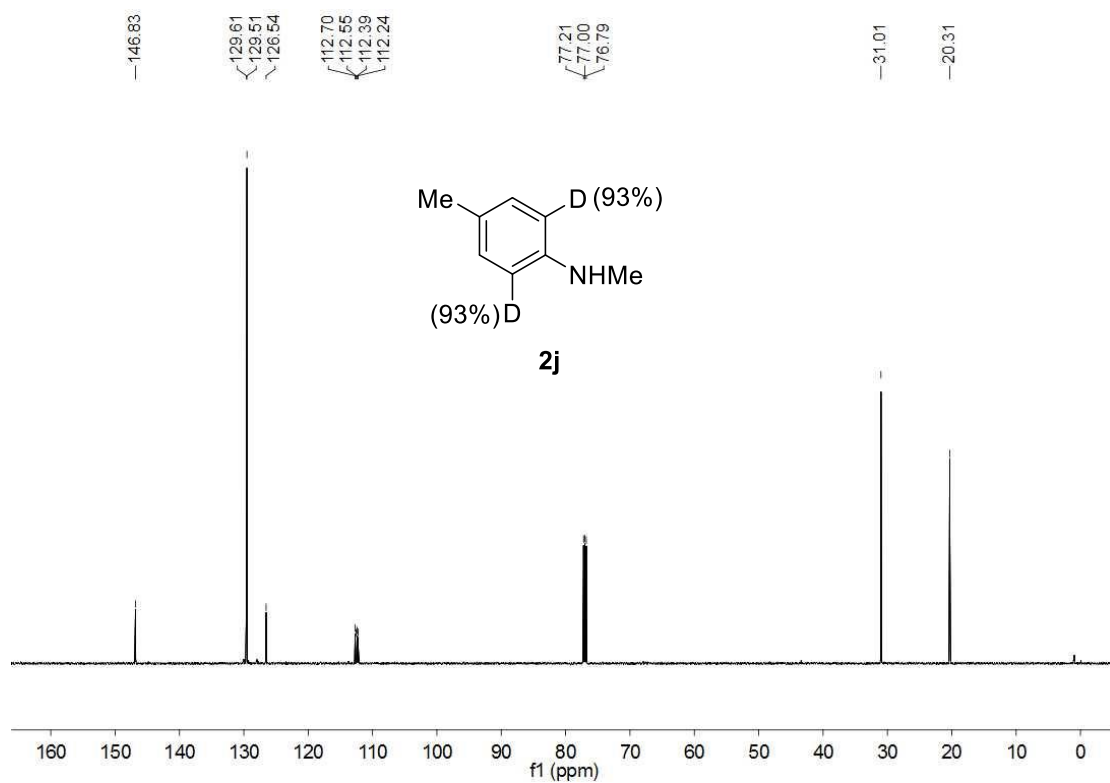

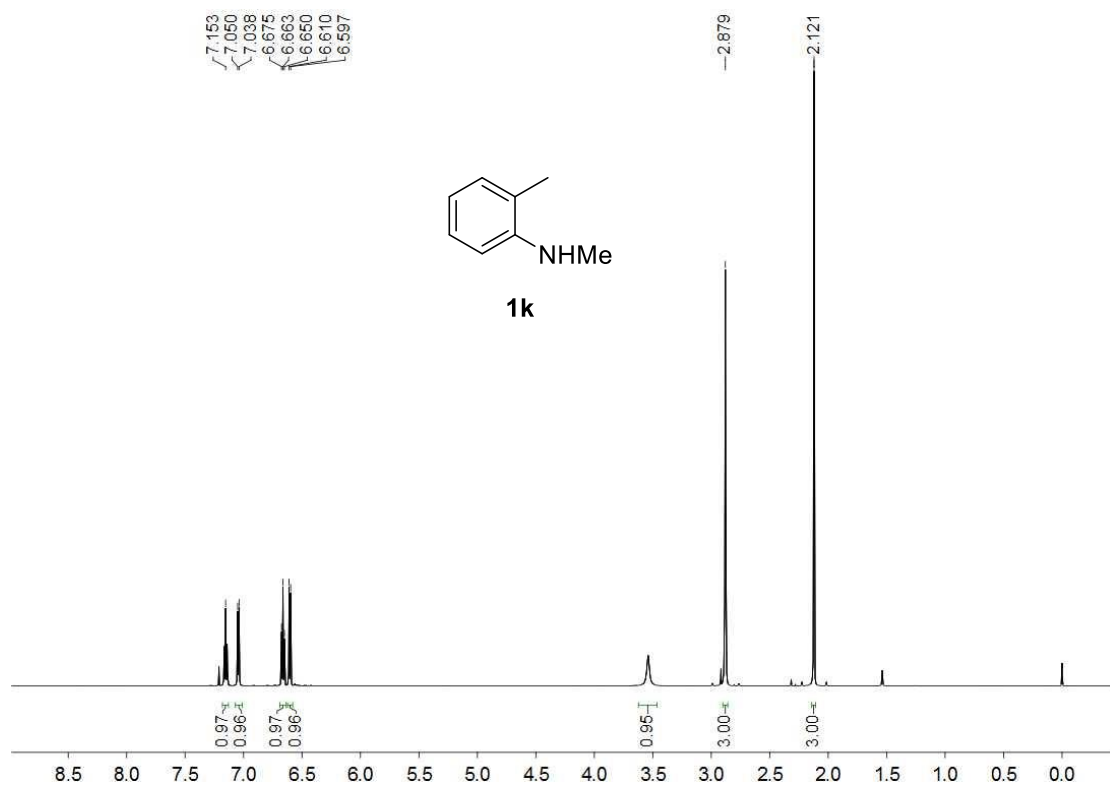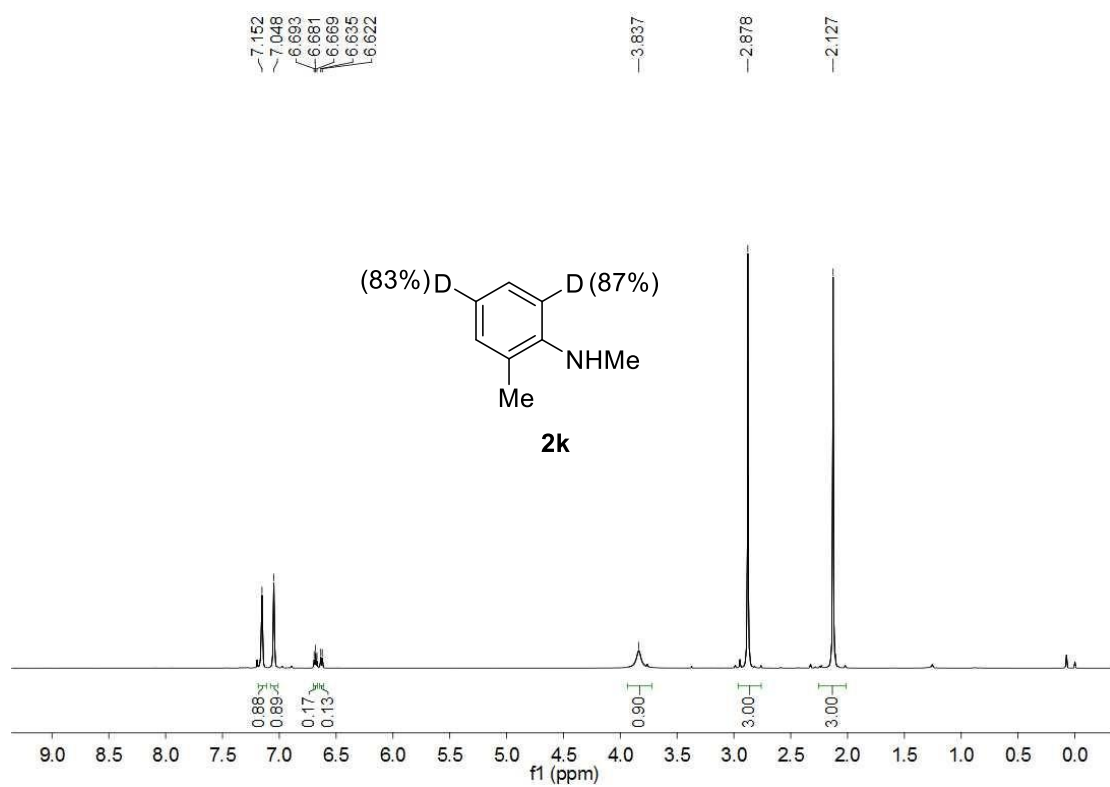

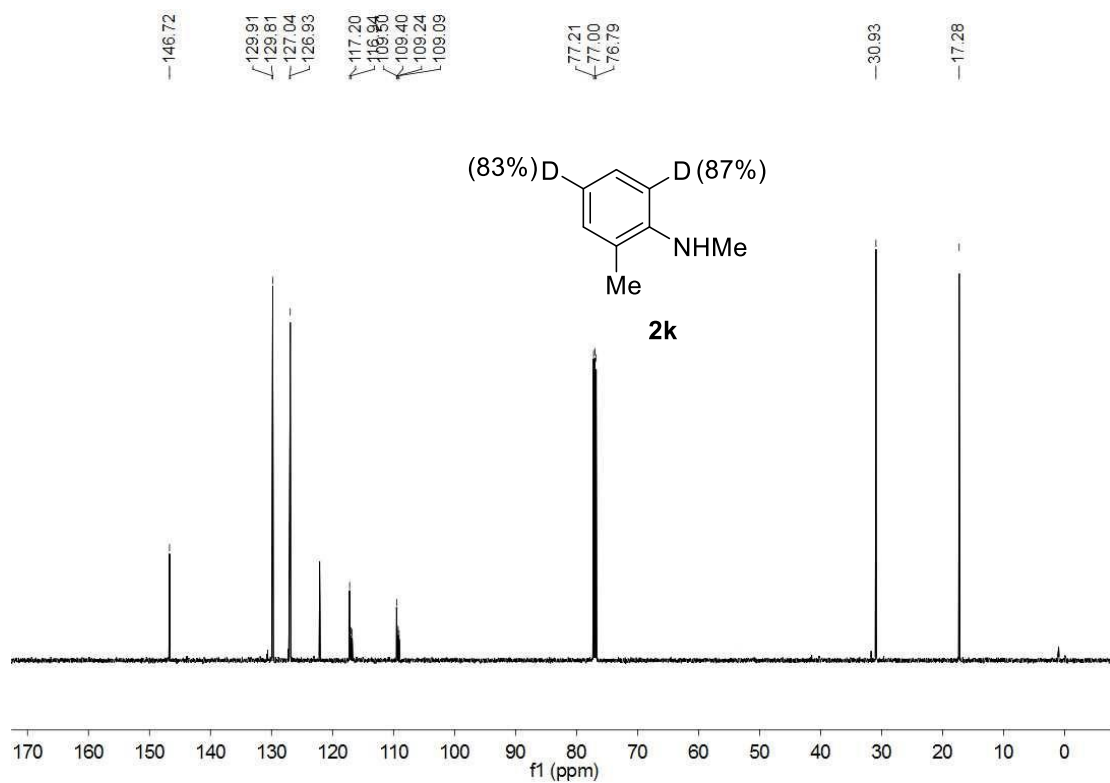

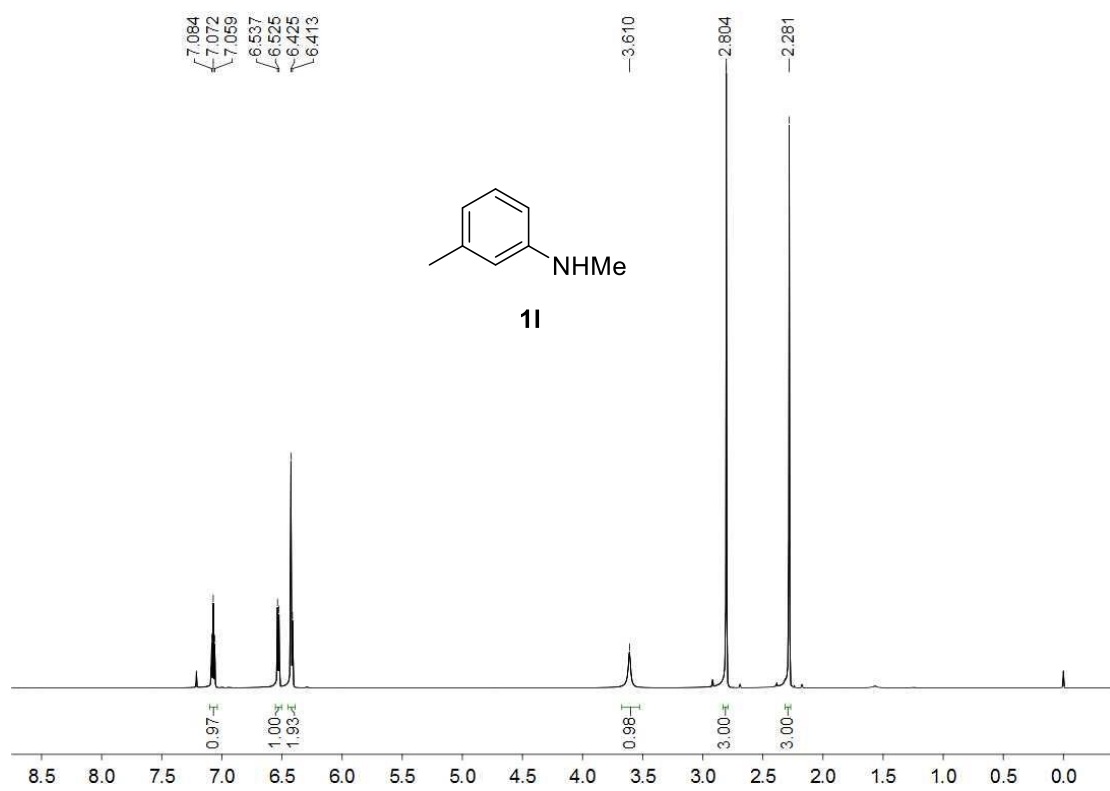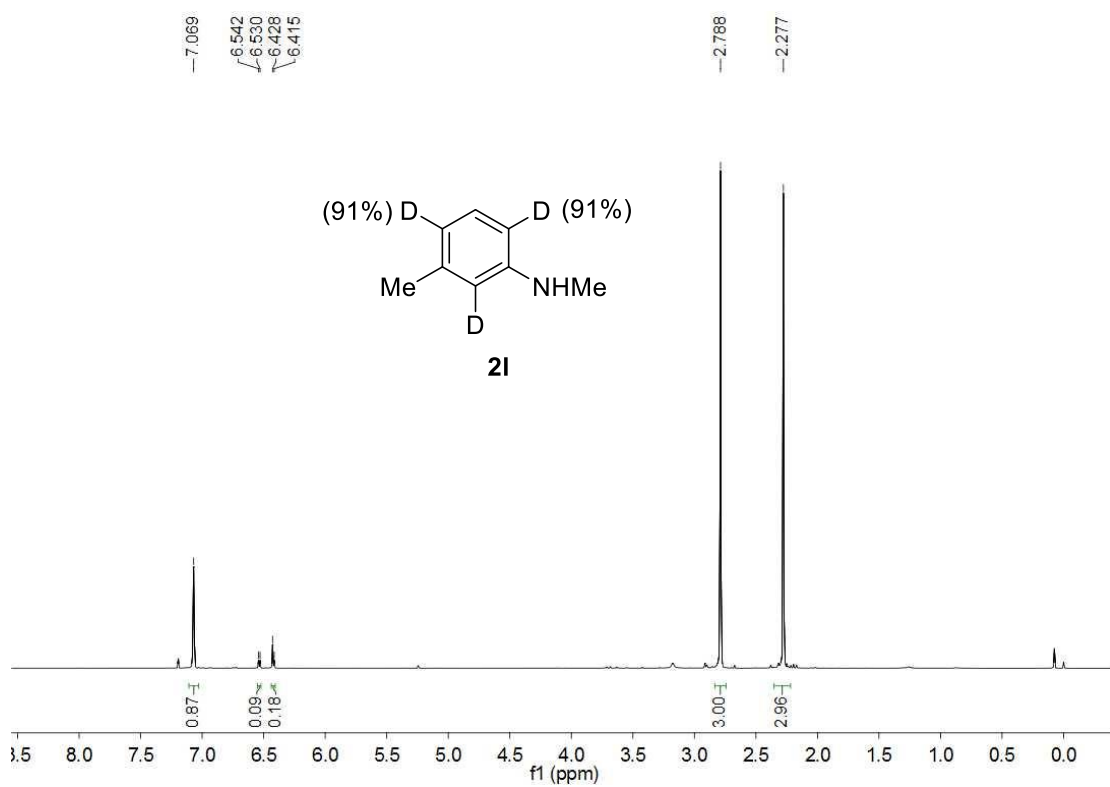

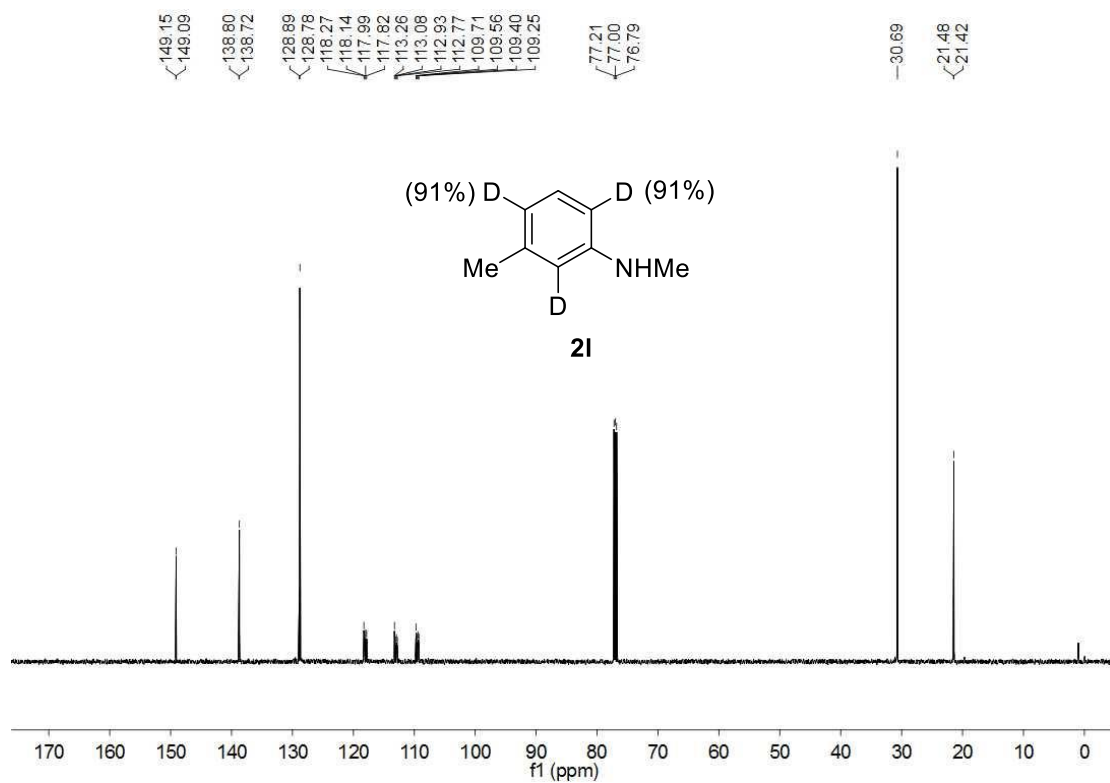

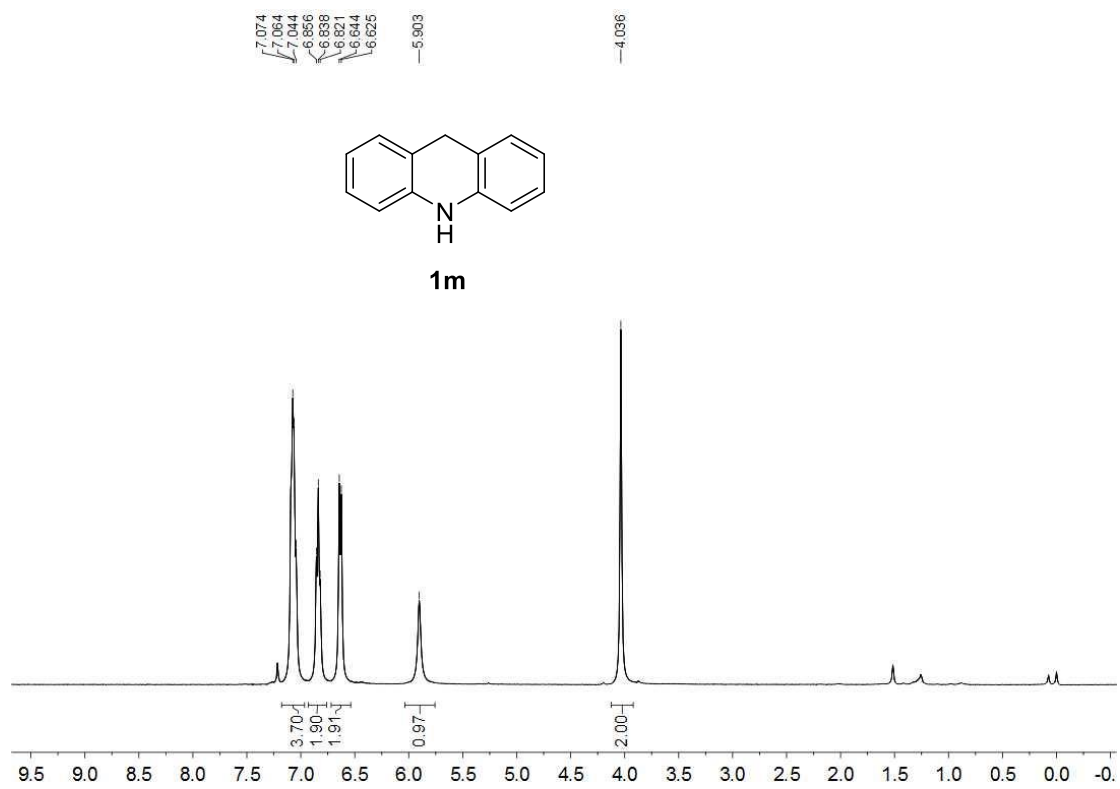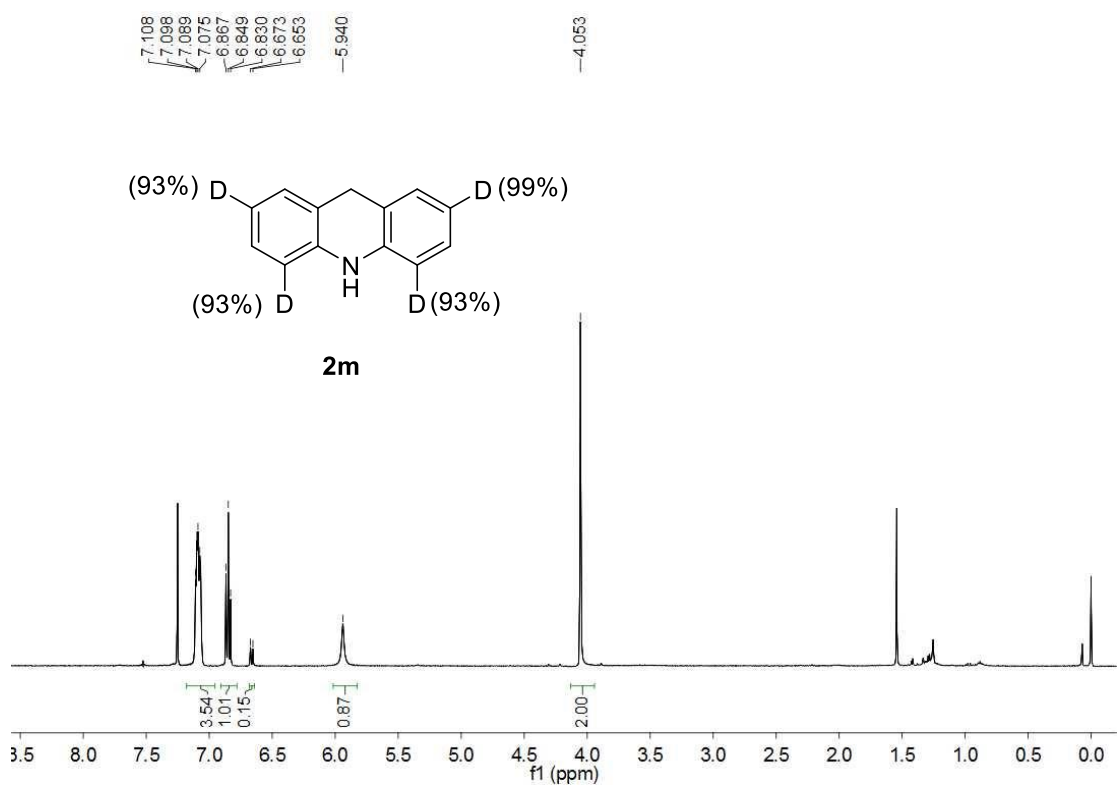



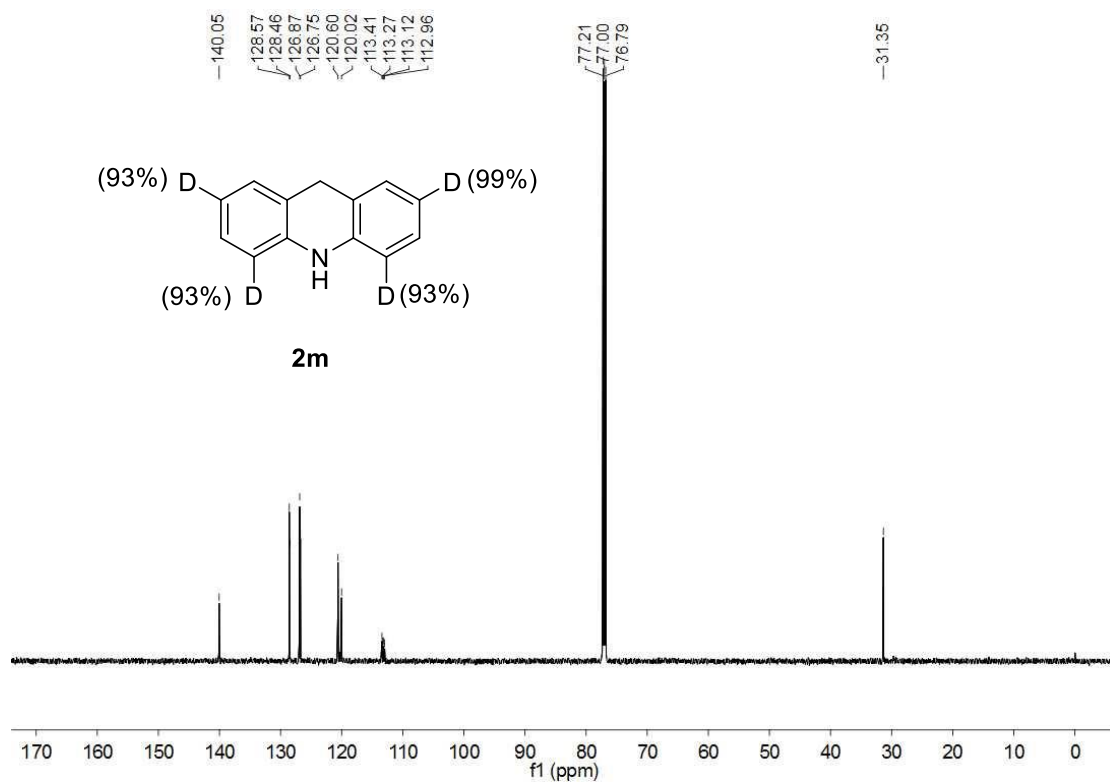

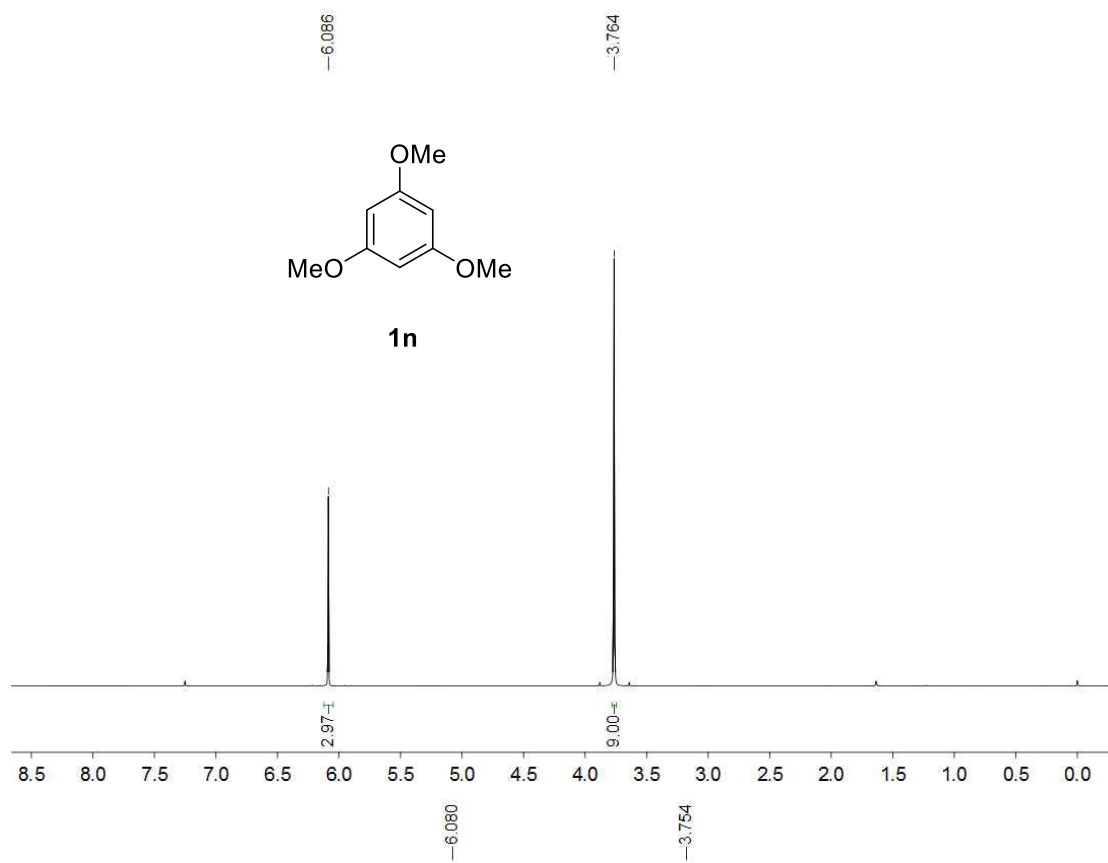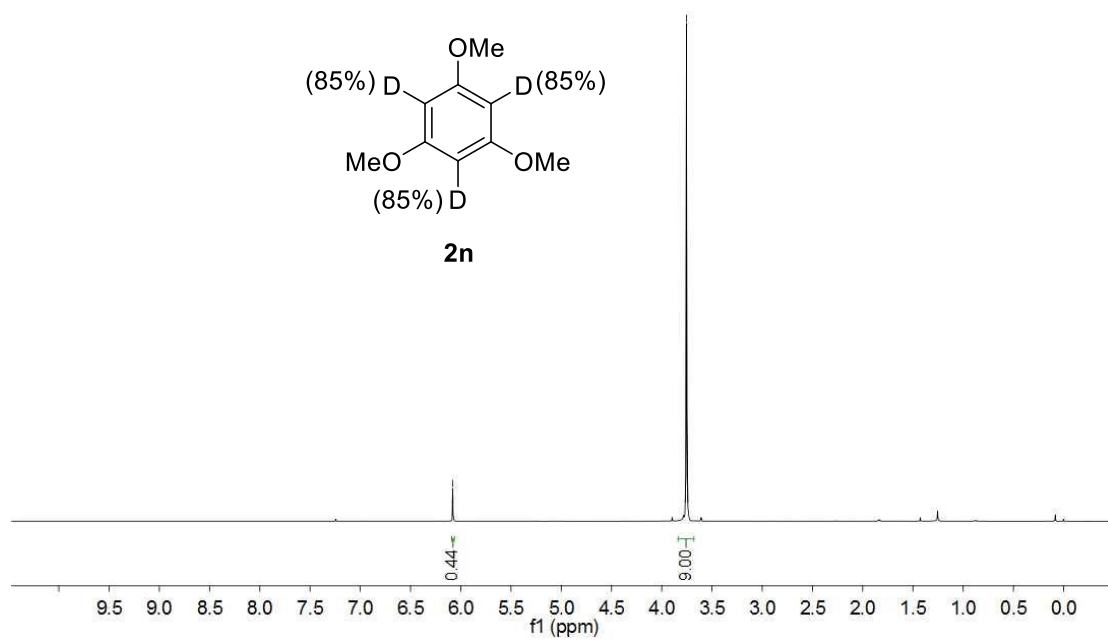

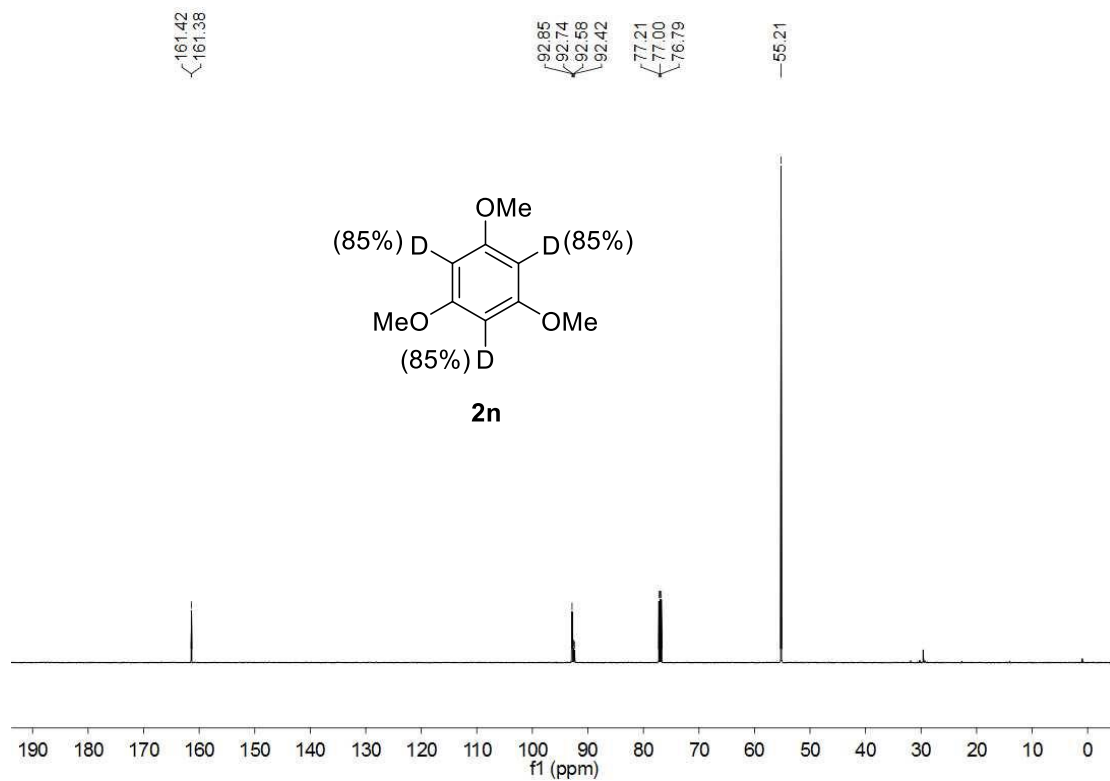

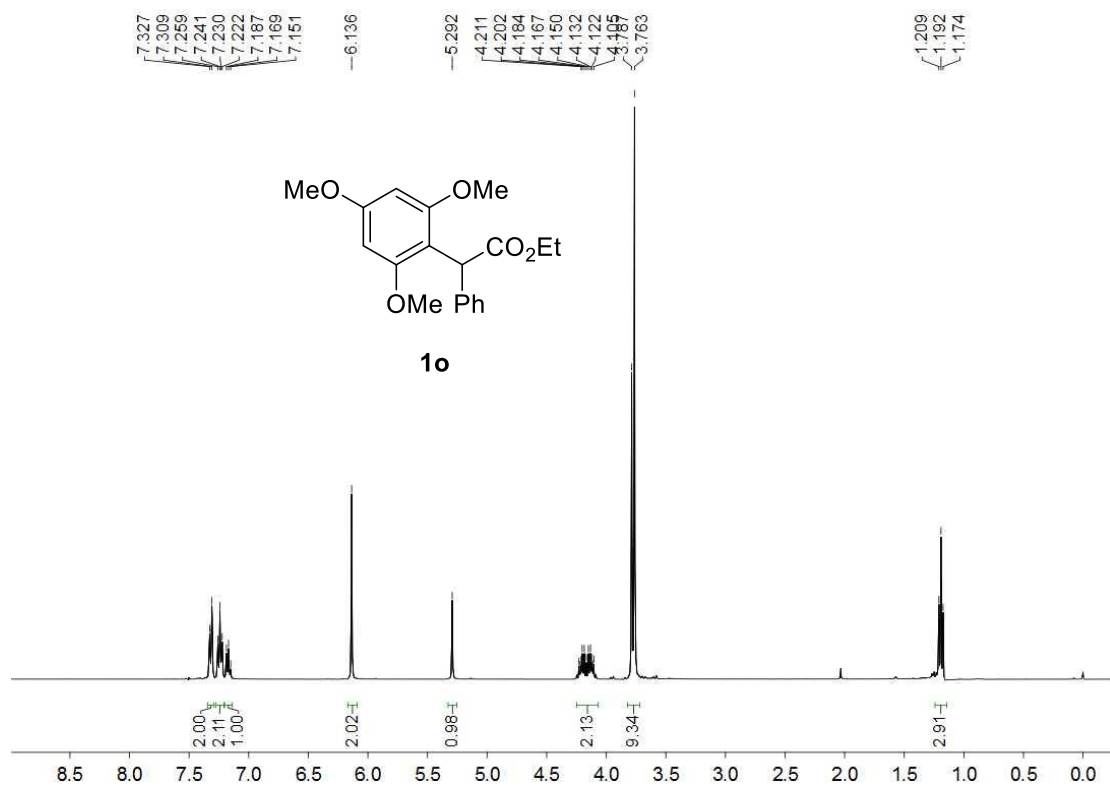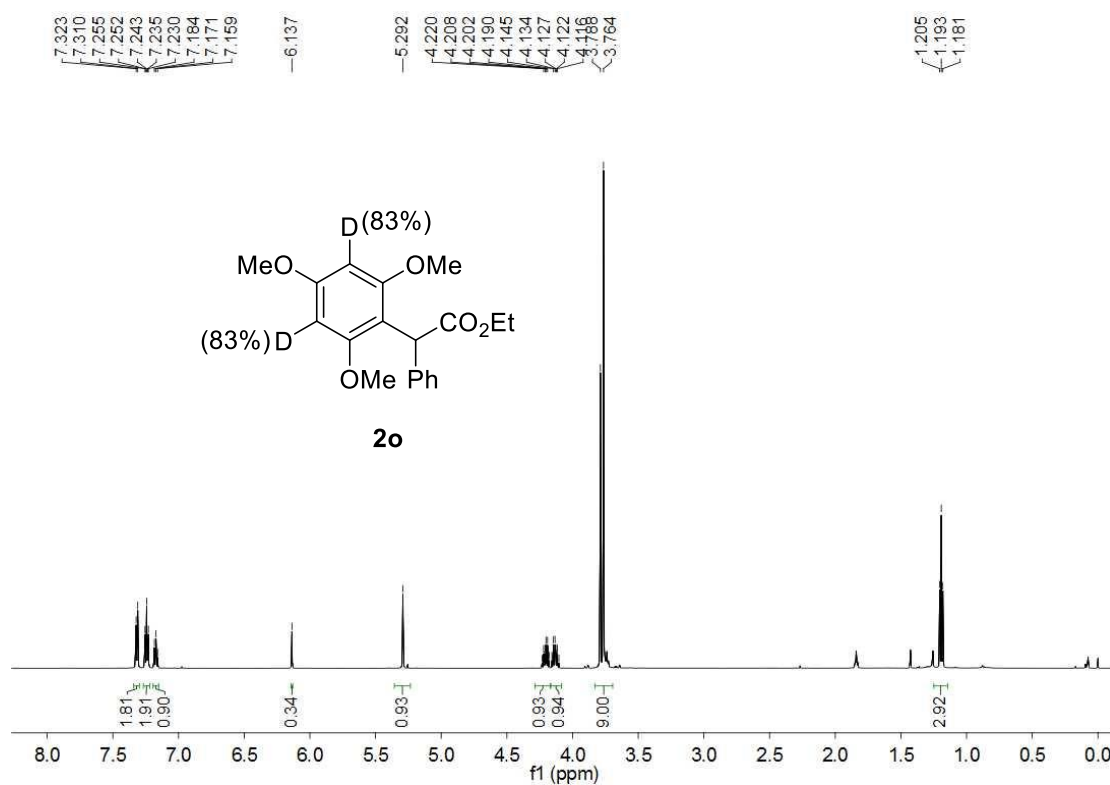

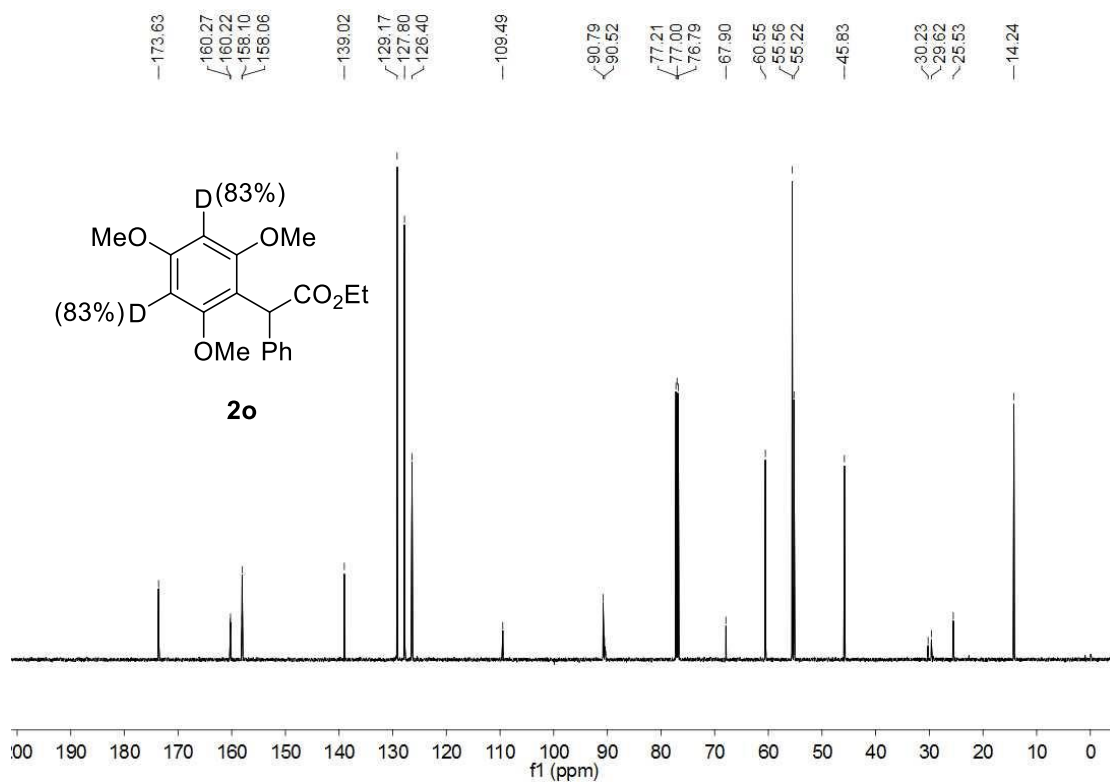

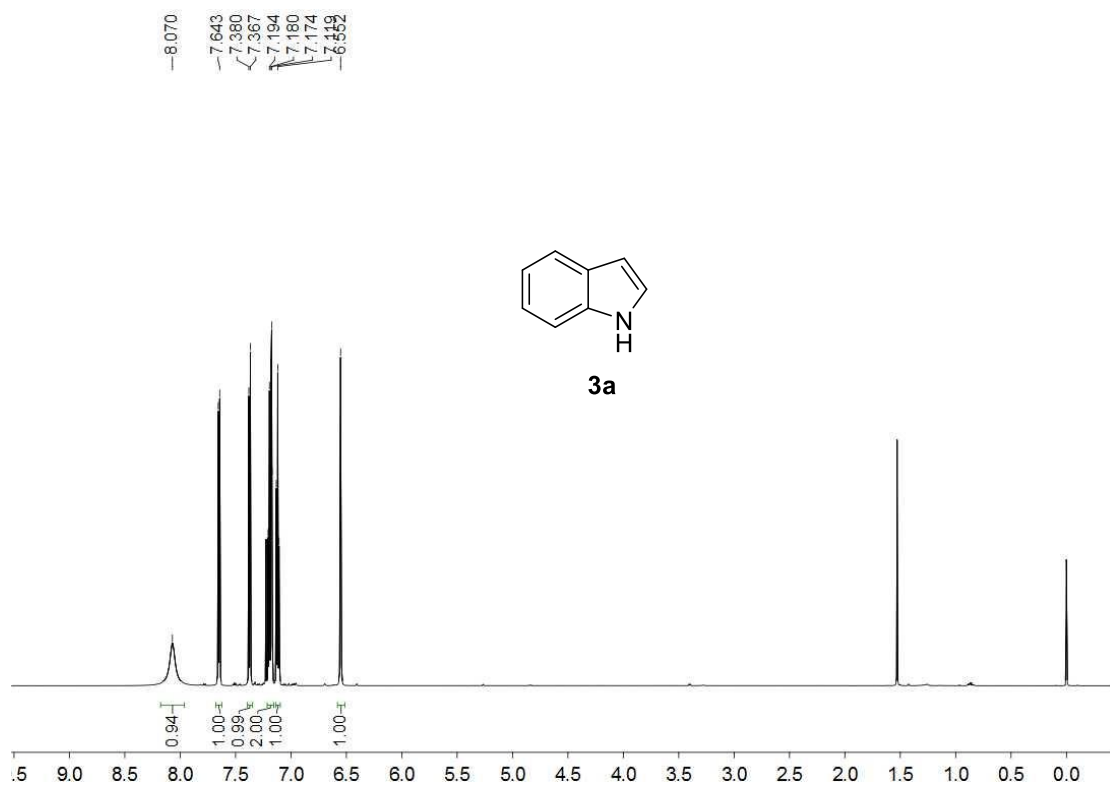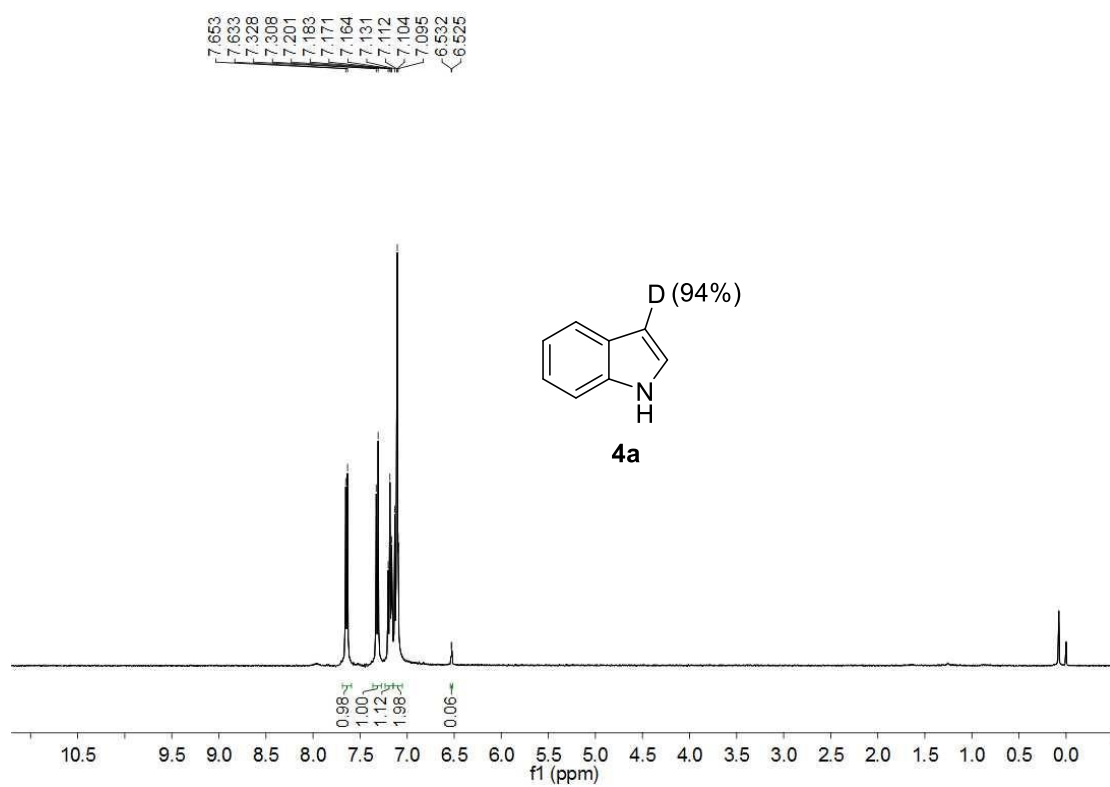

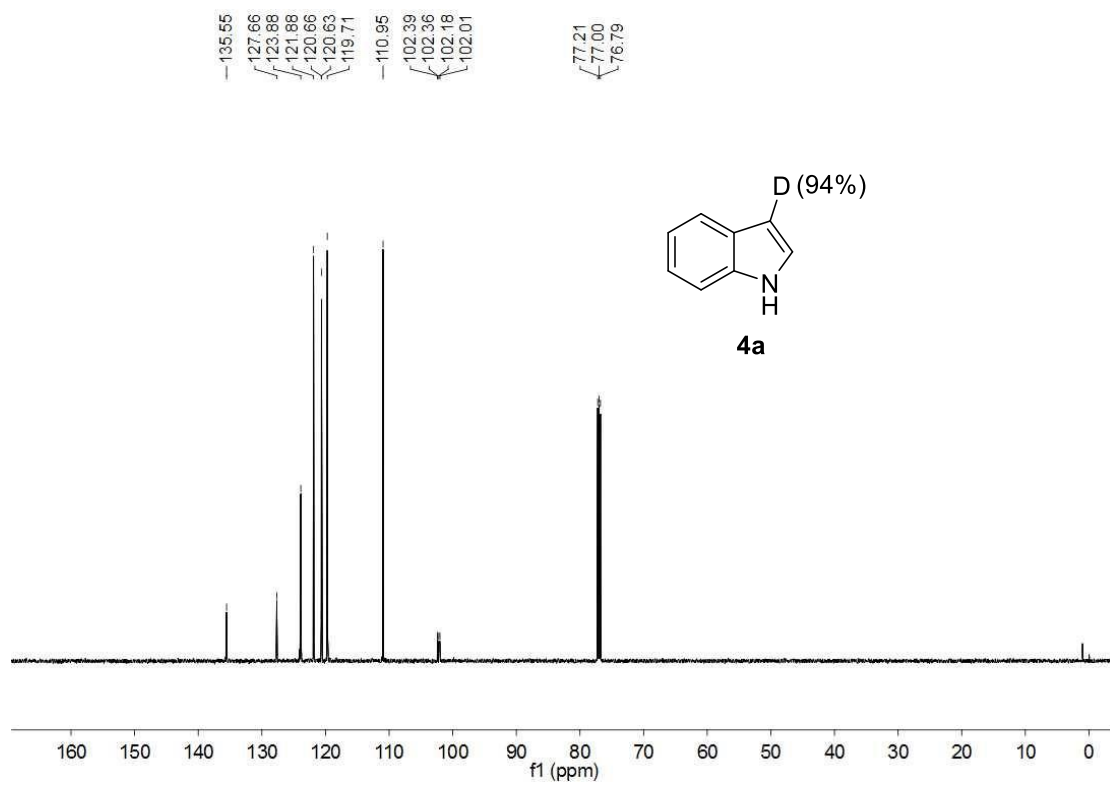

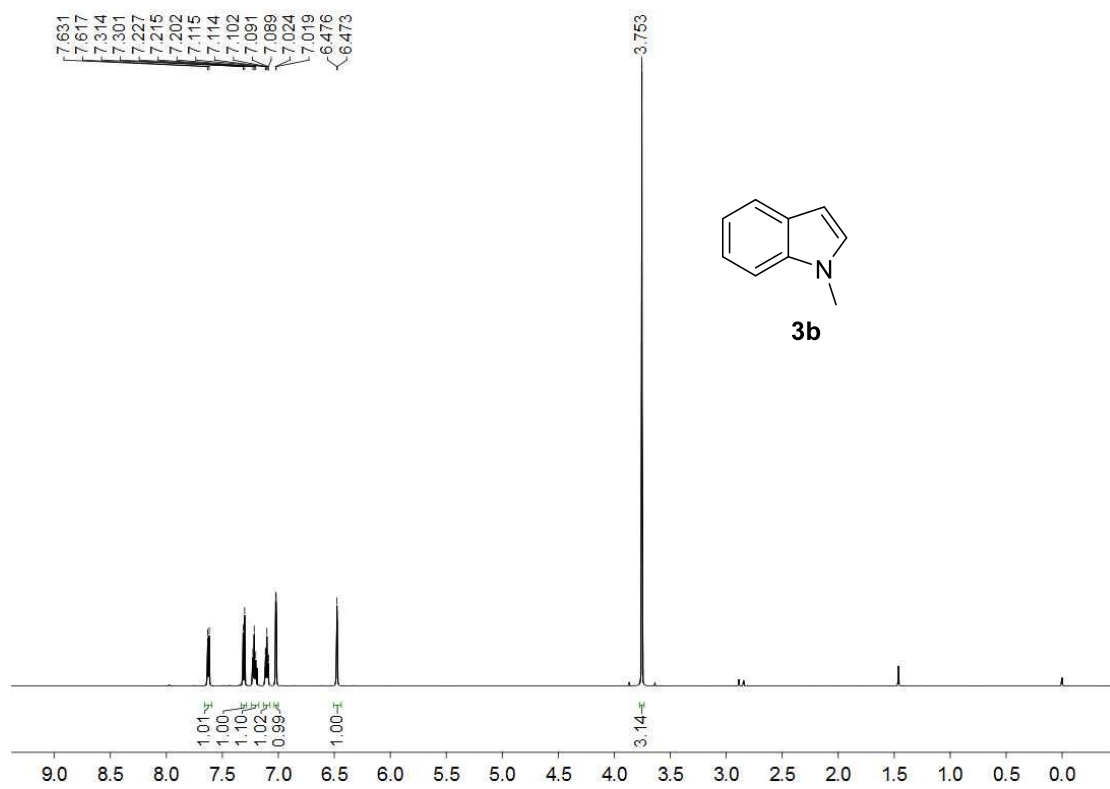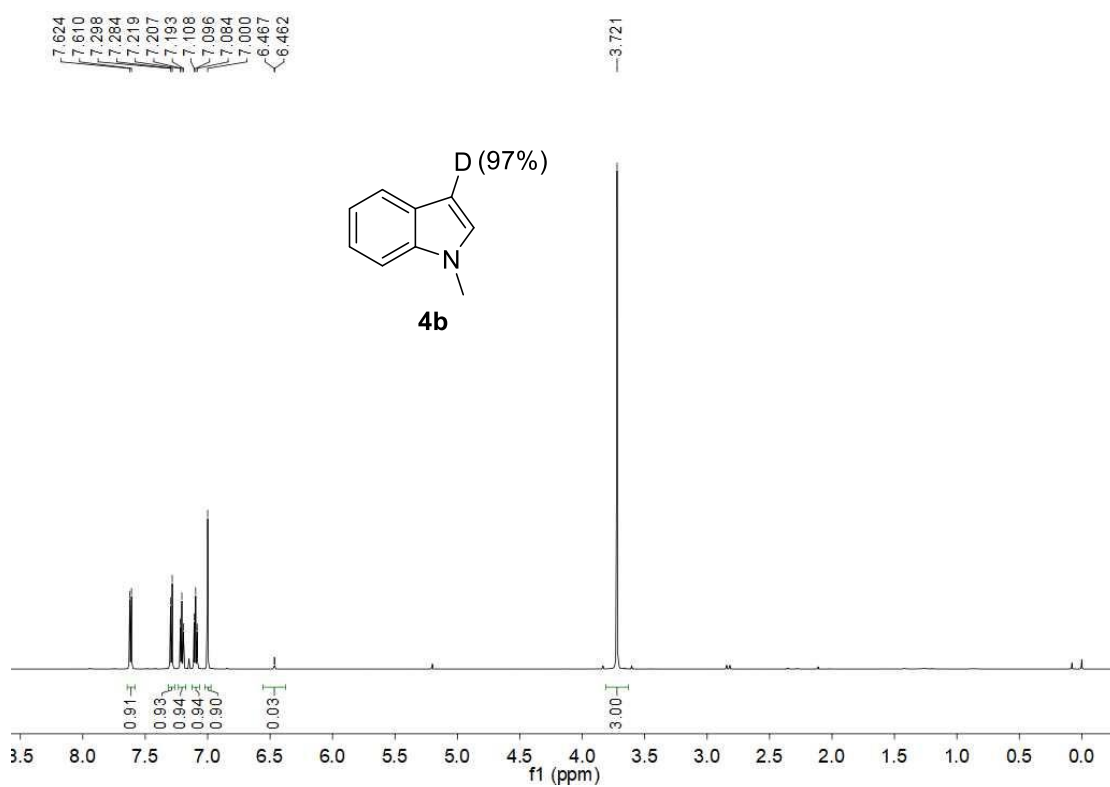



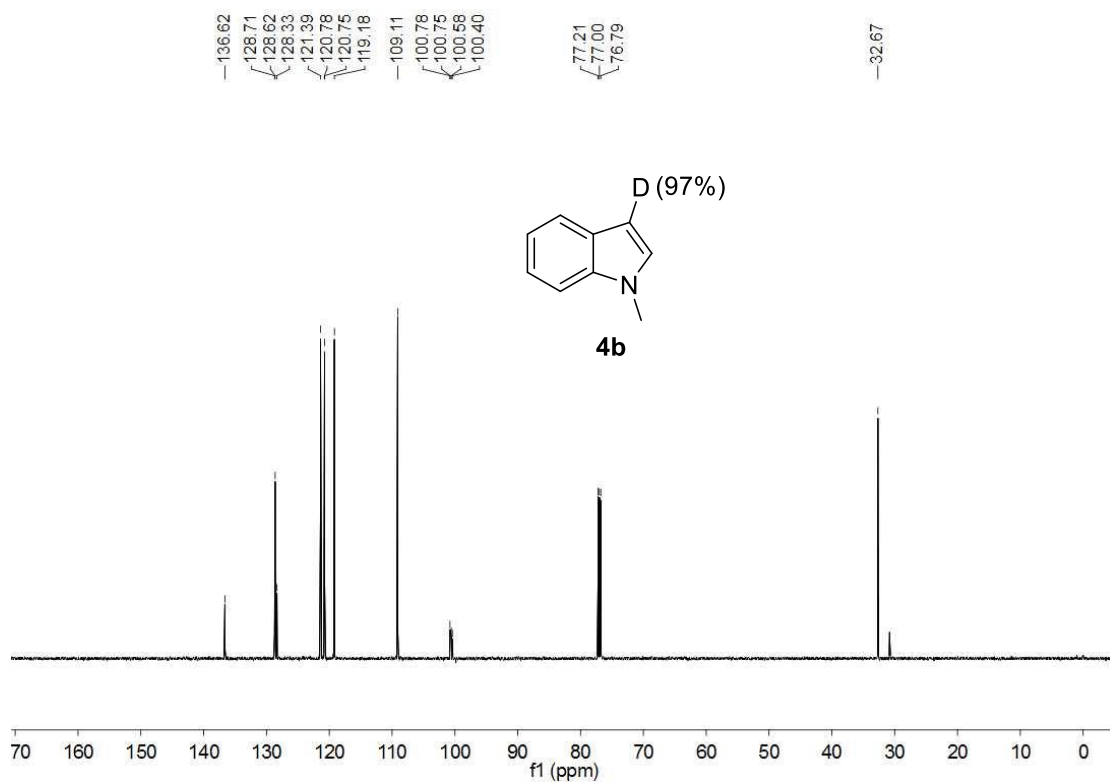

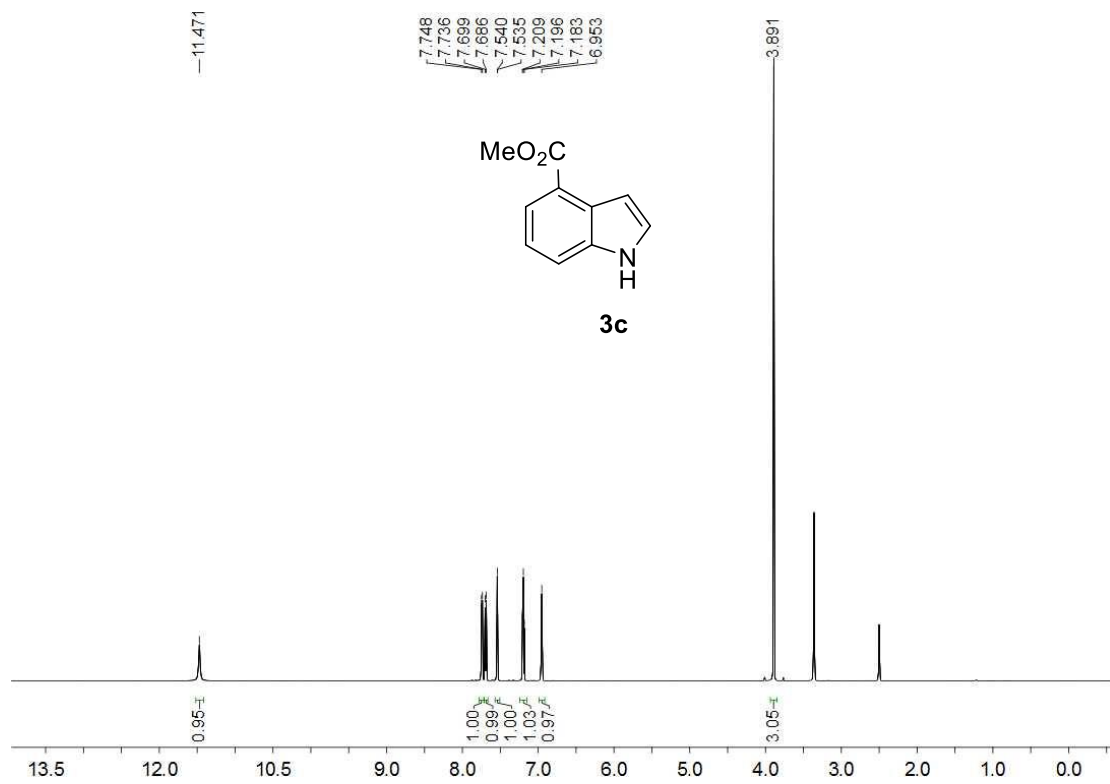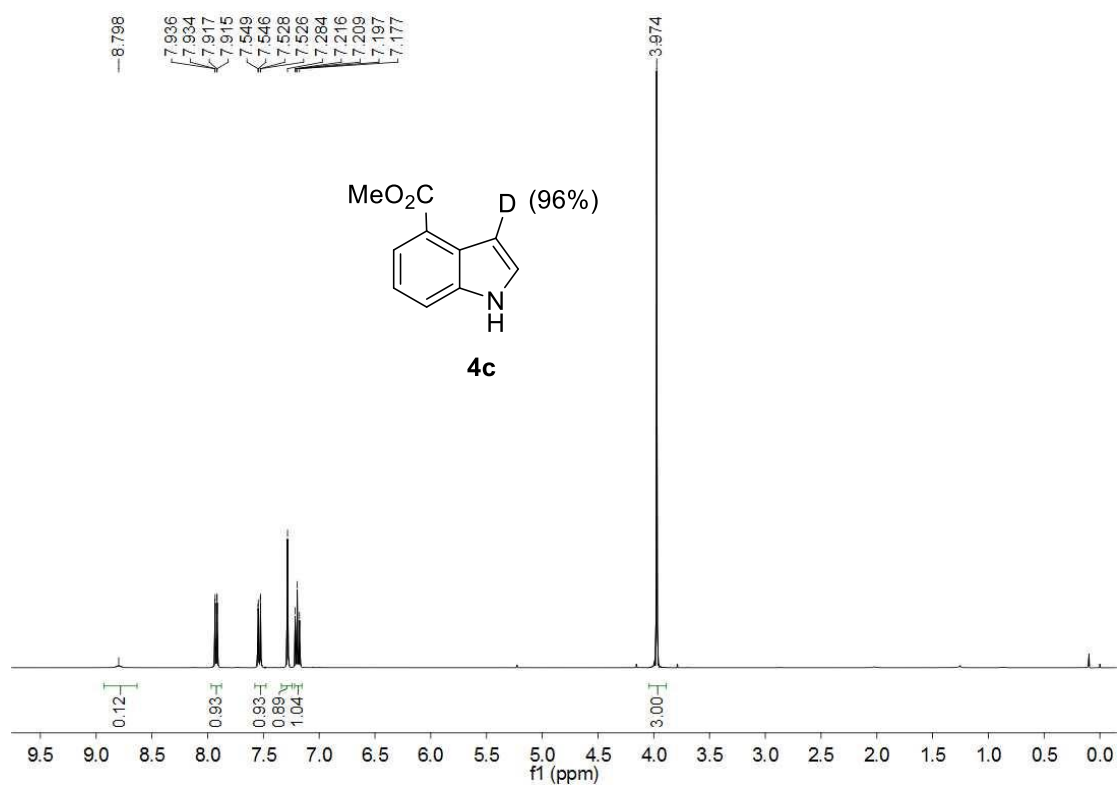

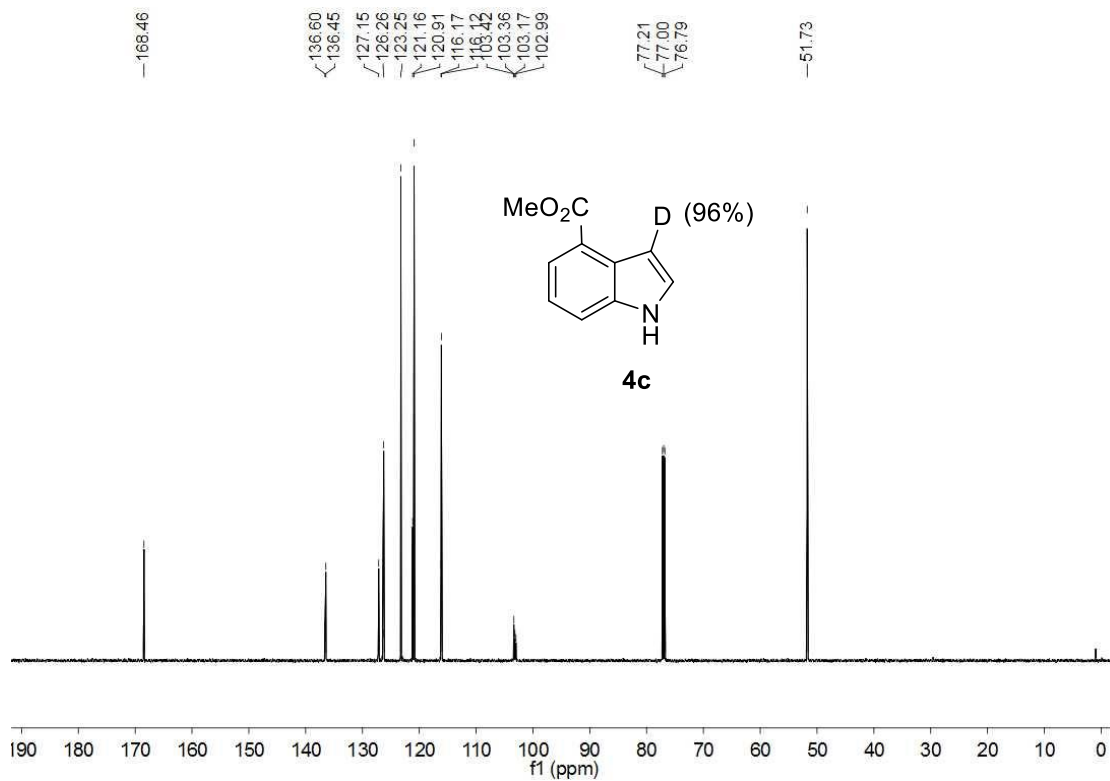

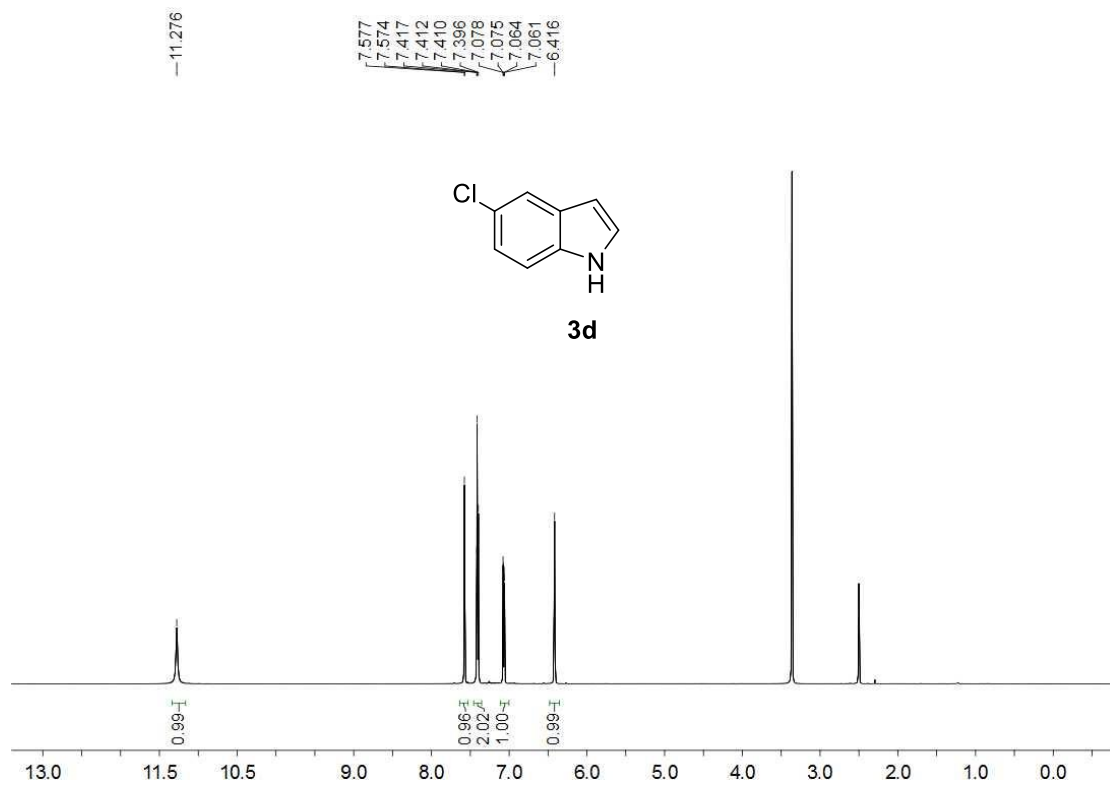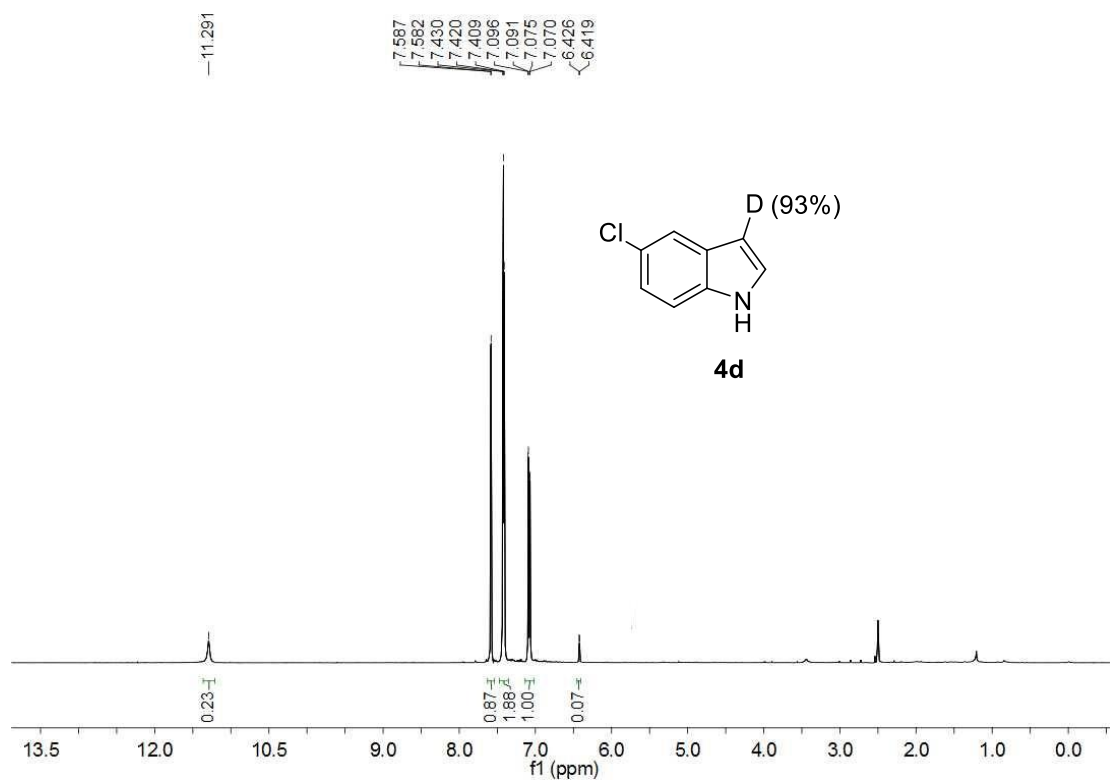

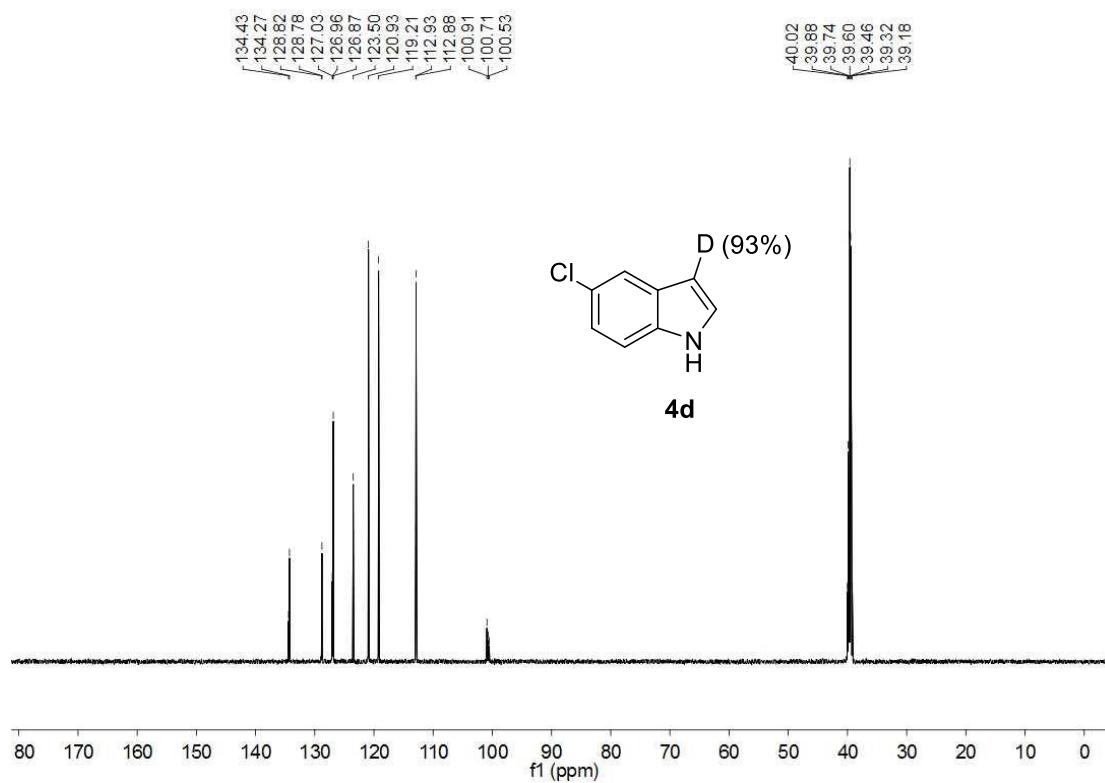

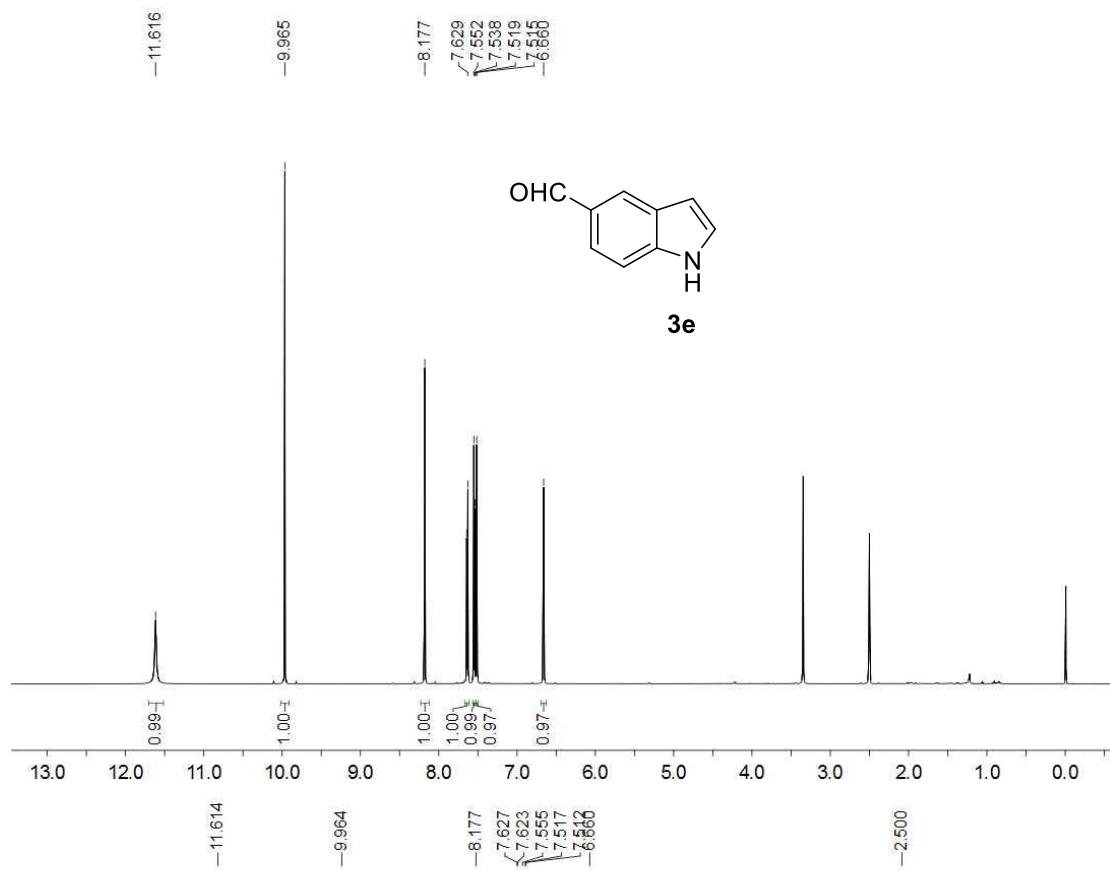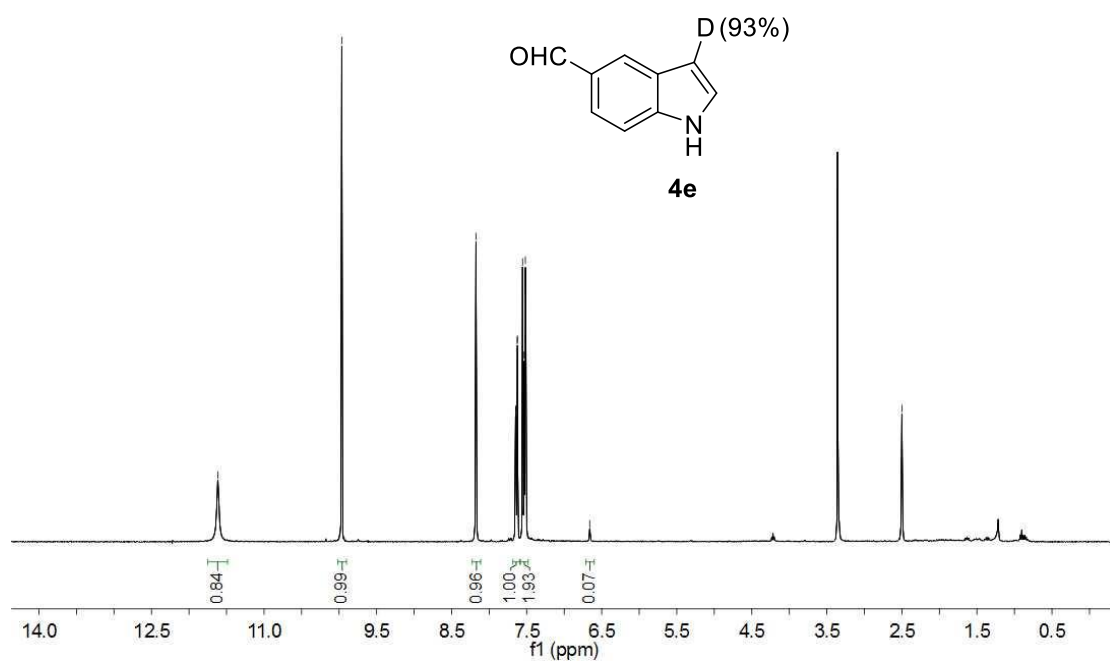

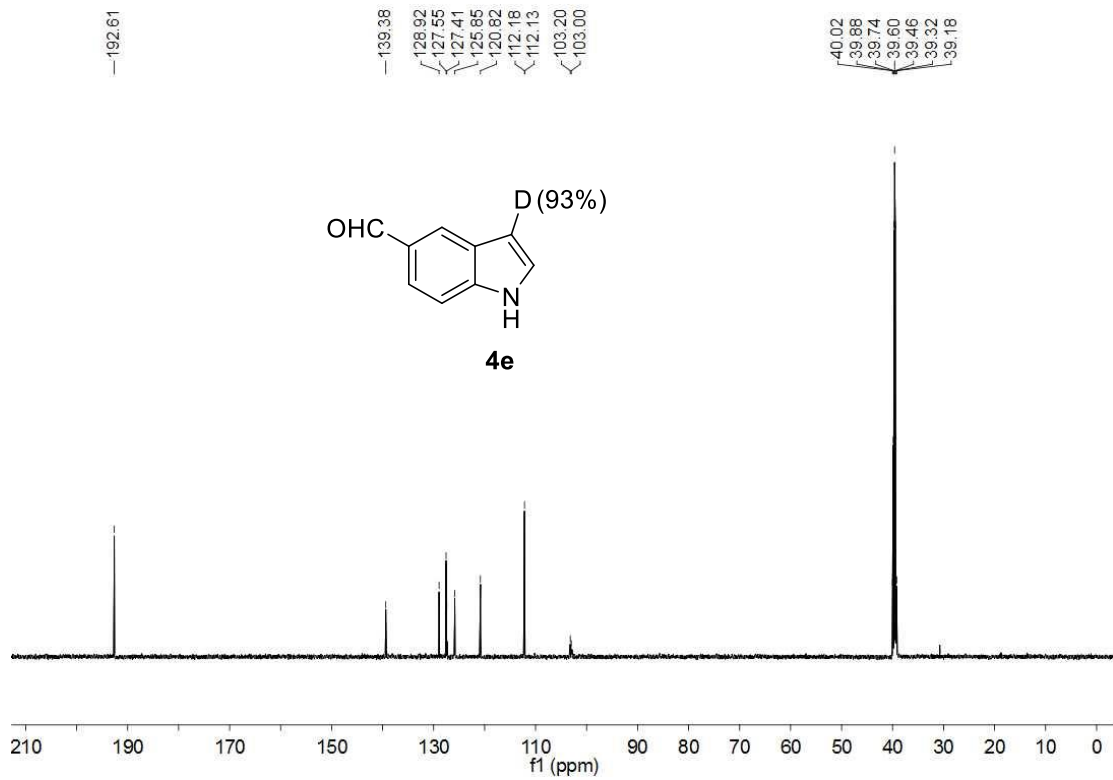

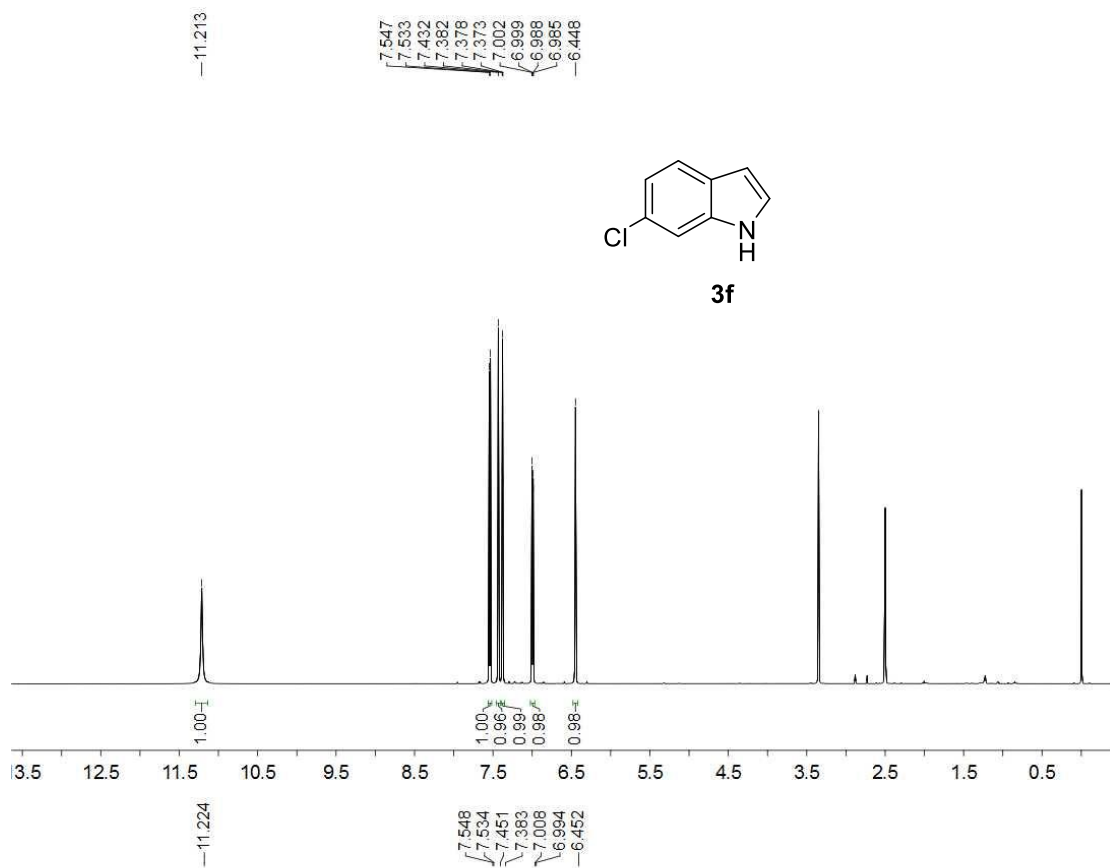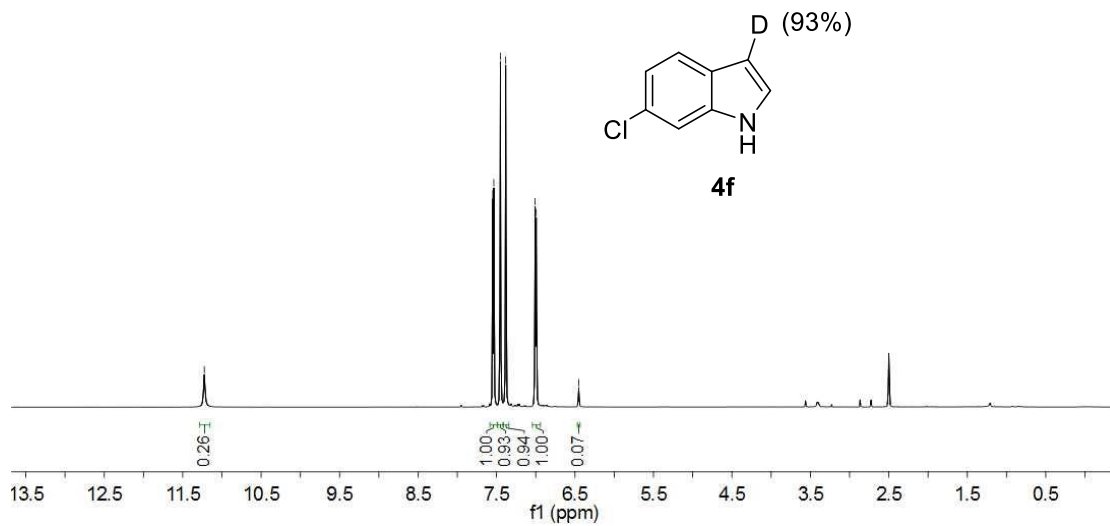



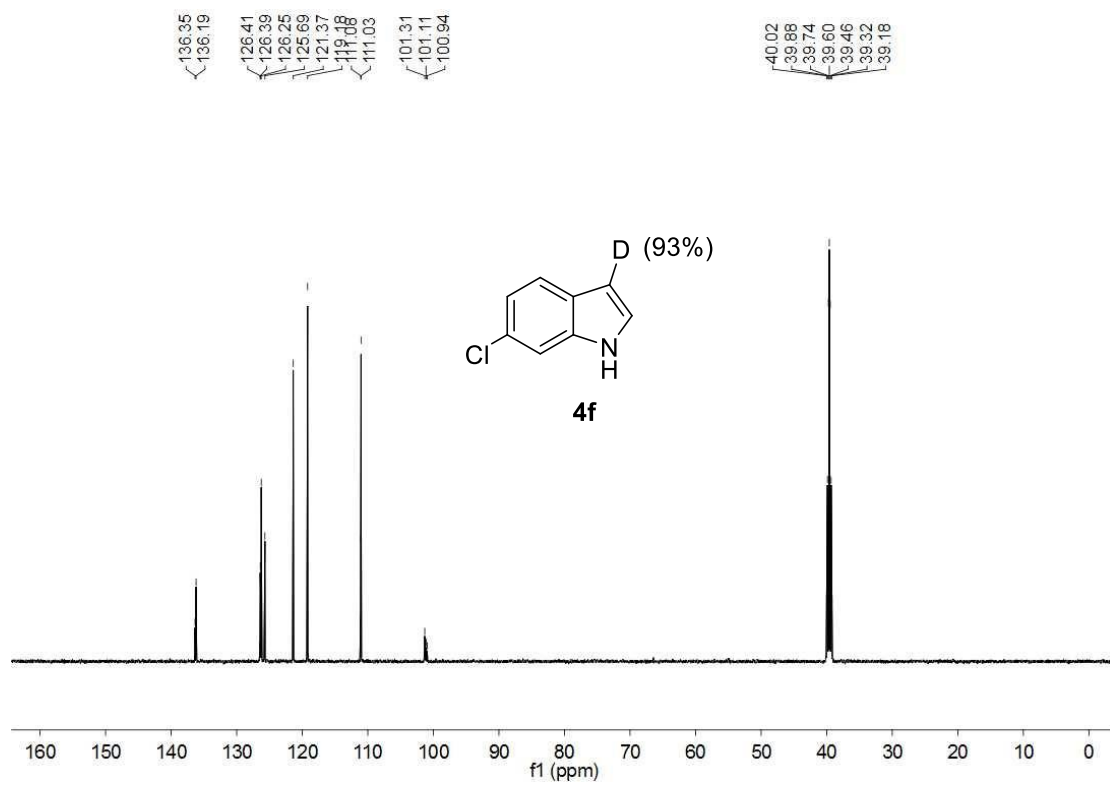

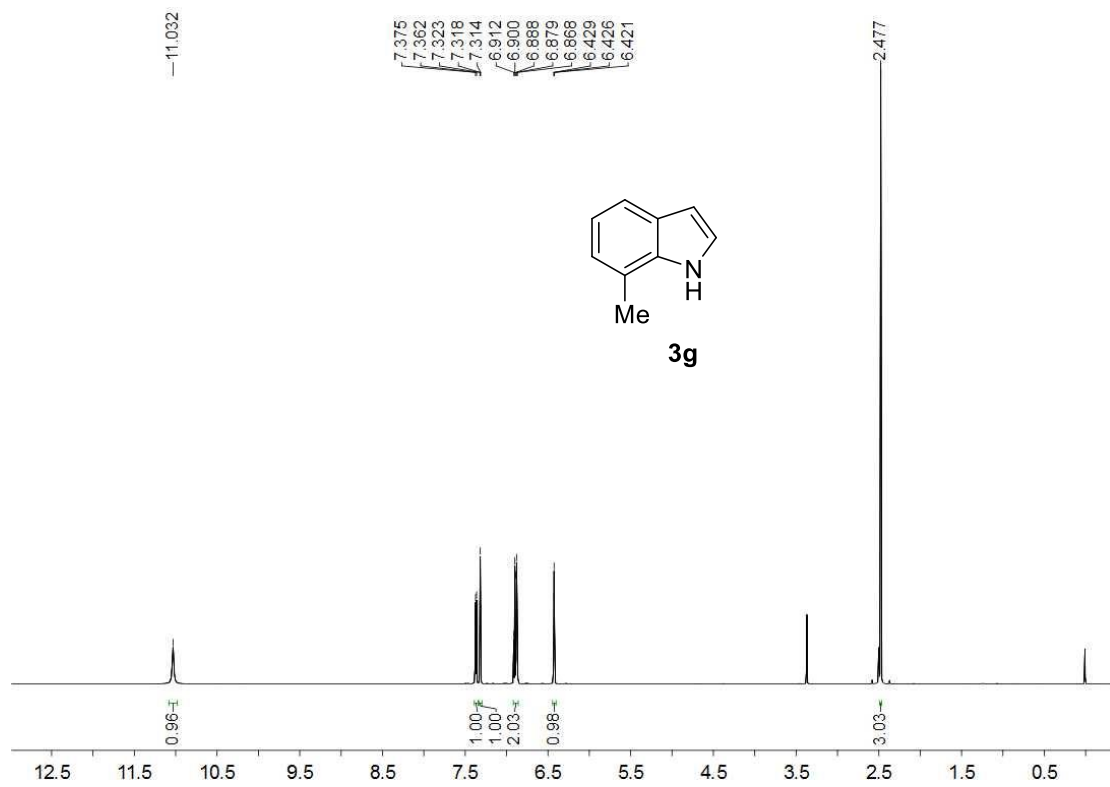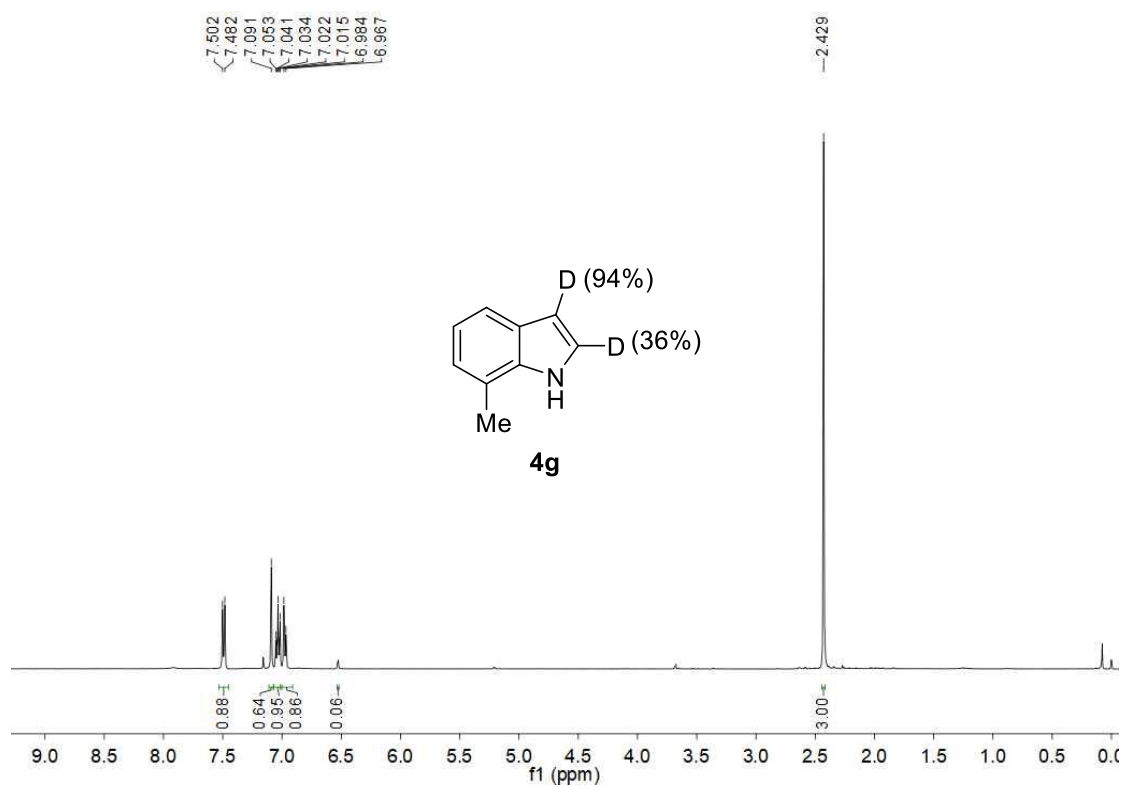

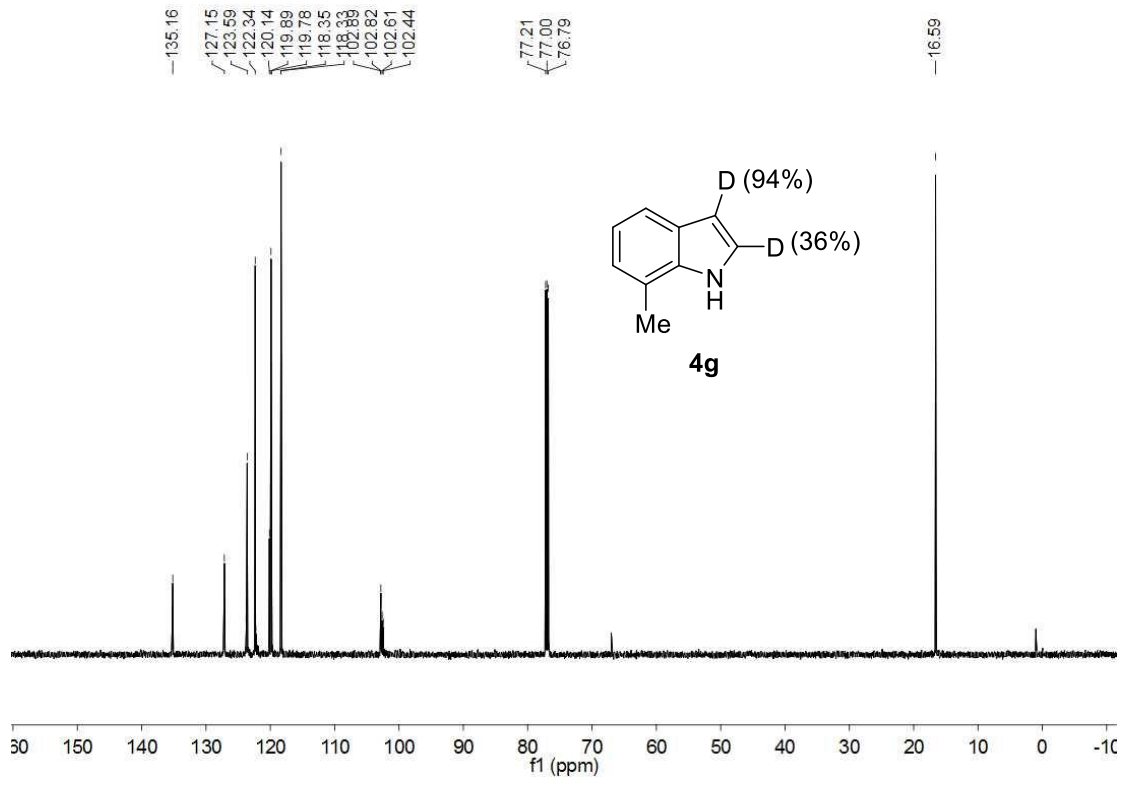

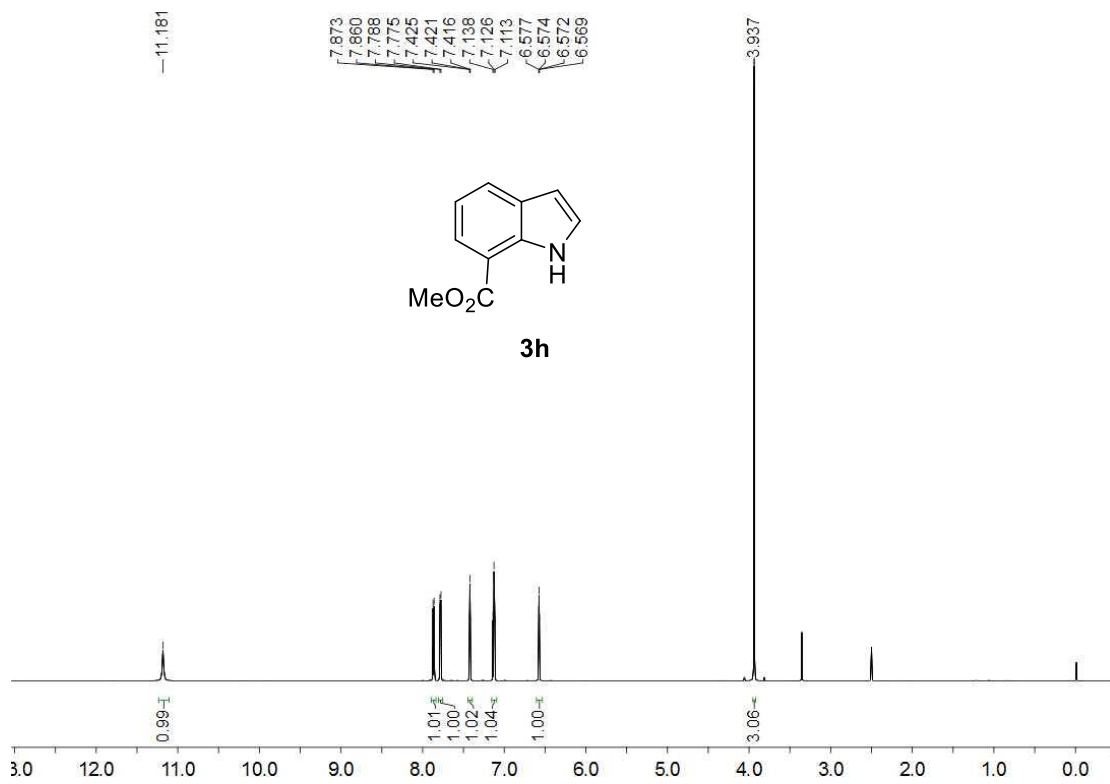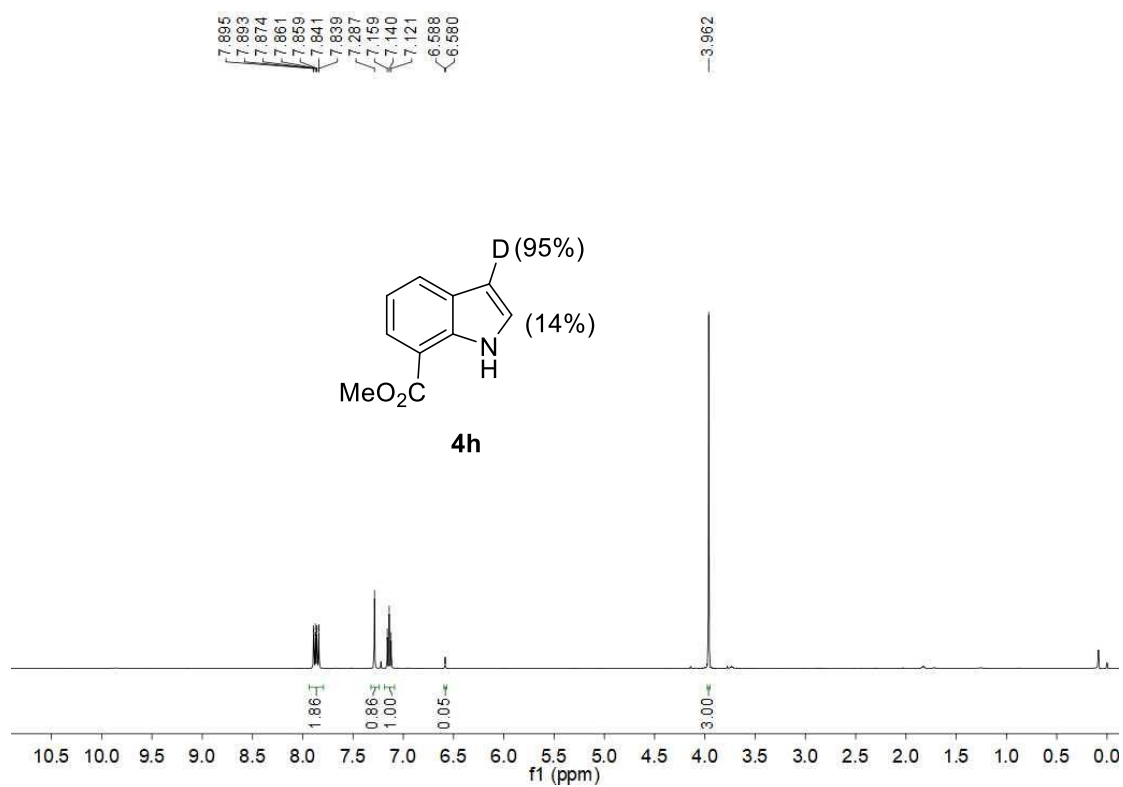

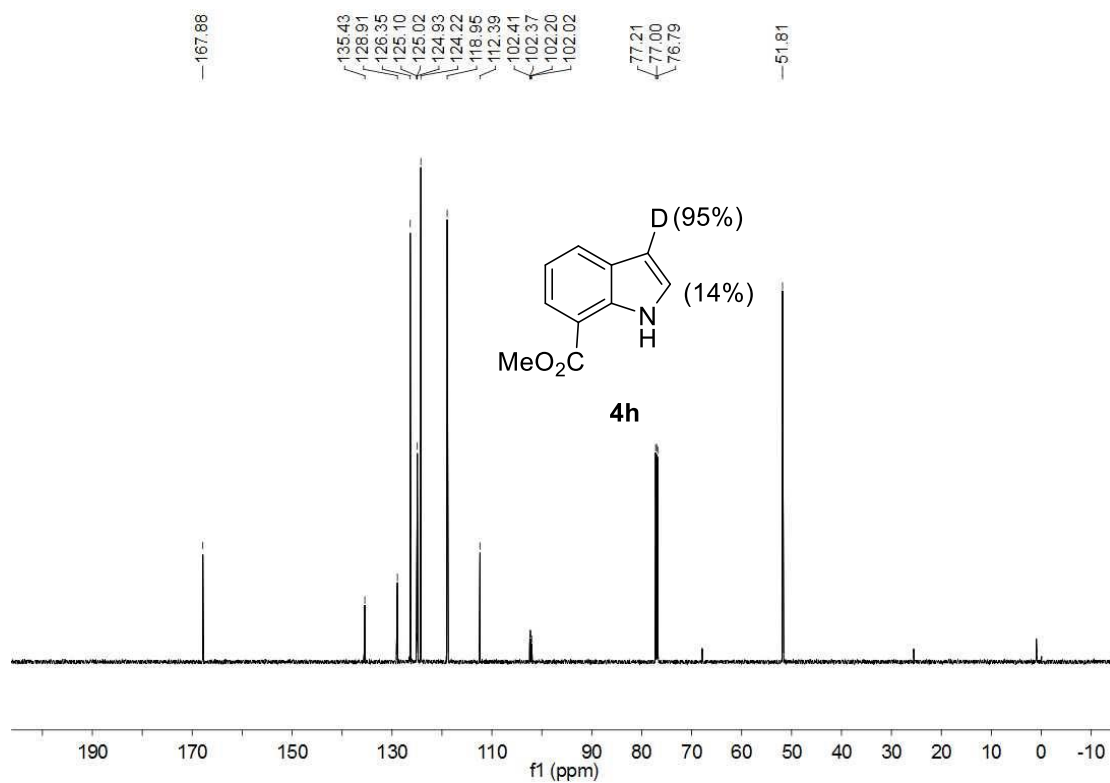

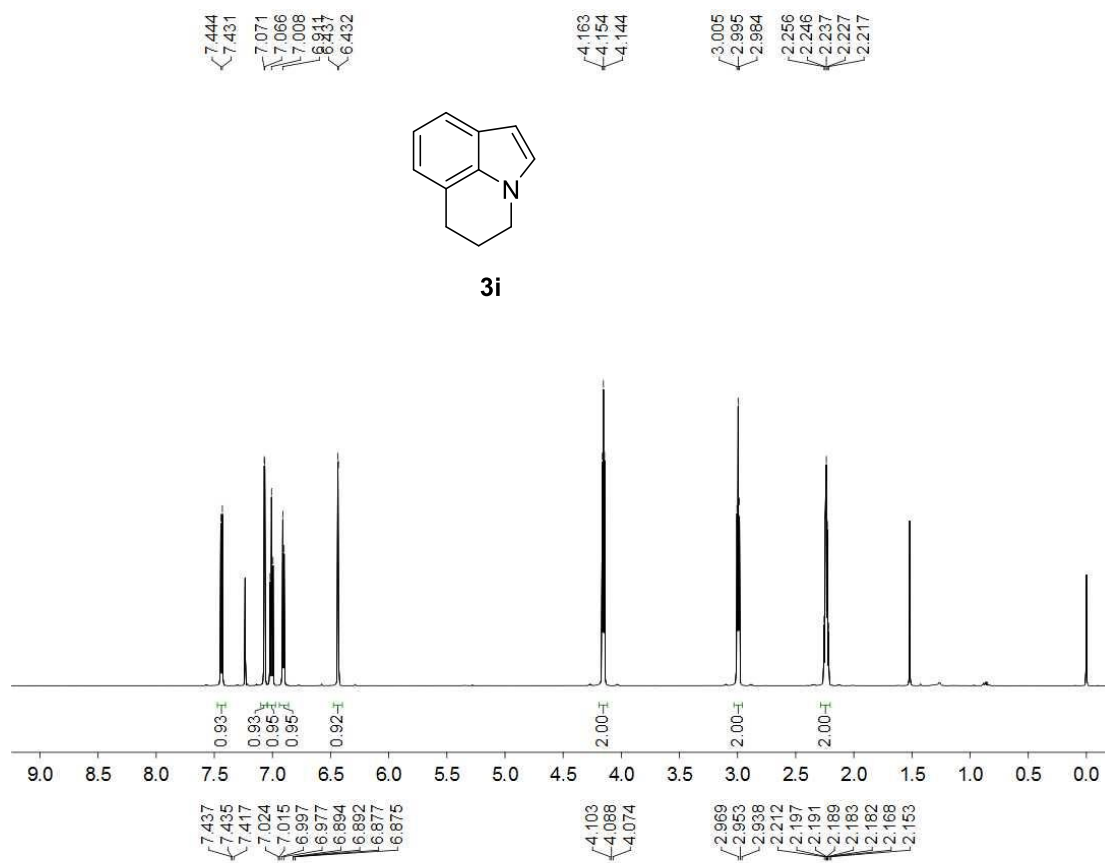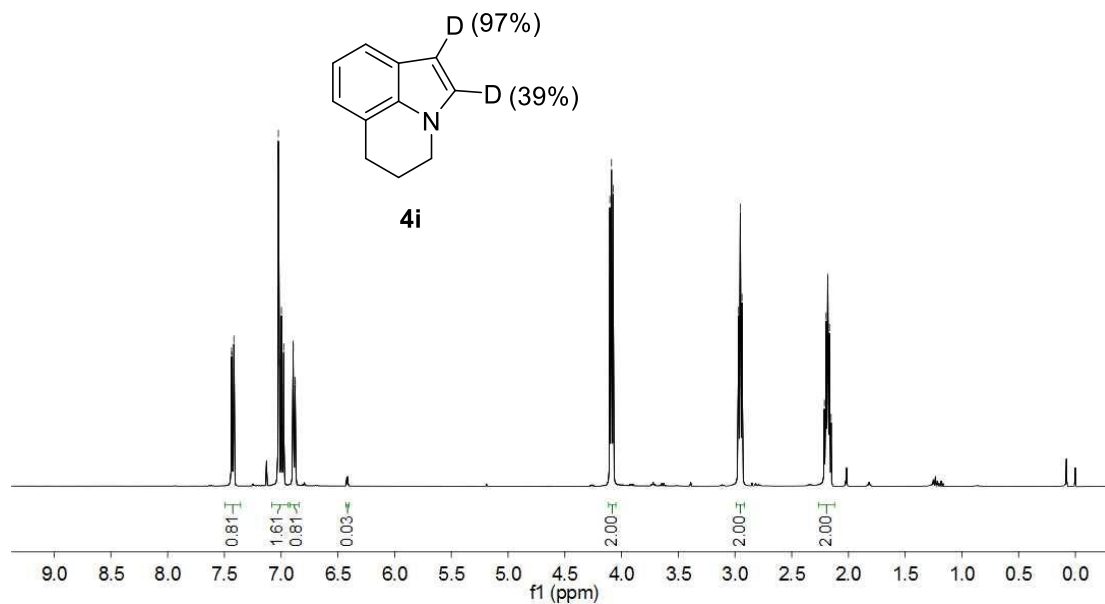

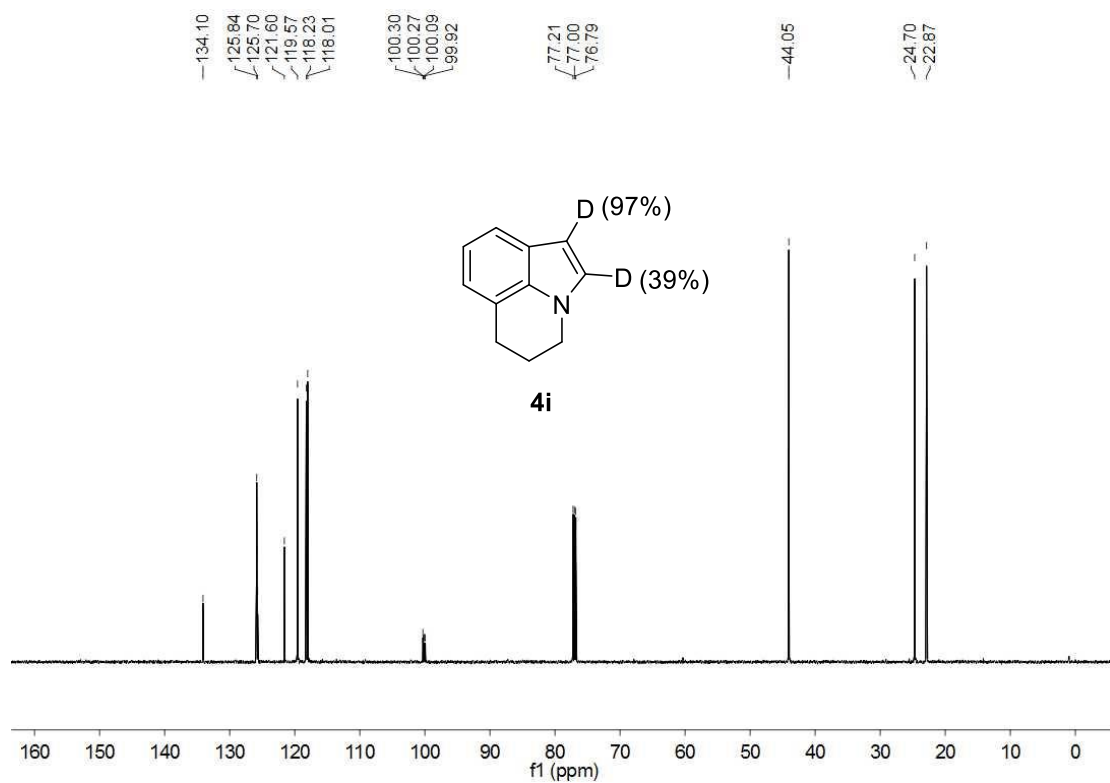

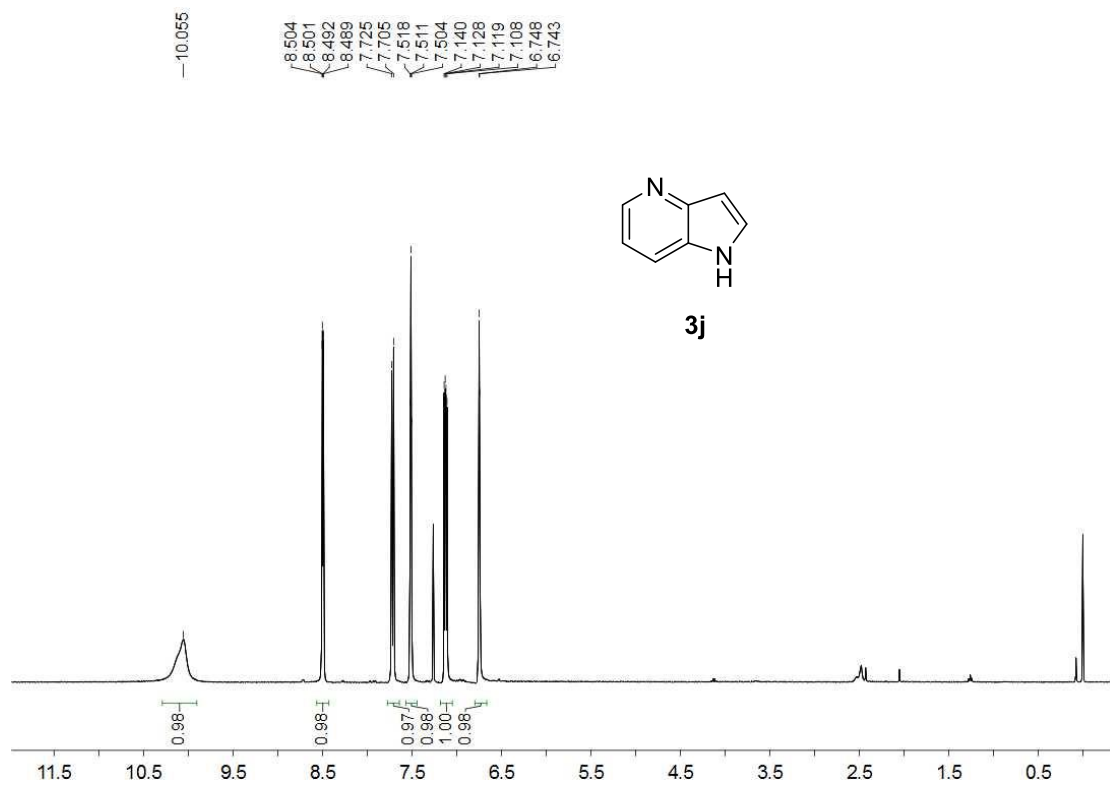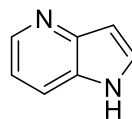

3j

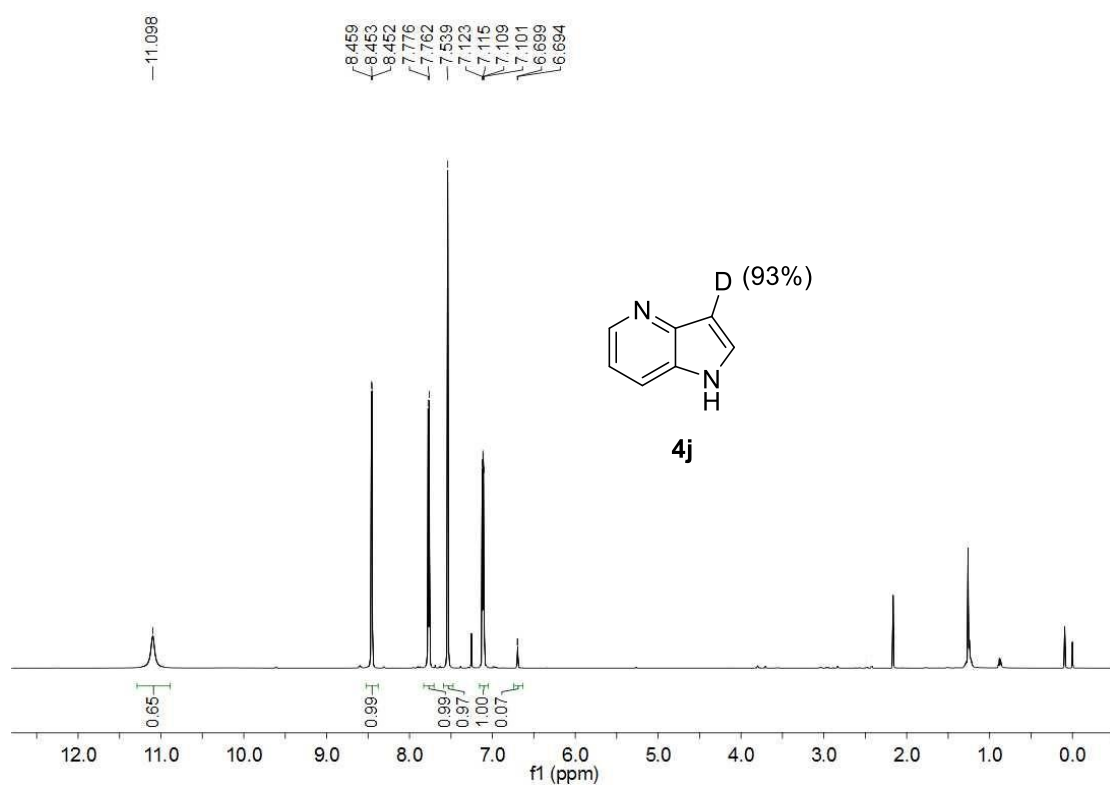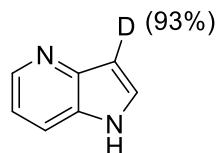

4j



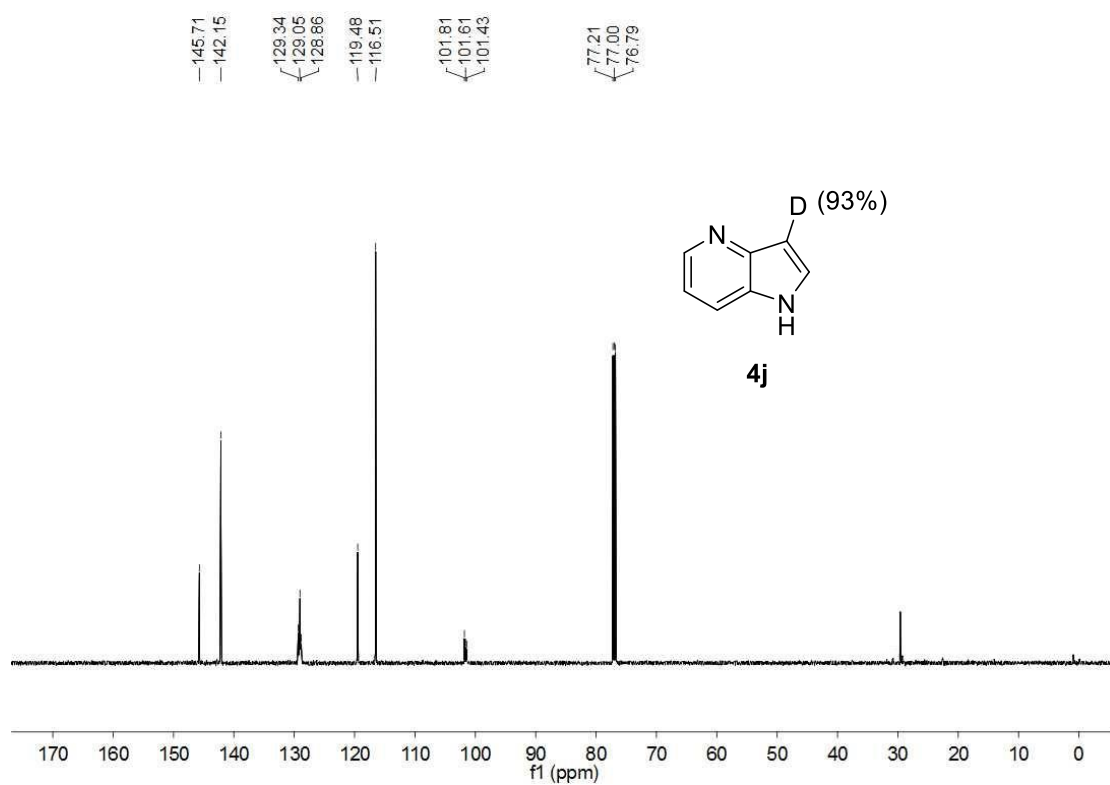

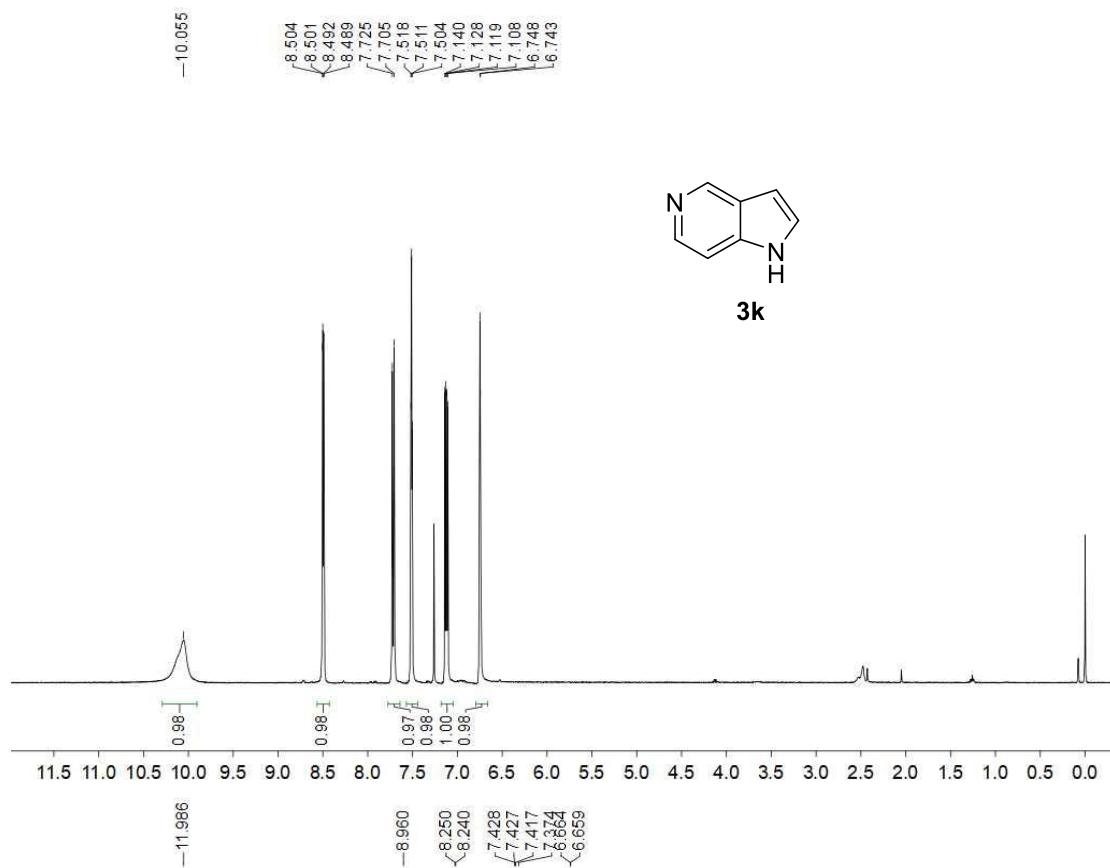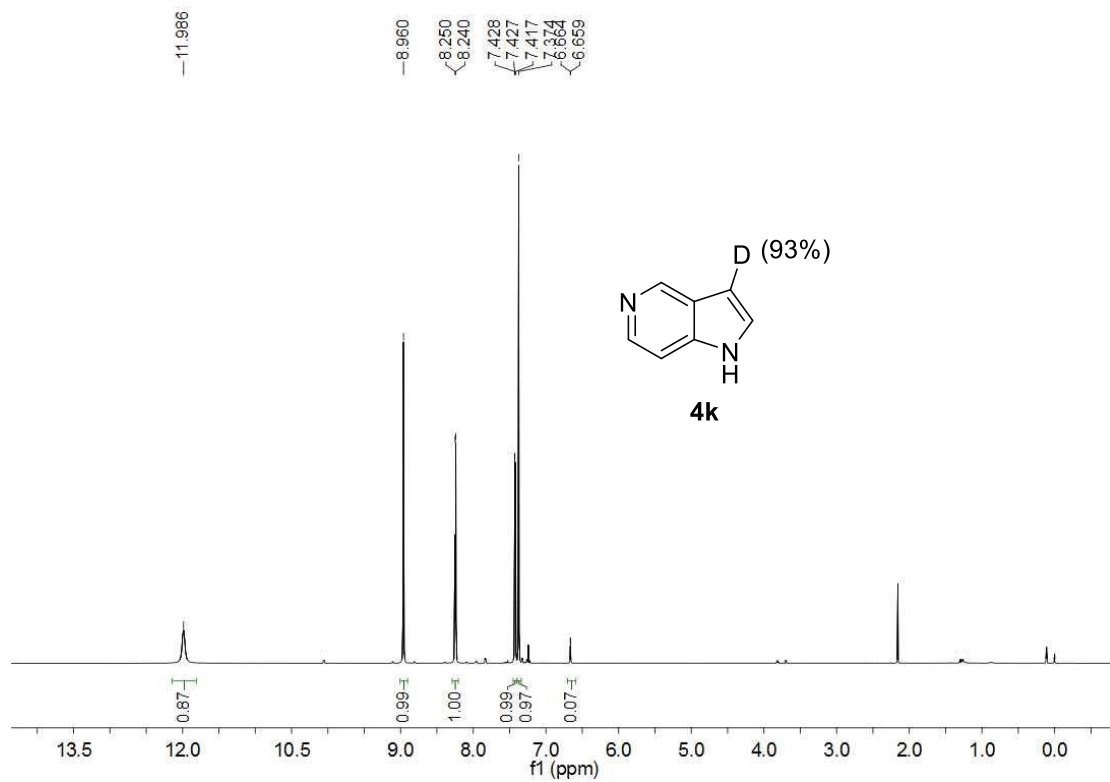

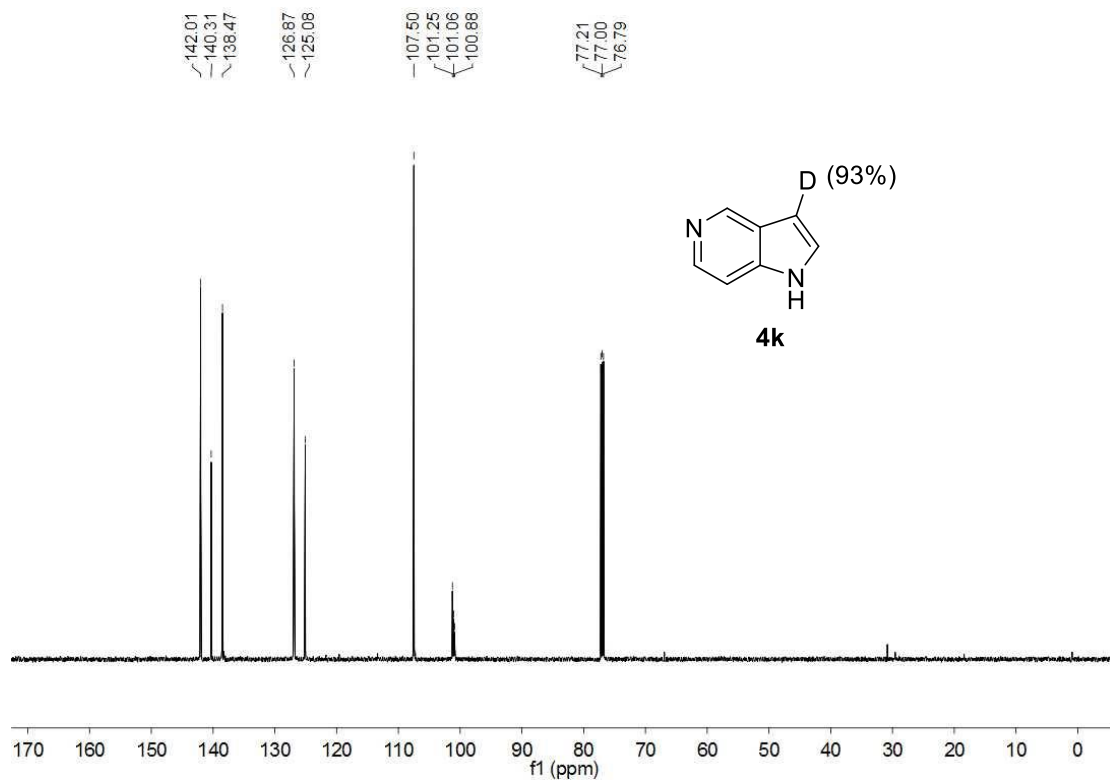

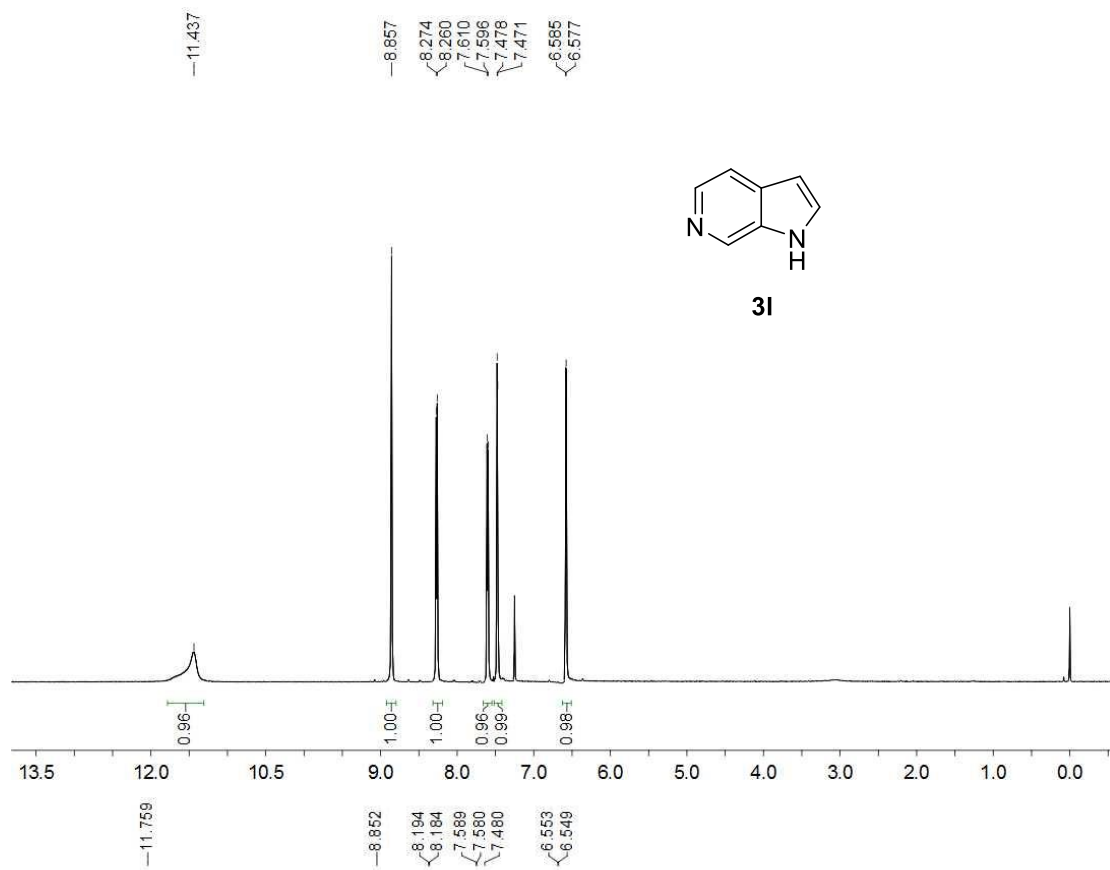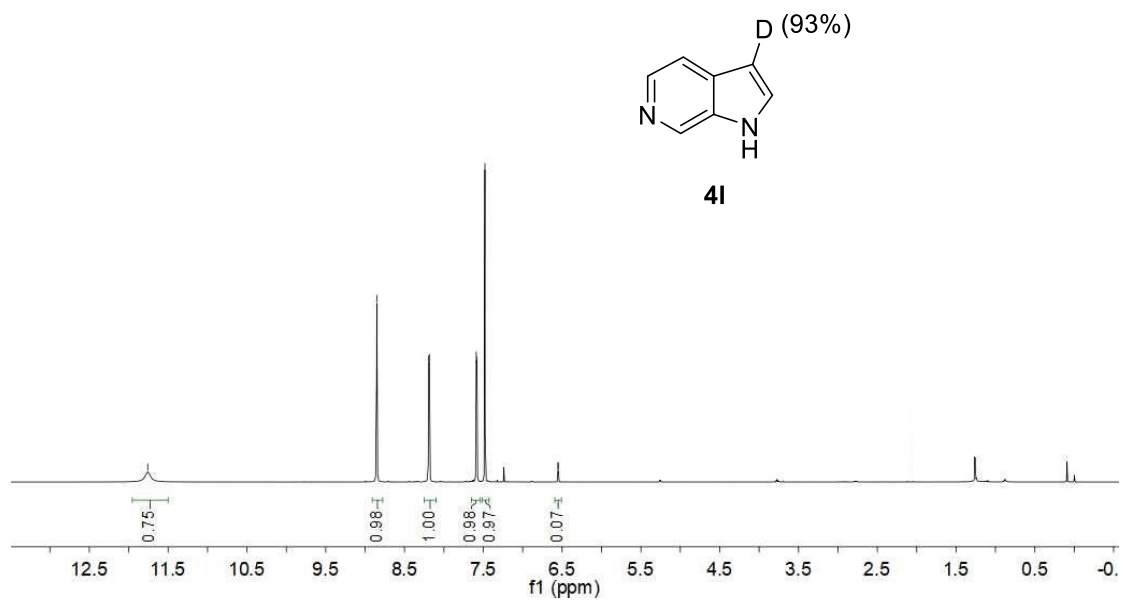

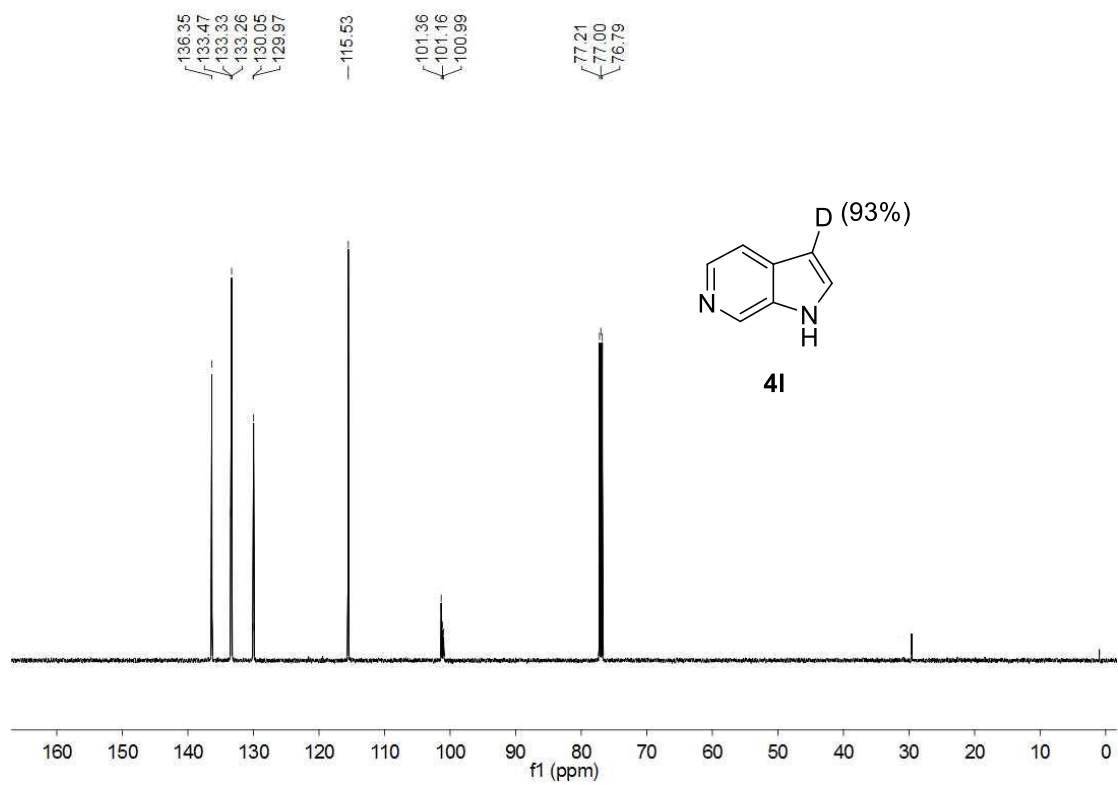

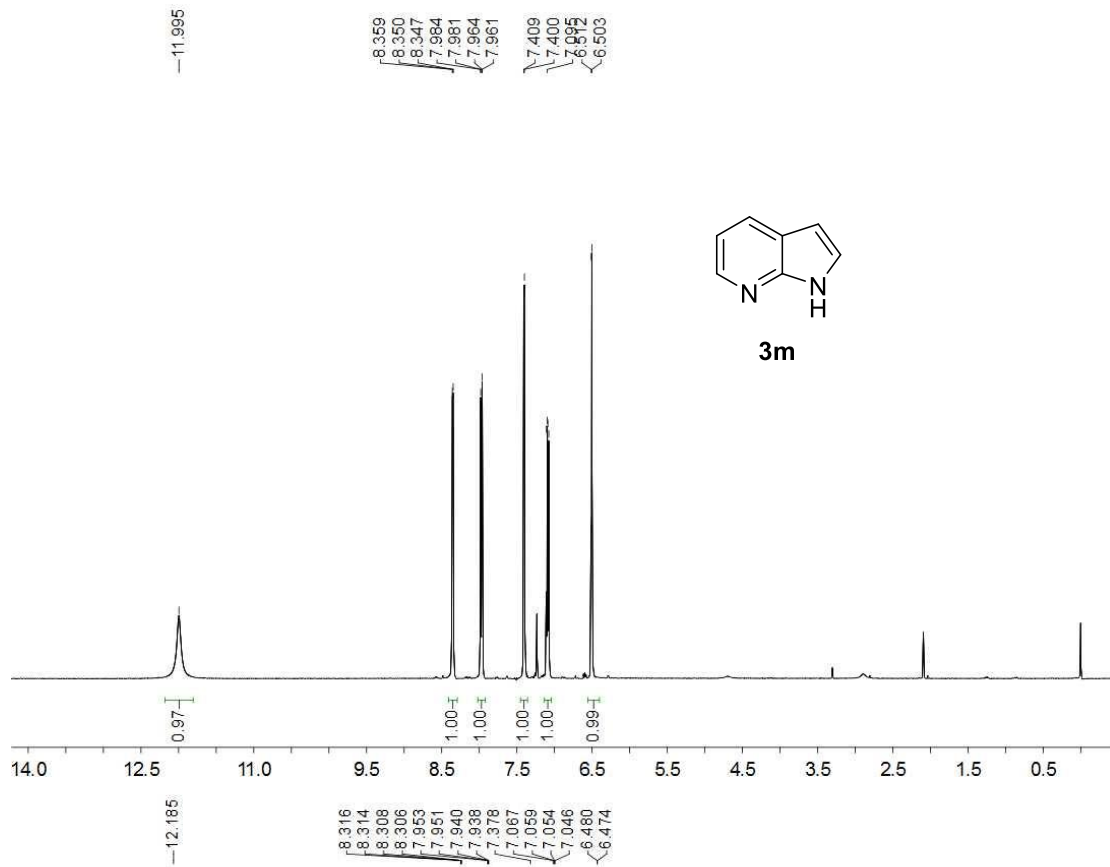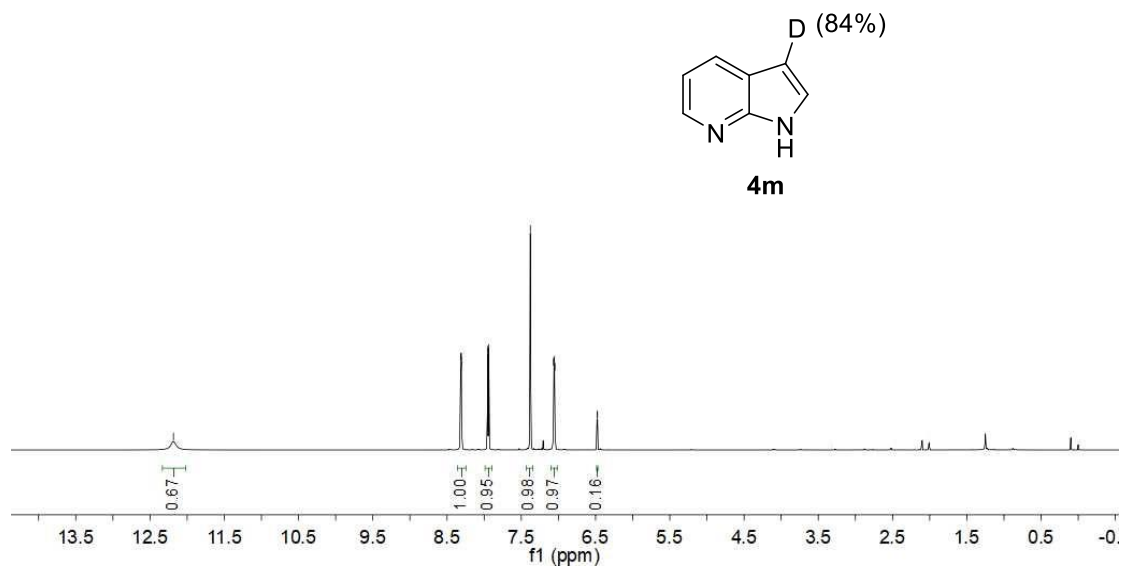

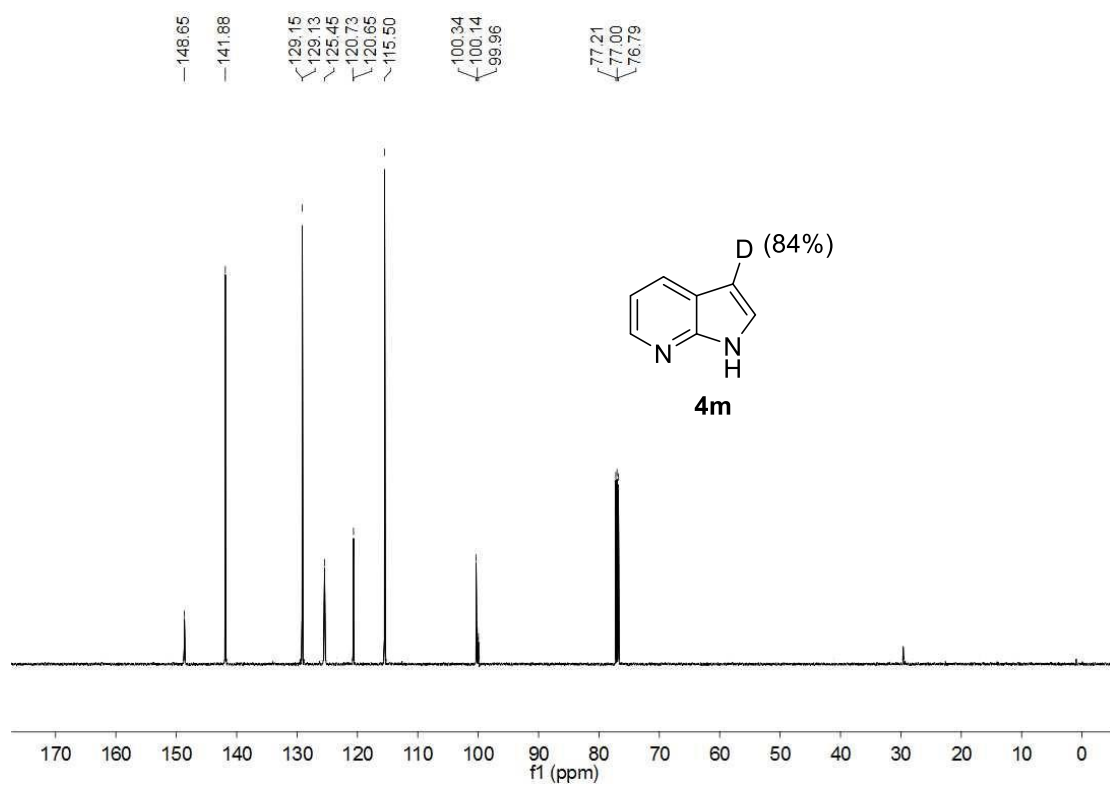

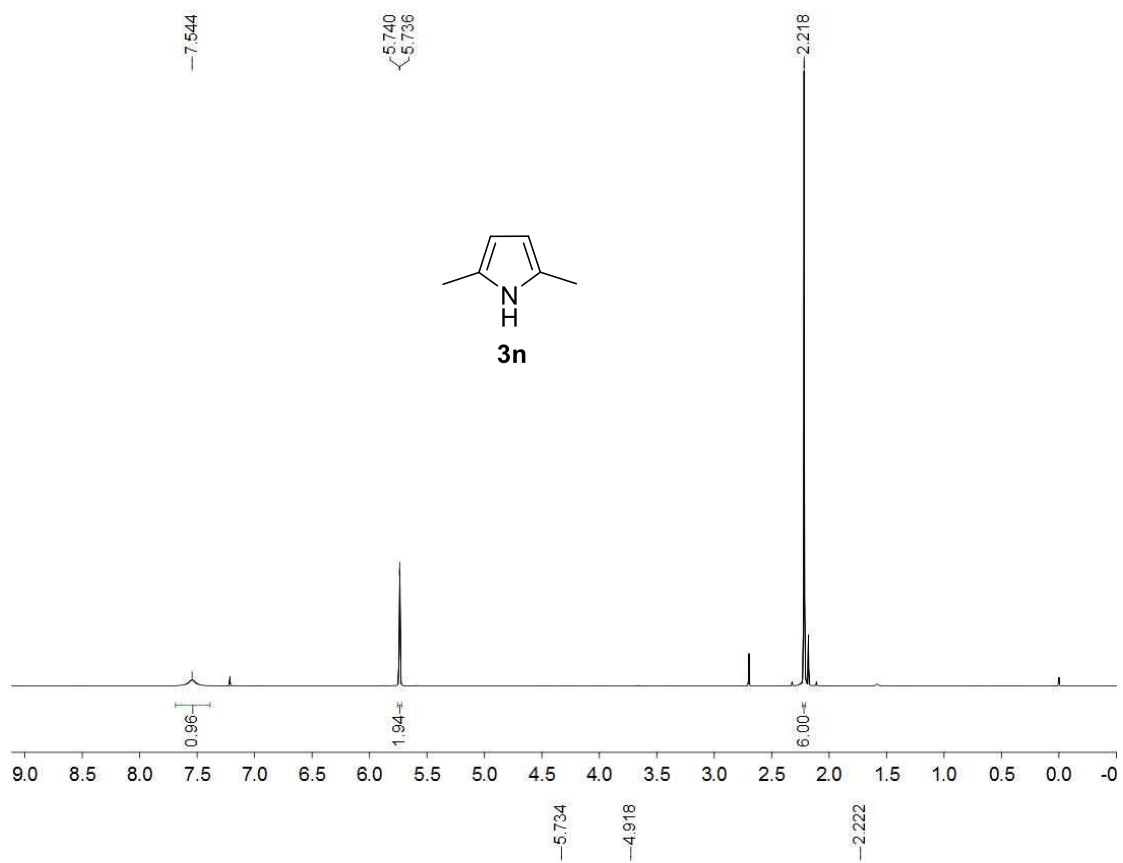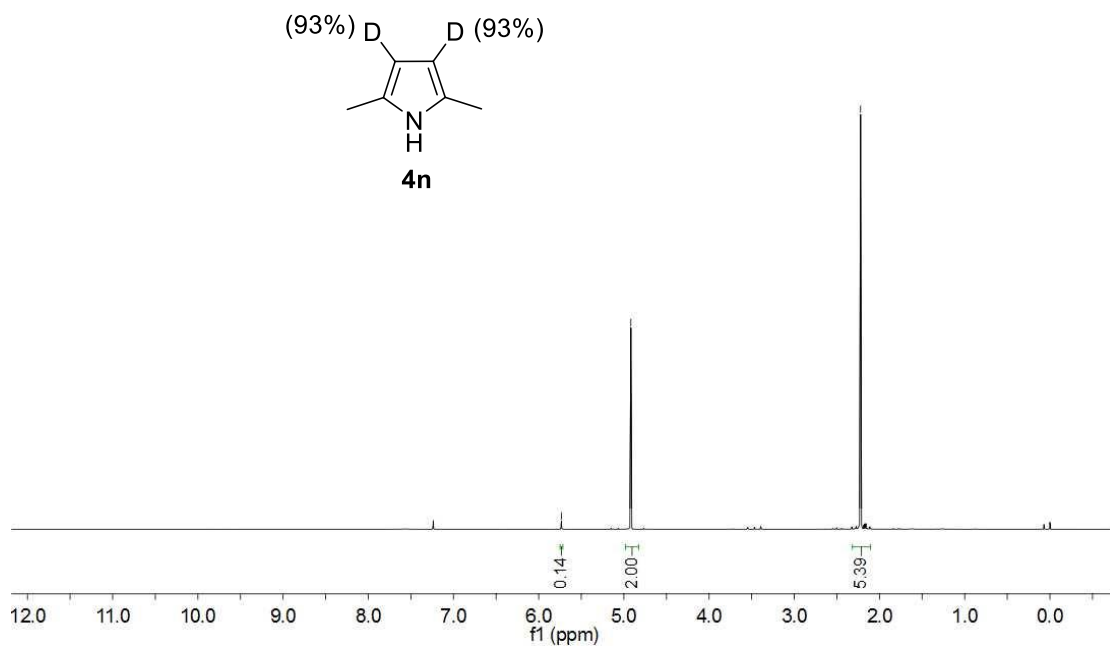



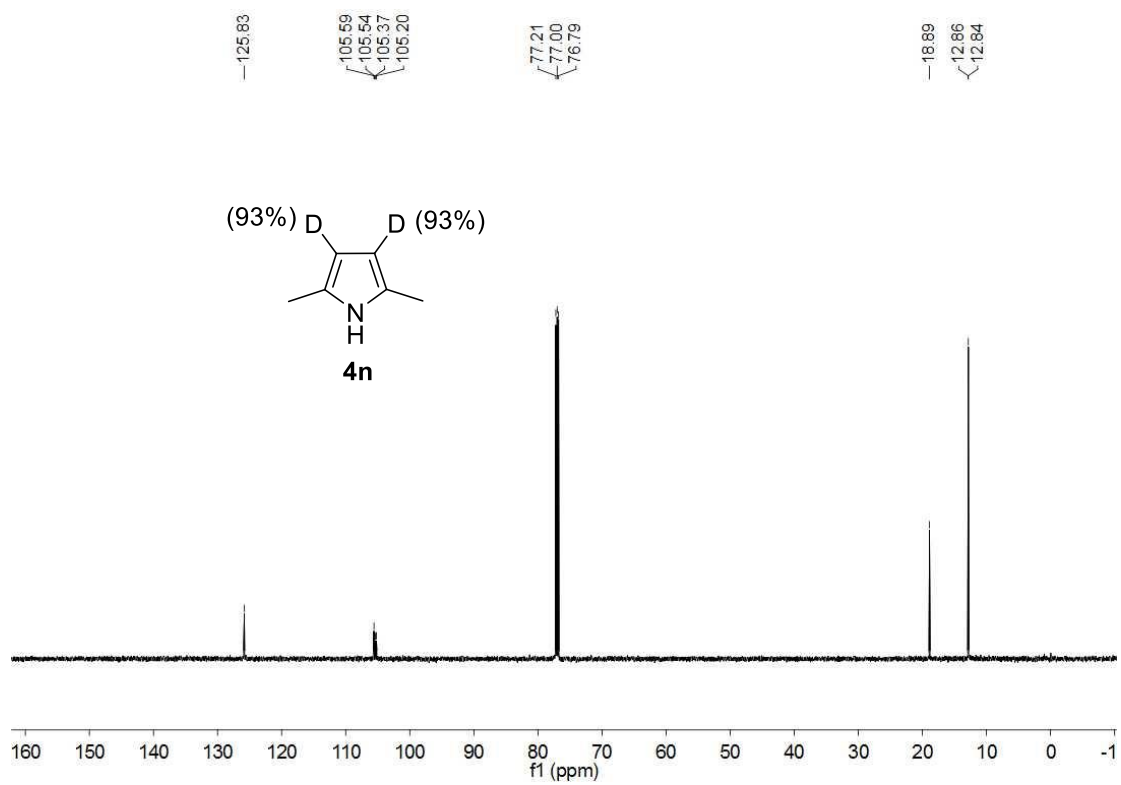

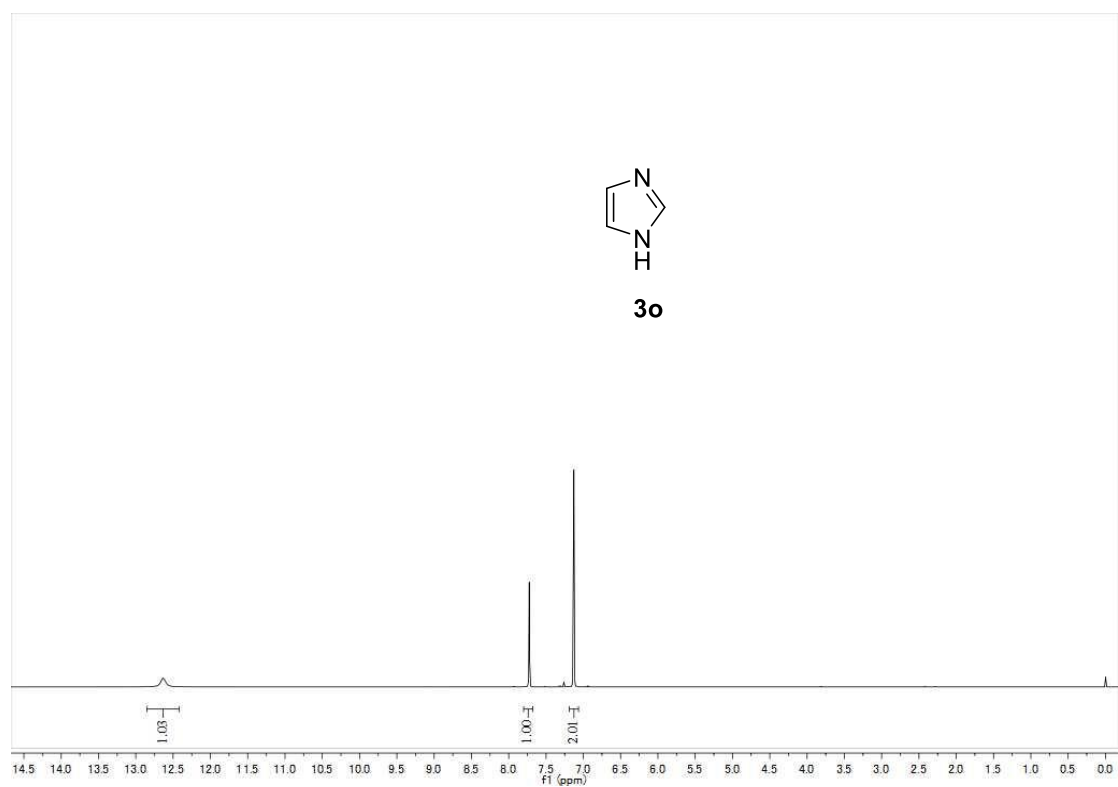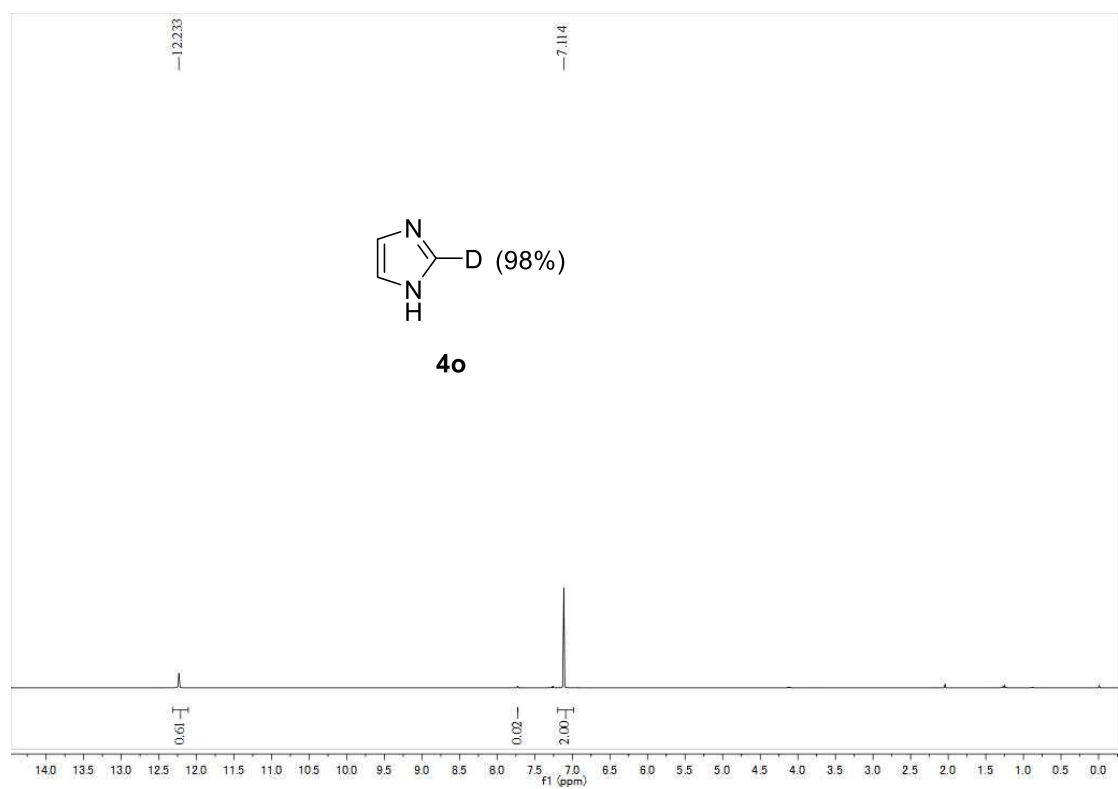

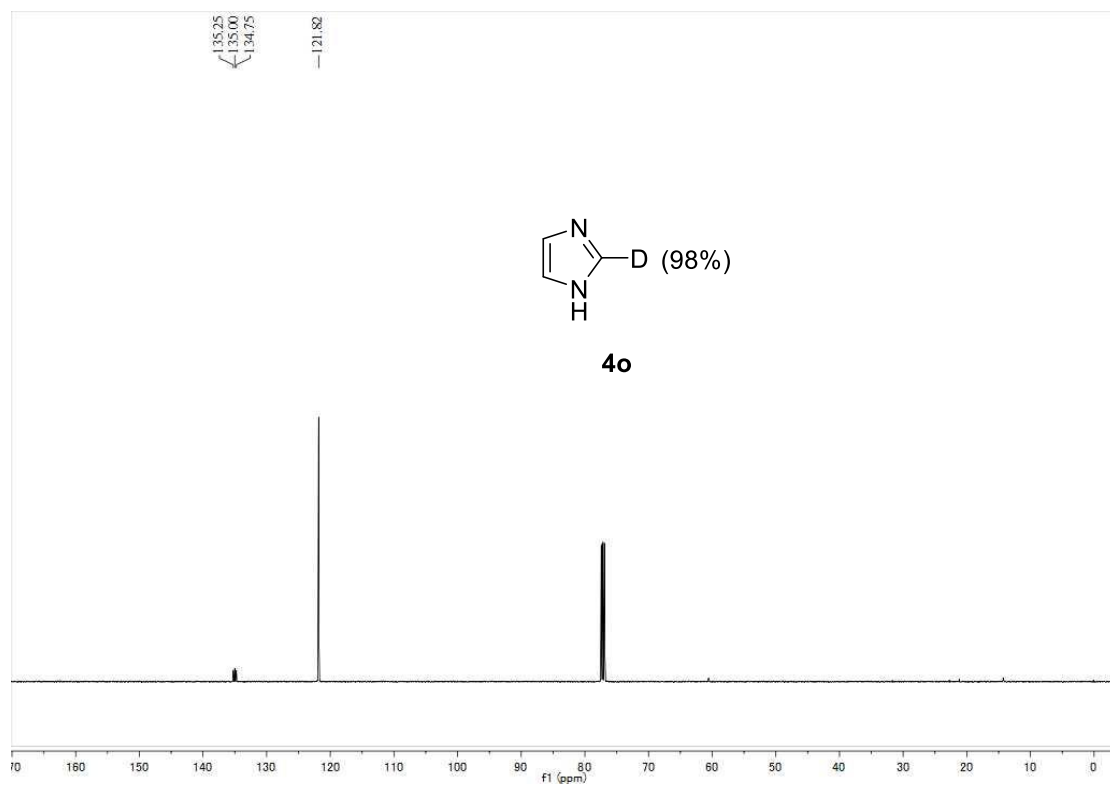

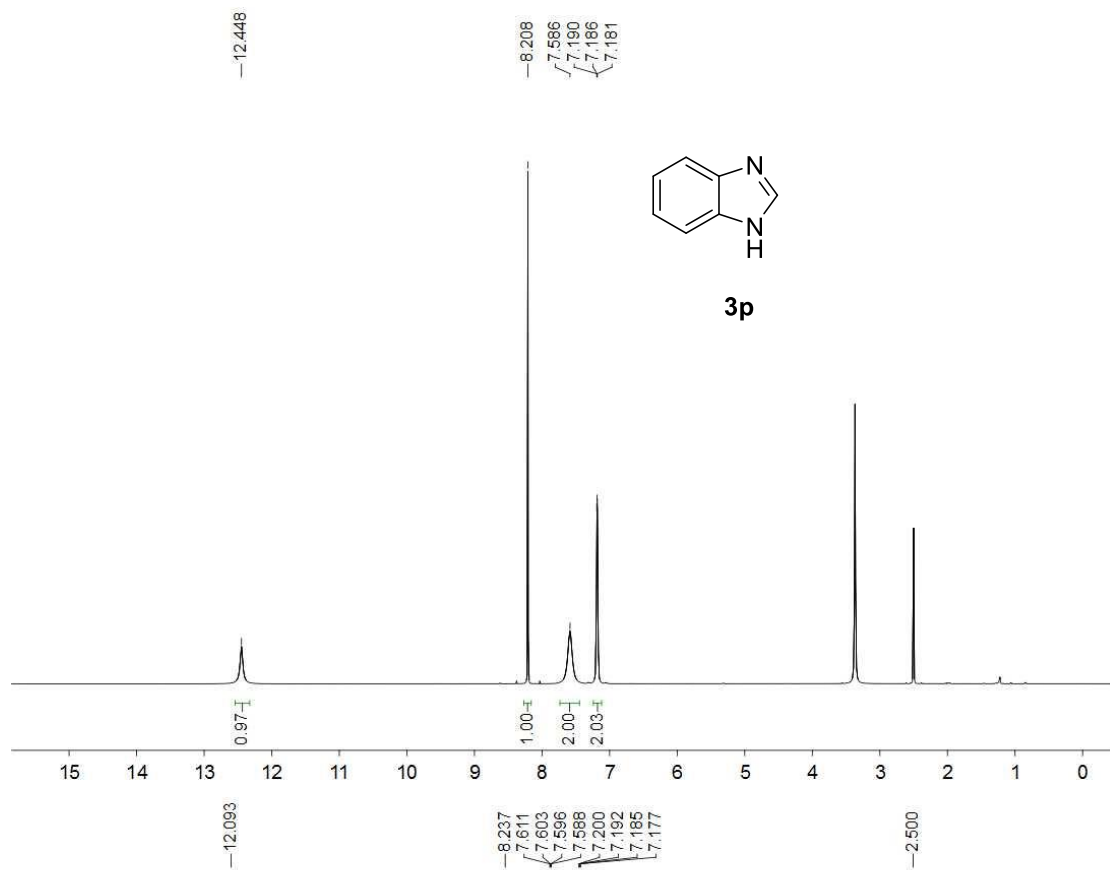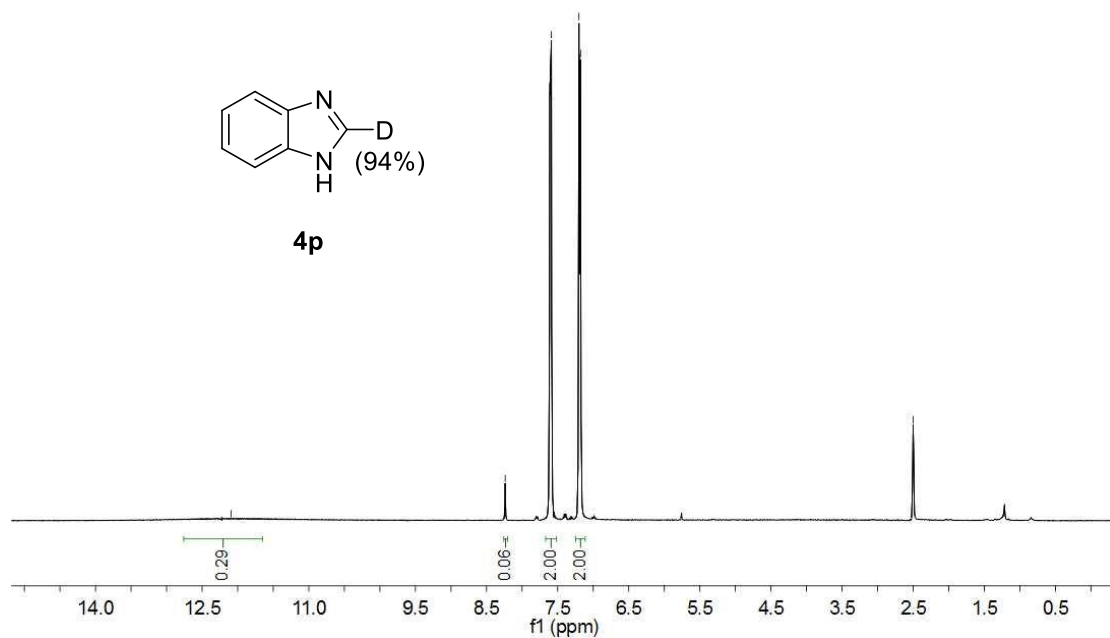

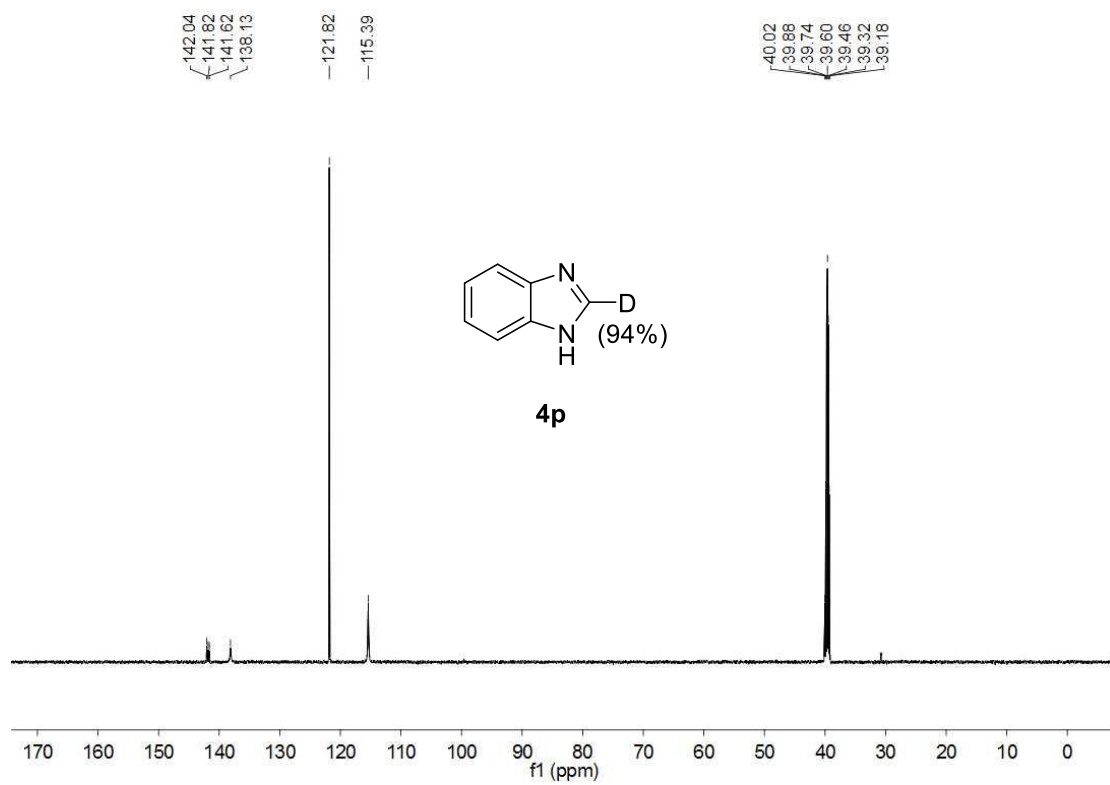

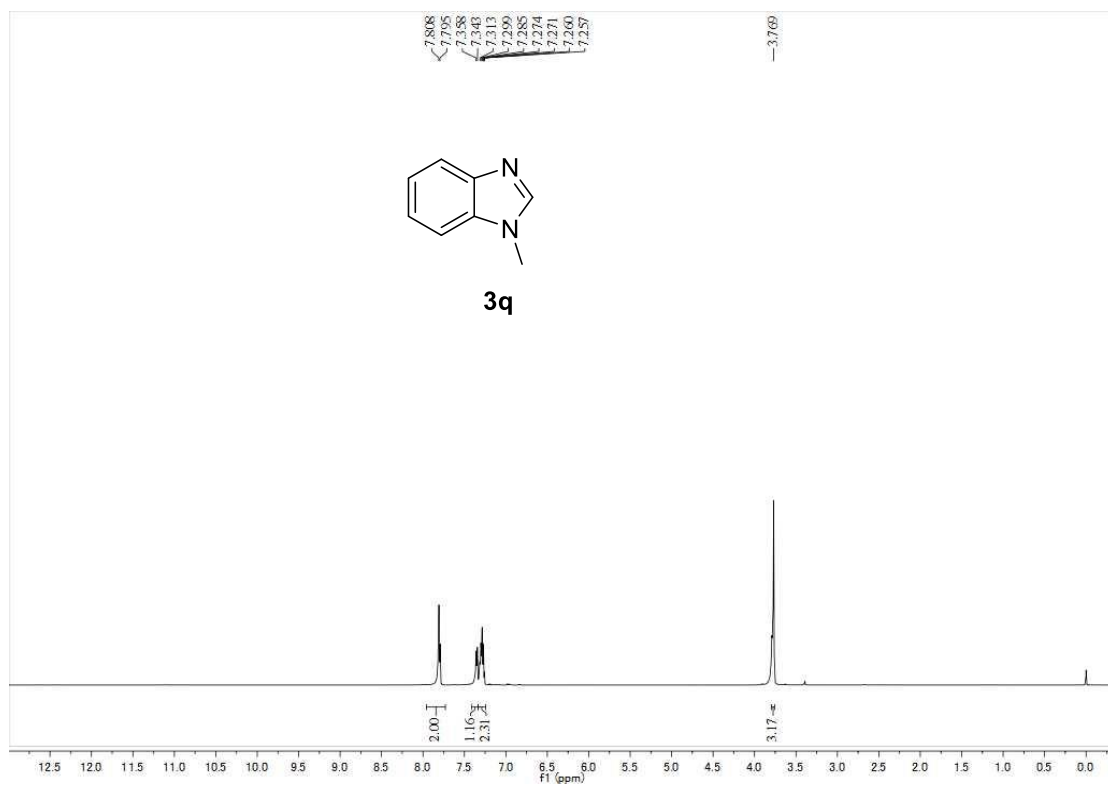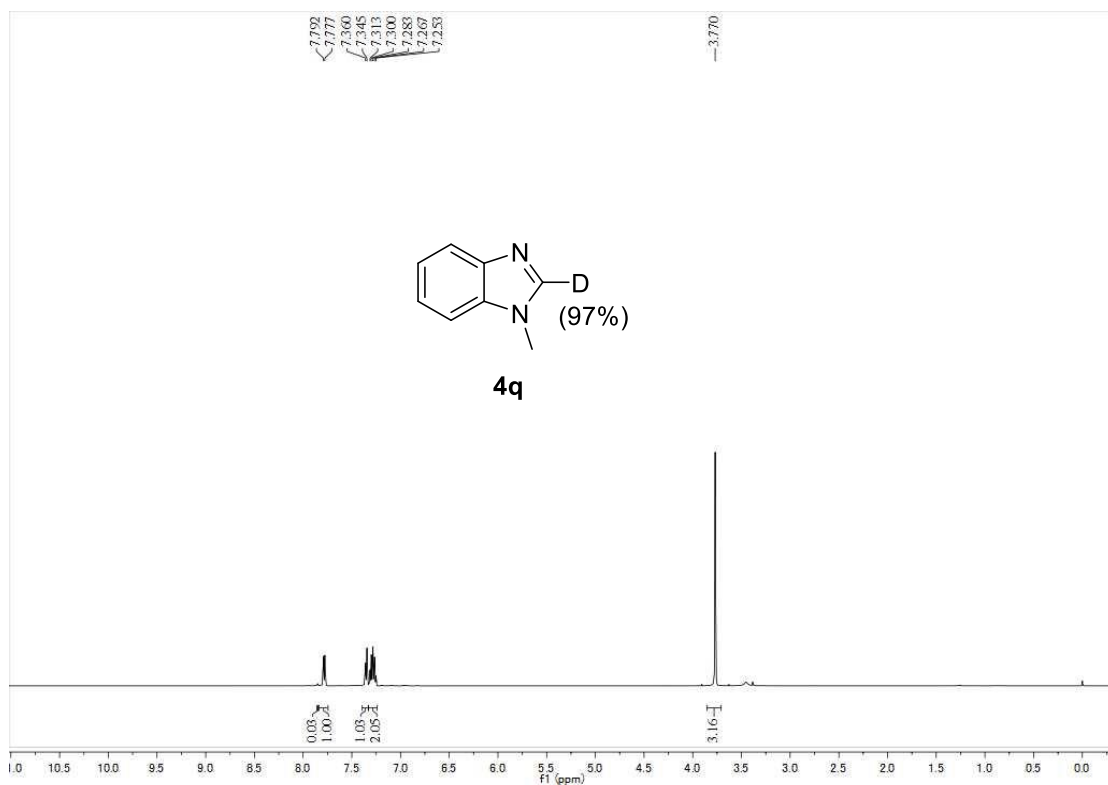

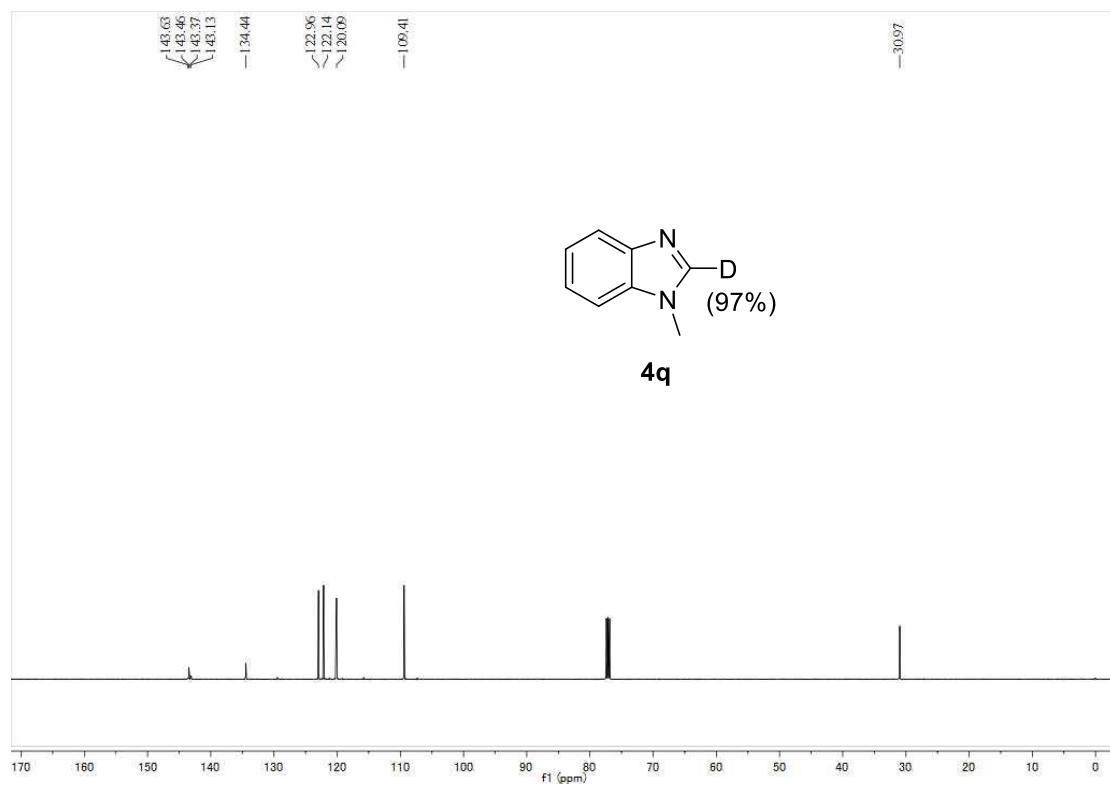

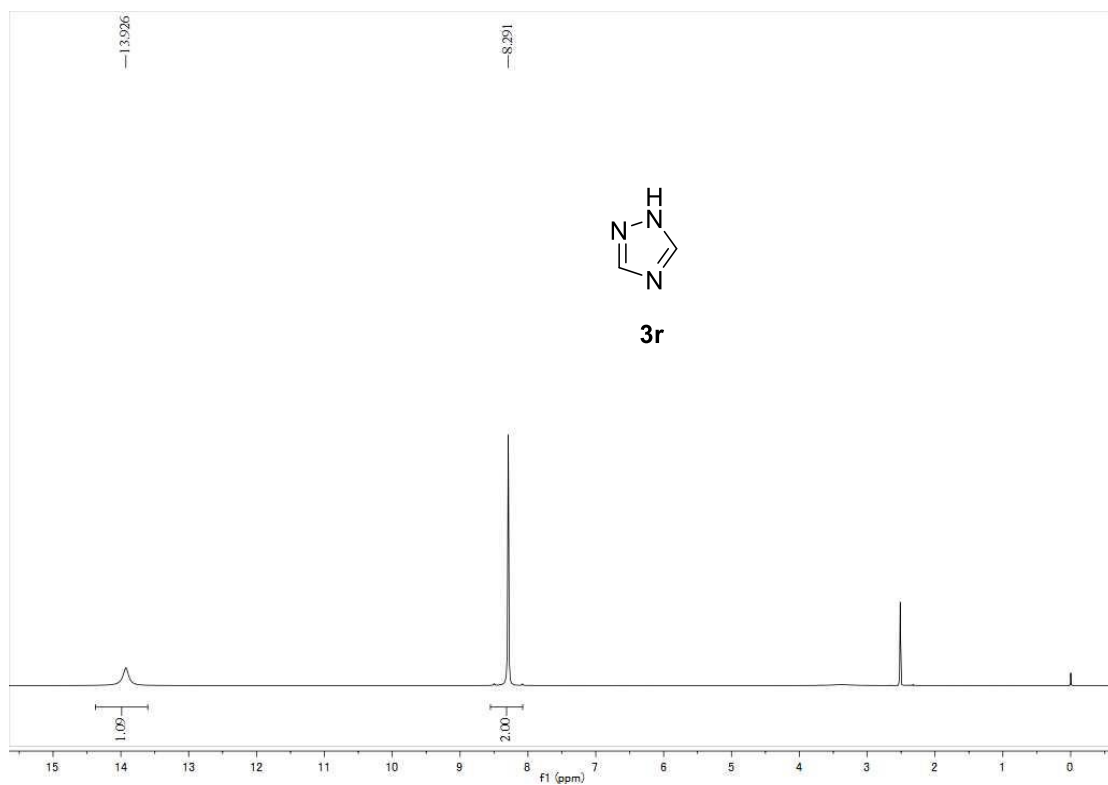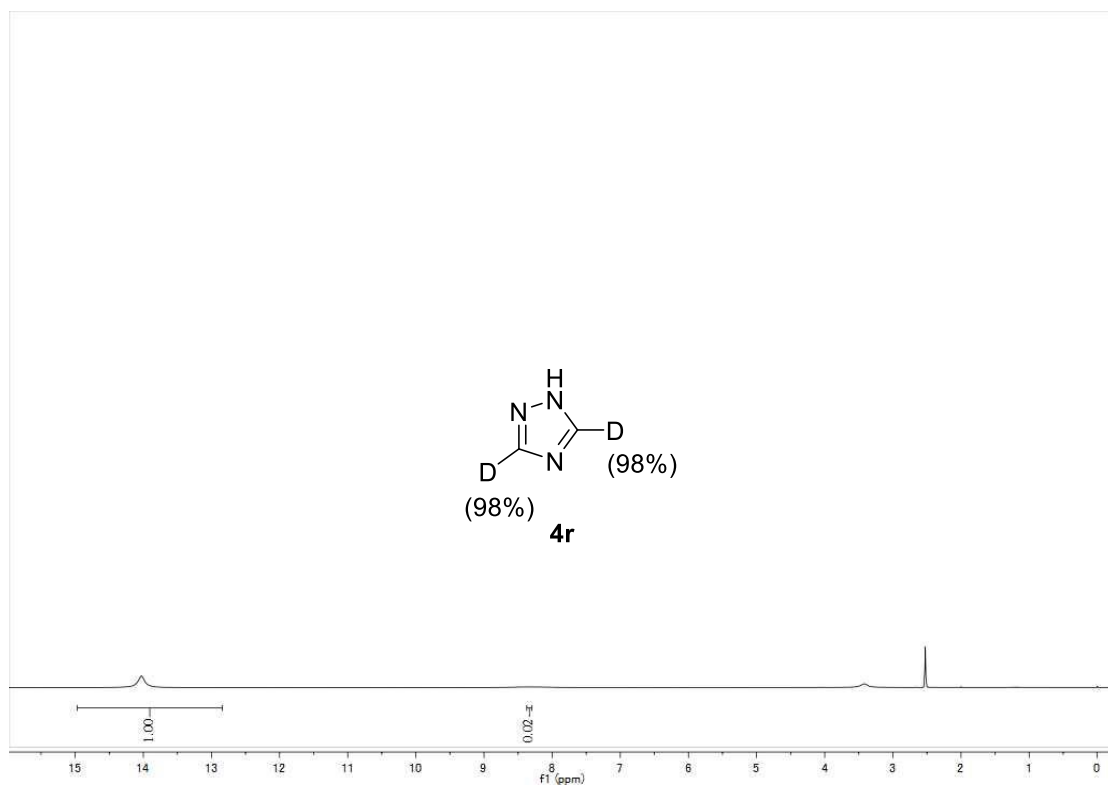



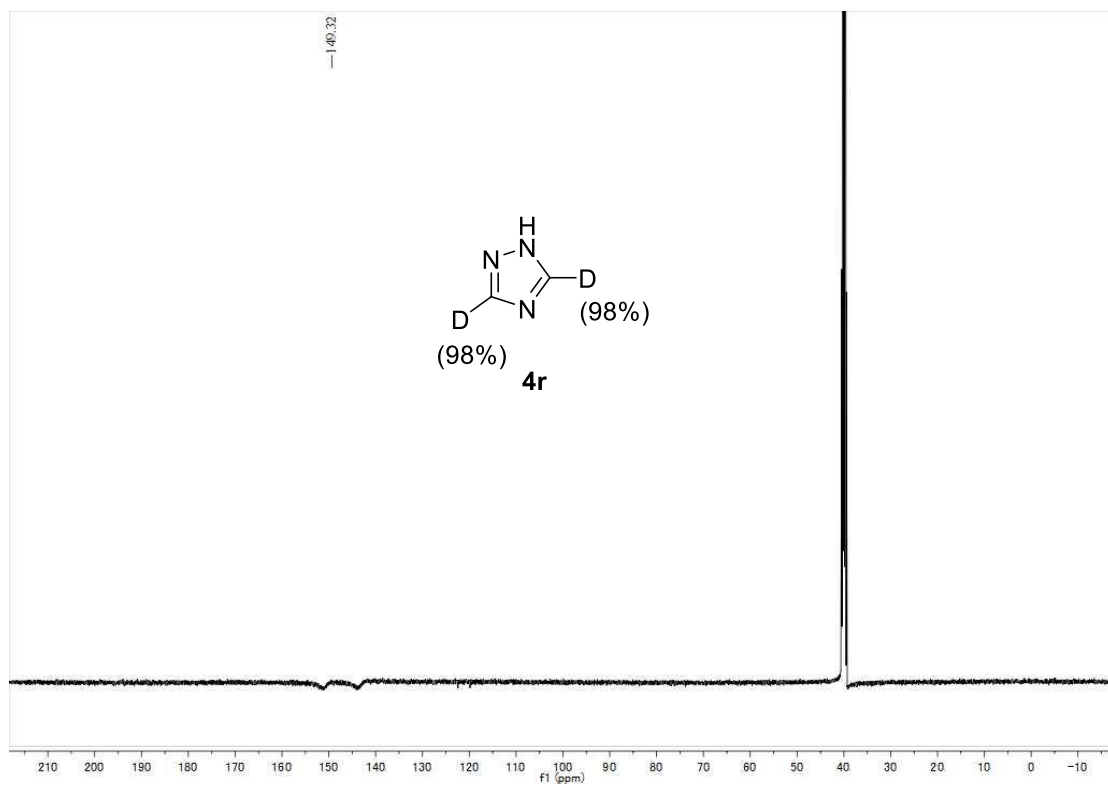

4r

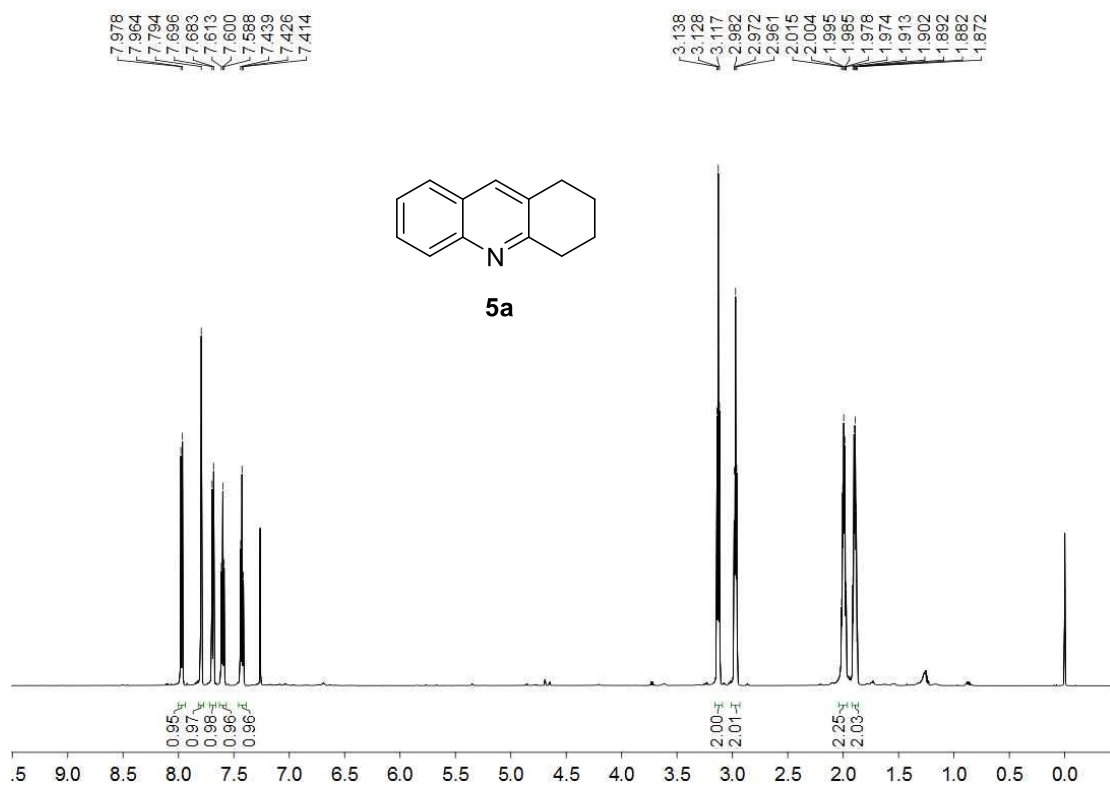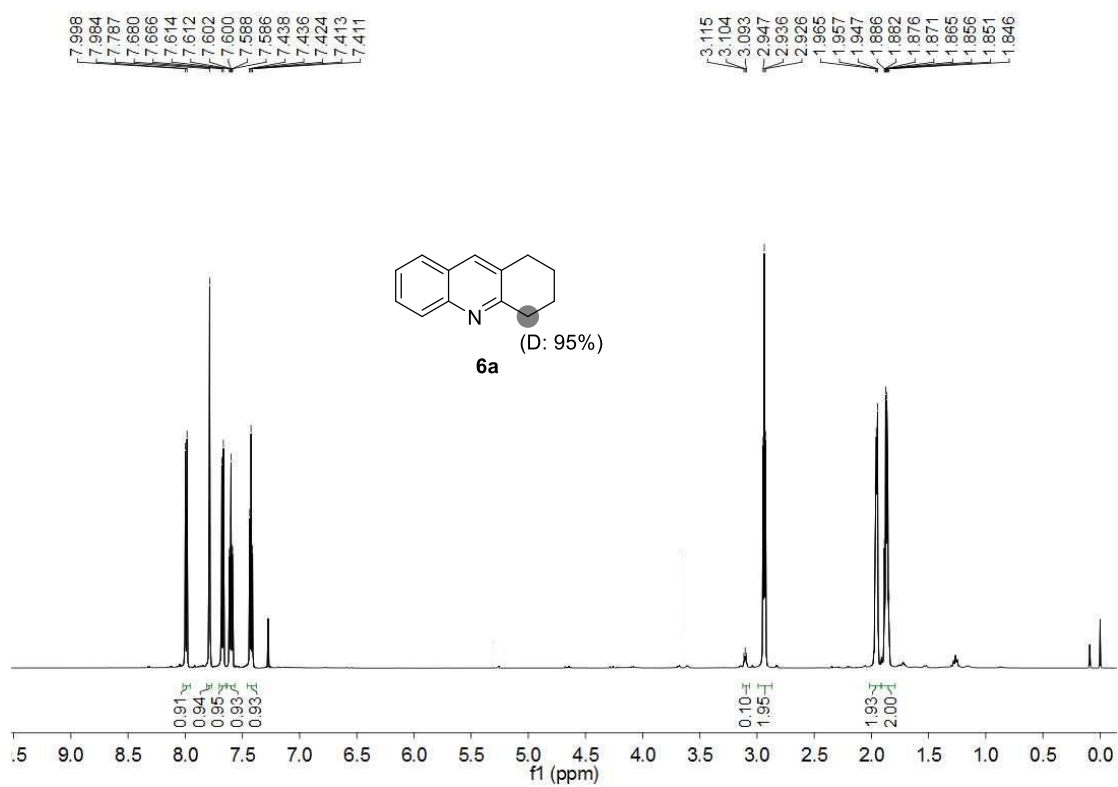

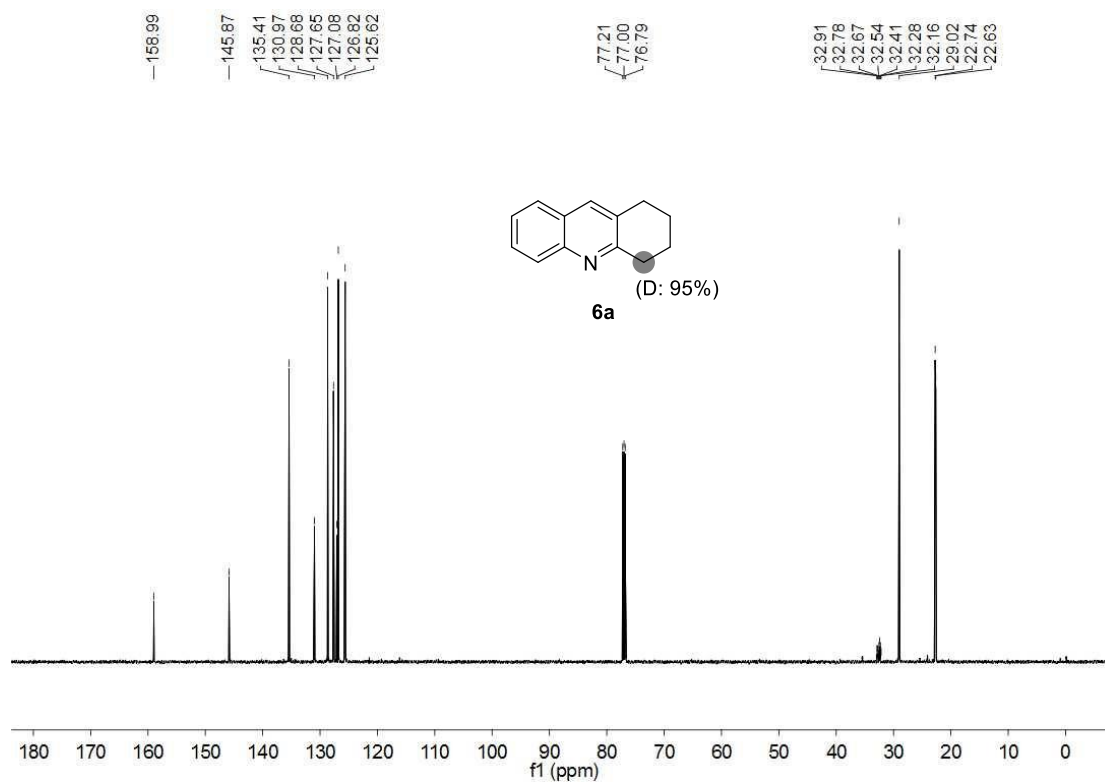

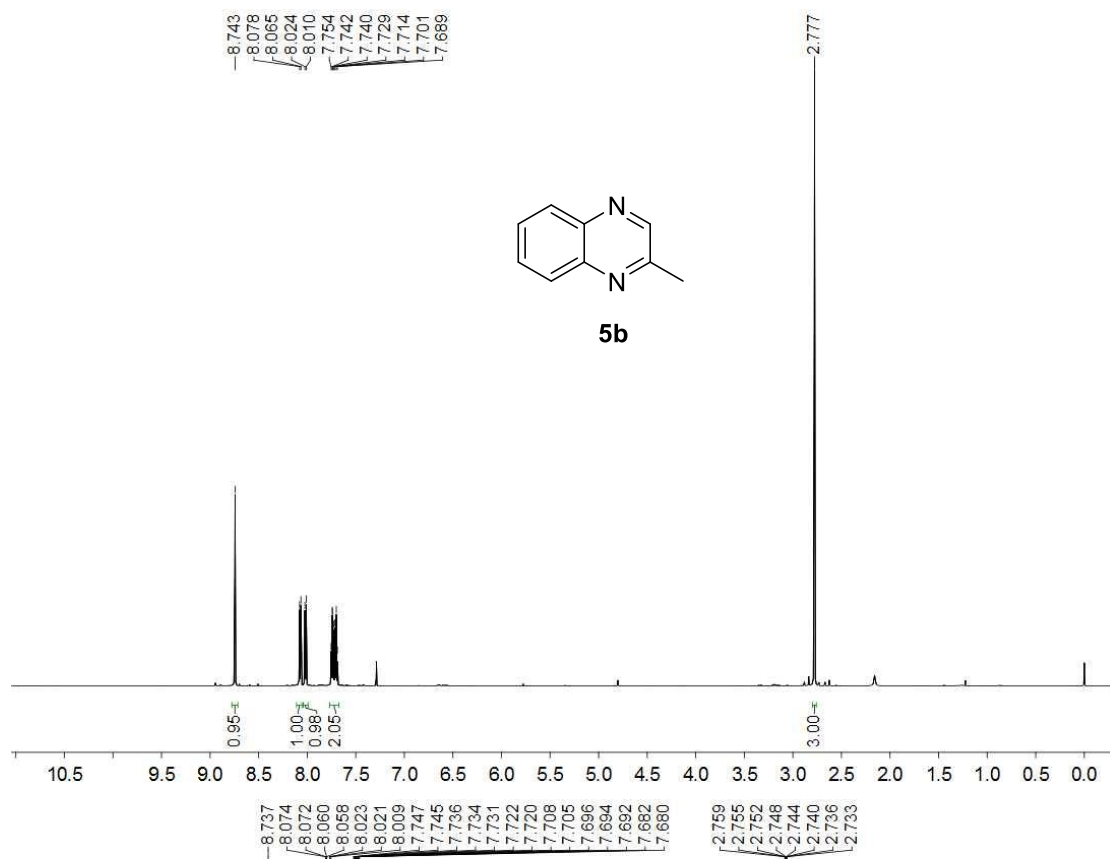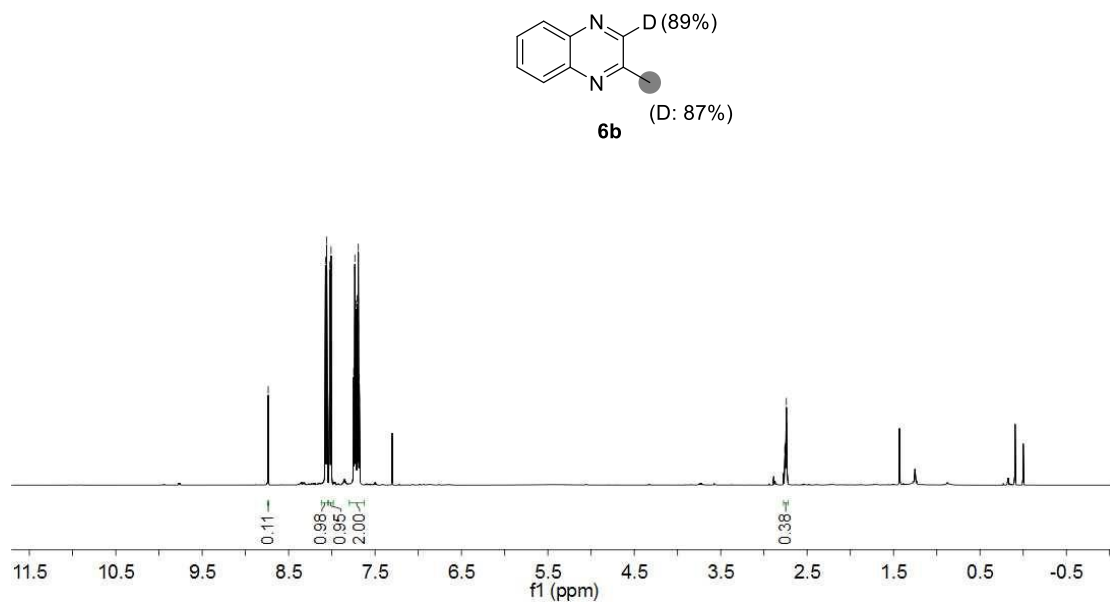

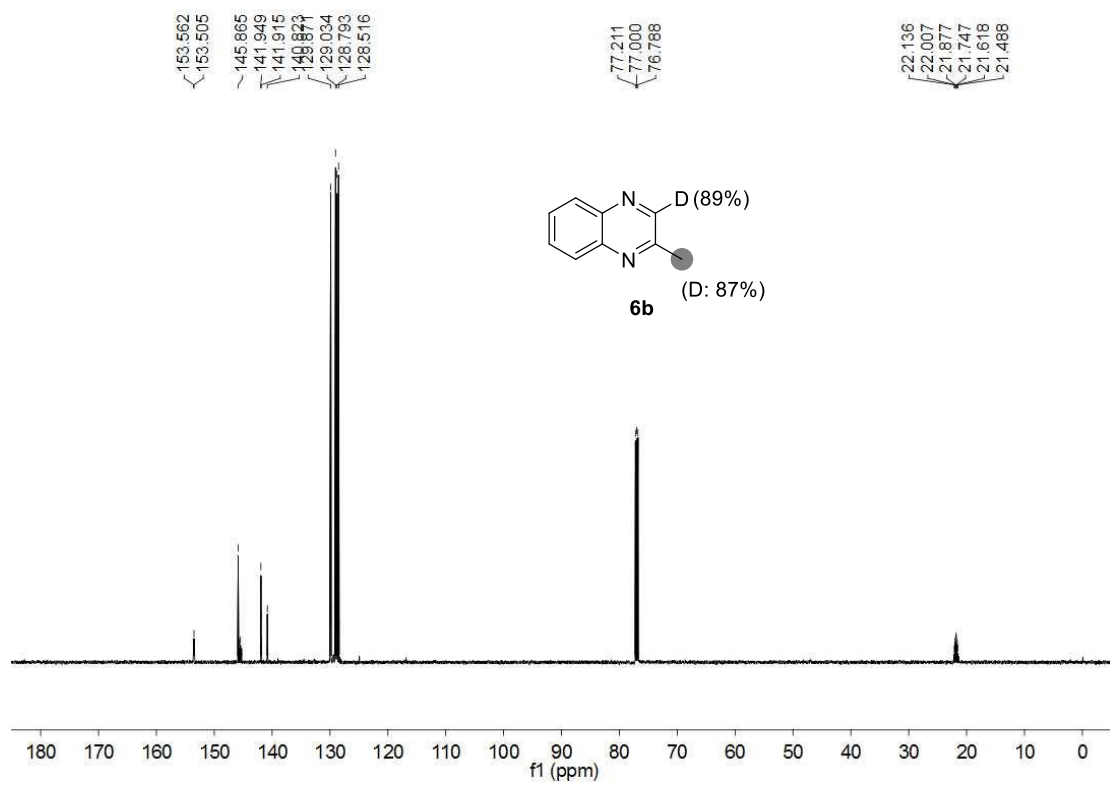

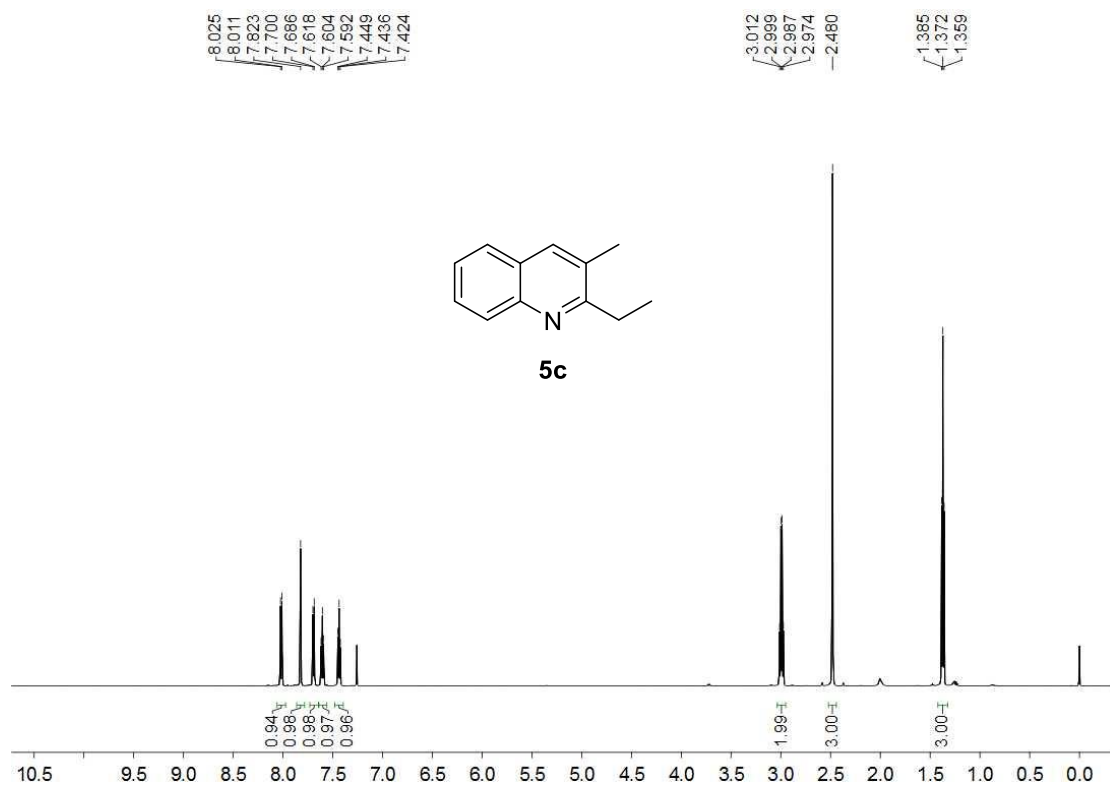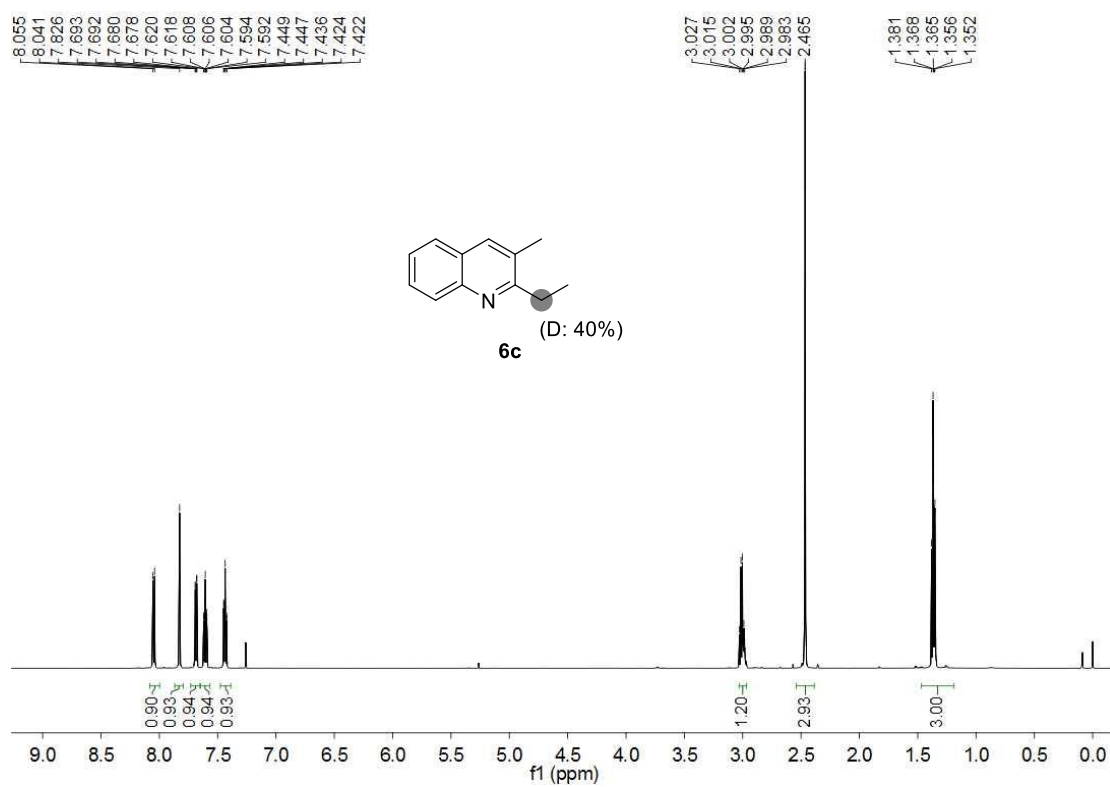

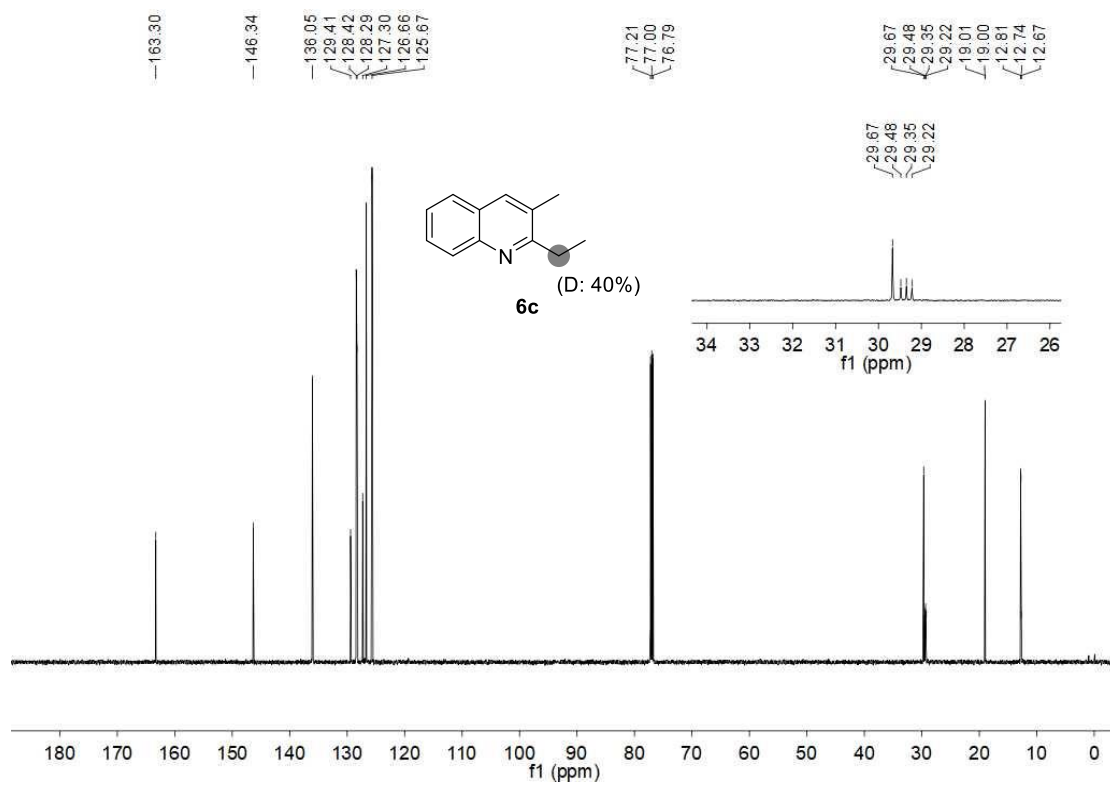

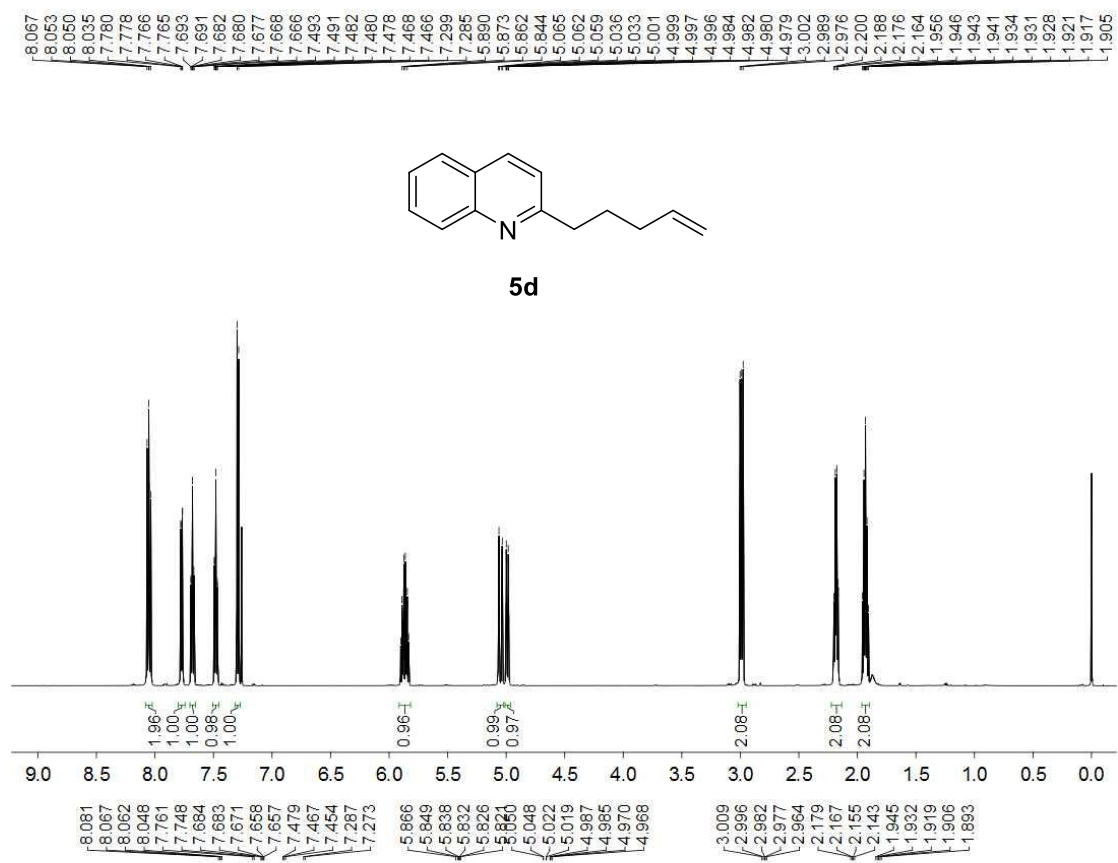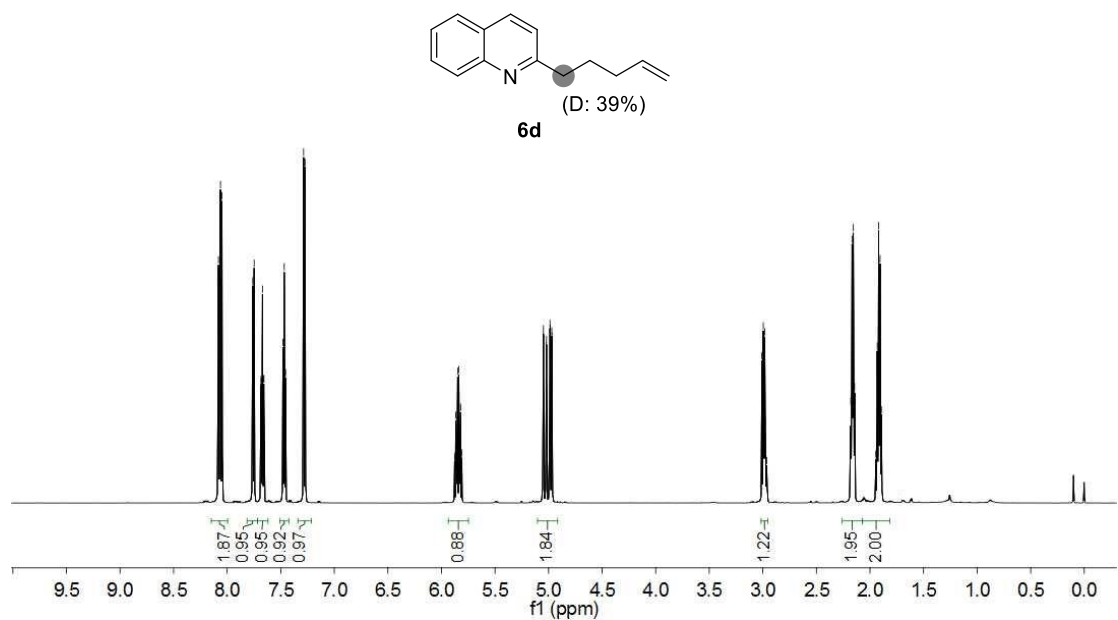



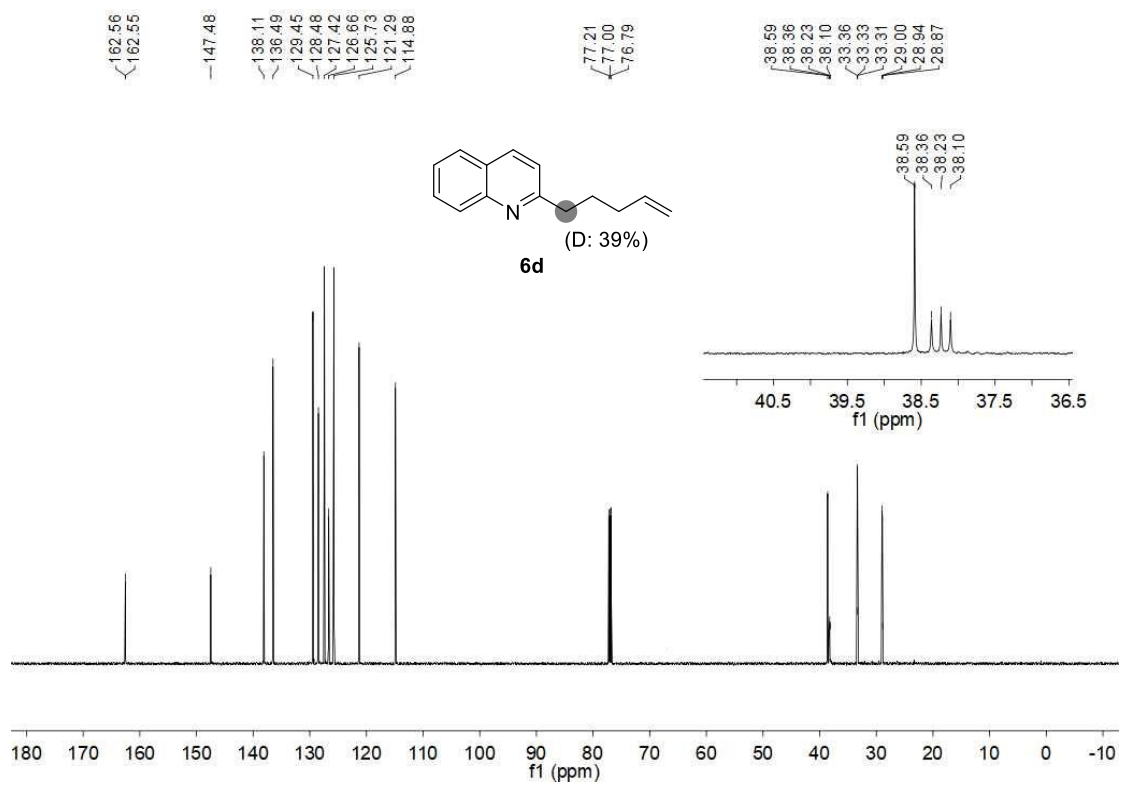

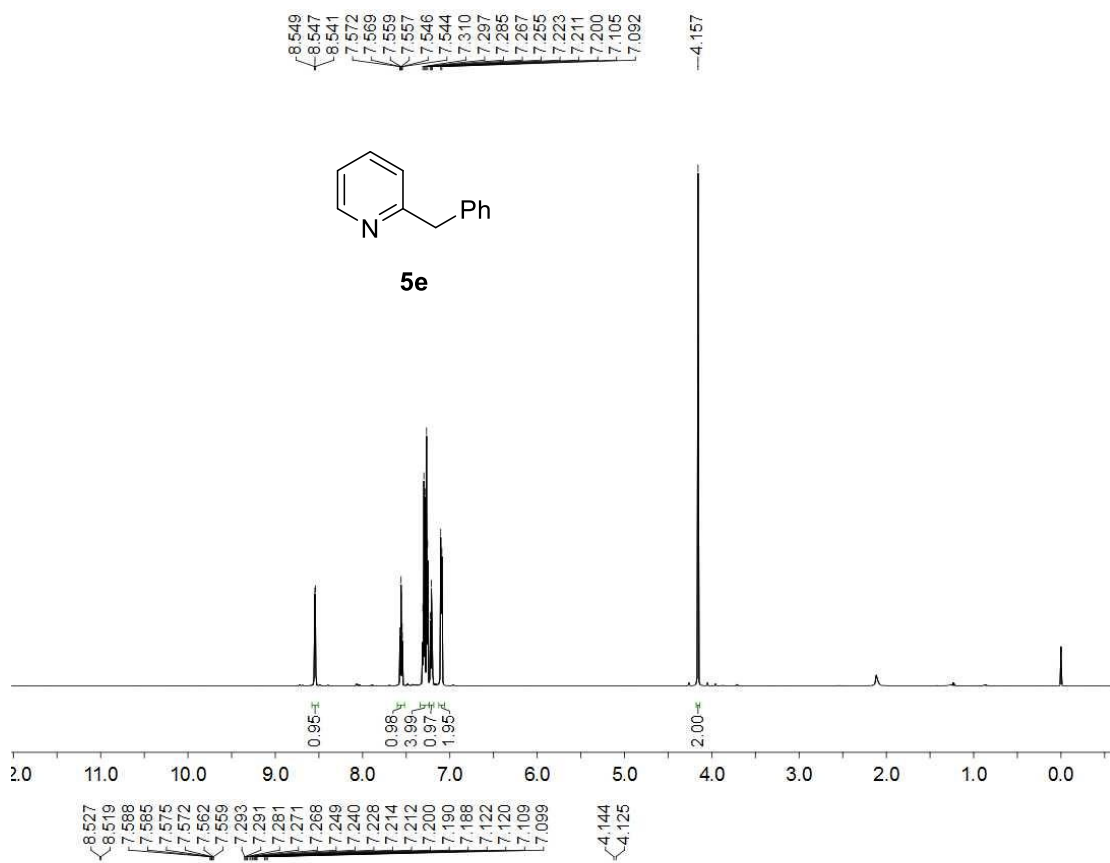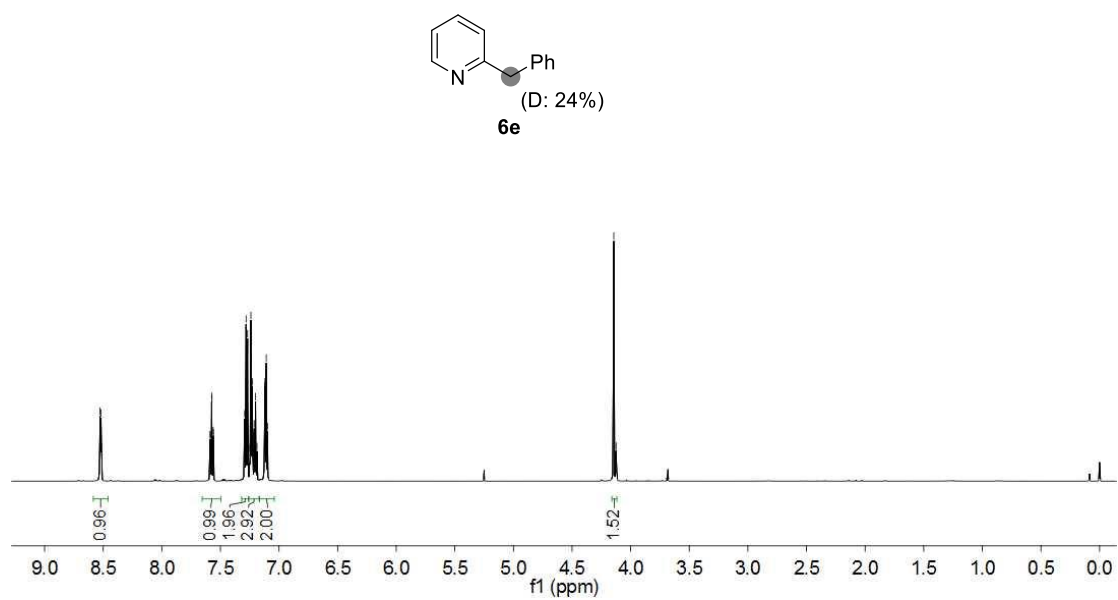

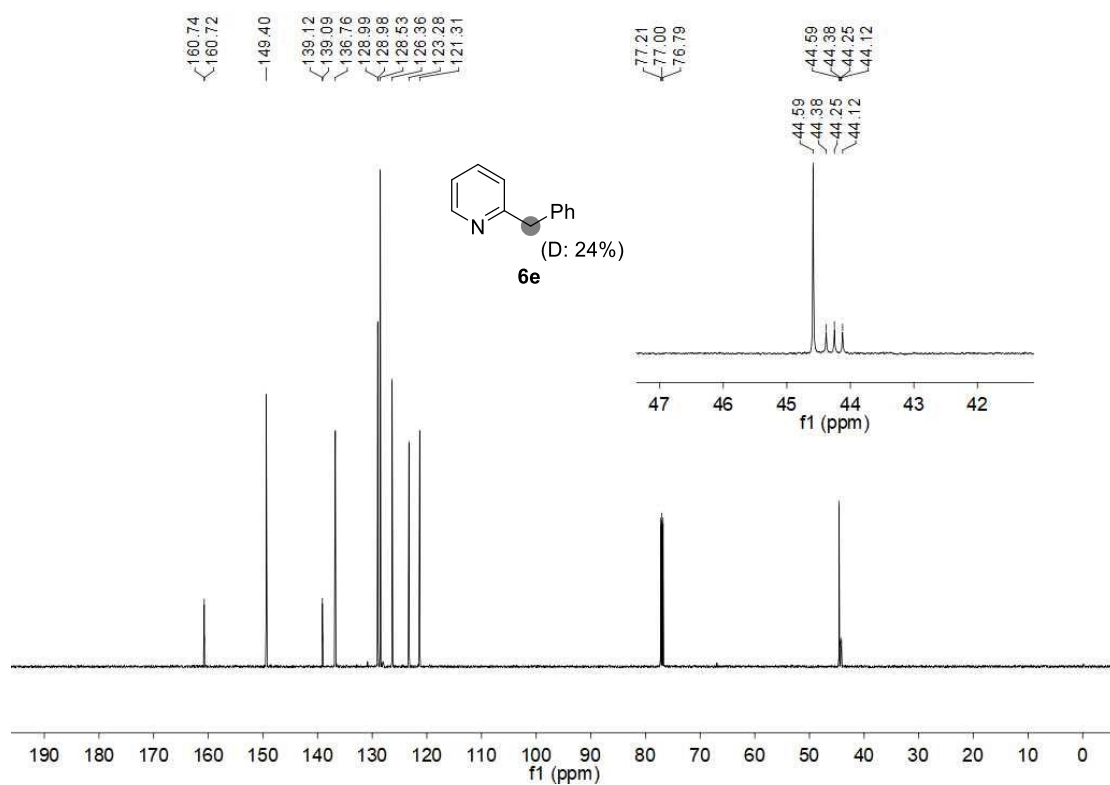

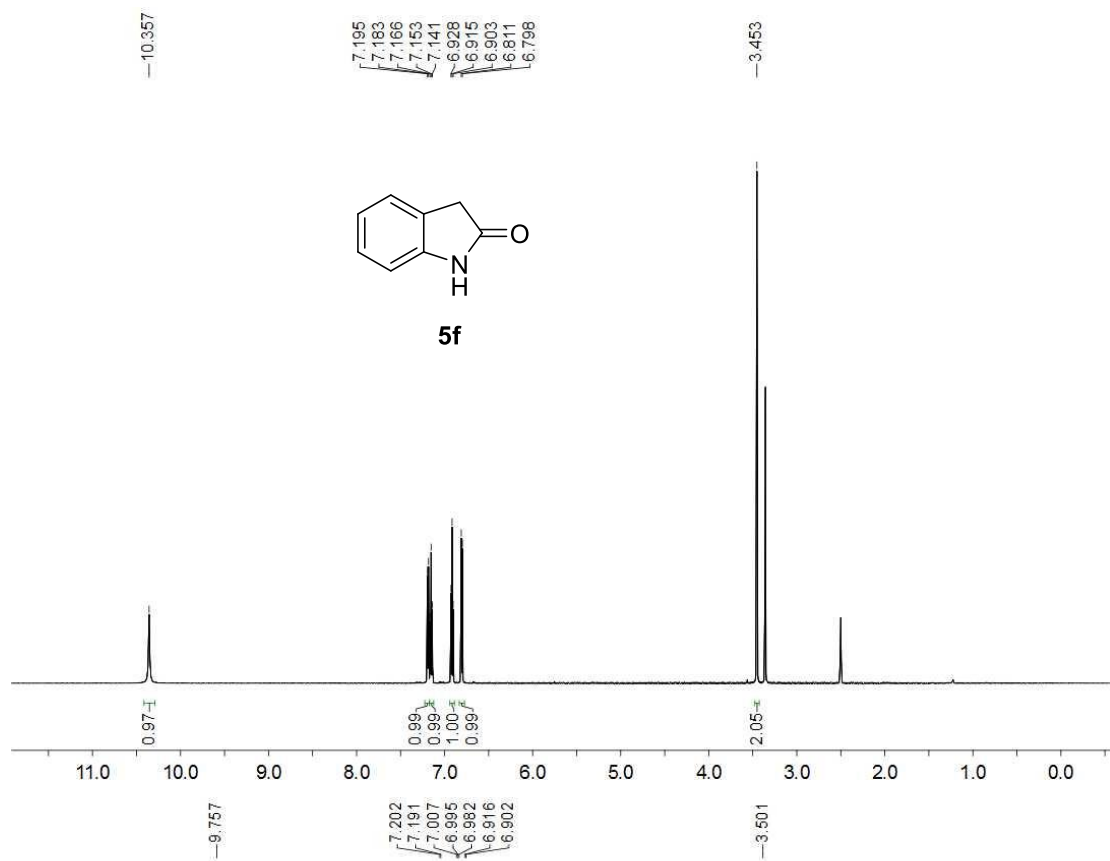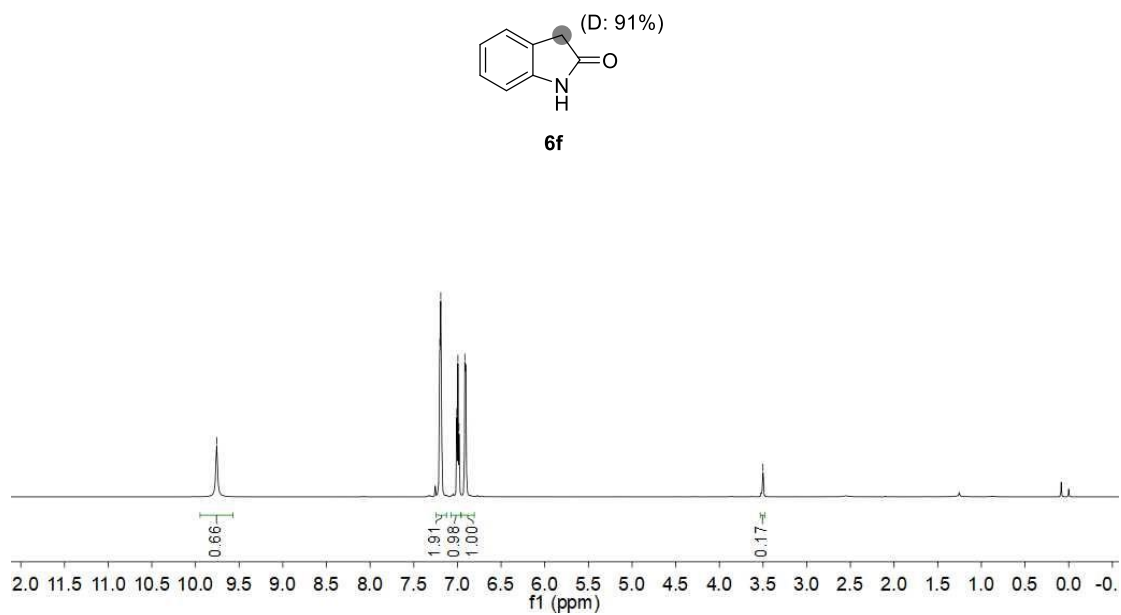

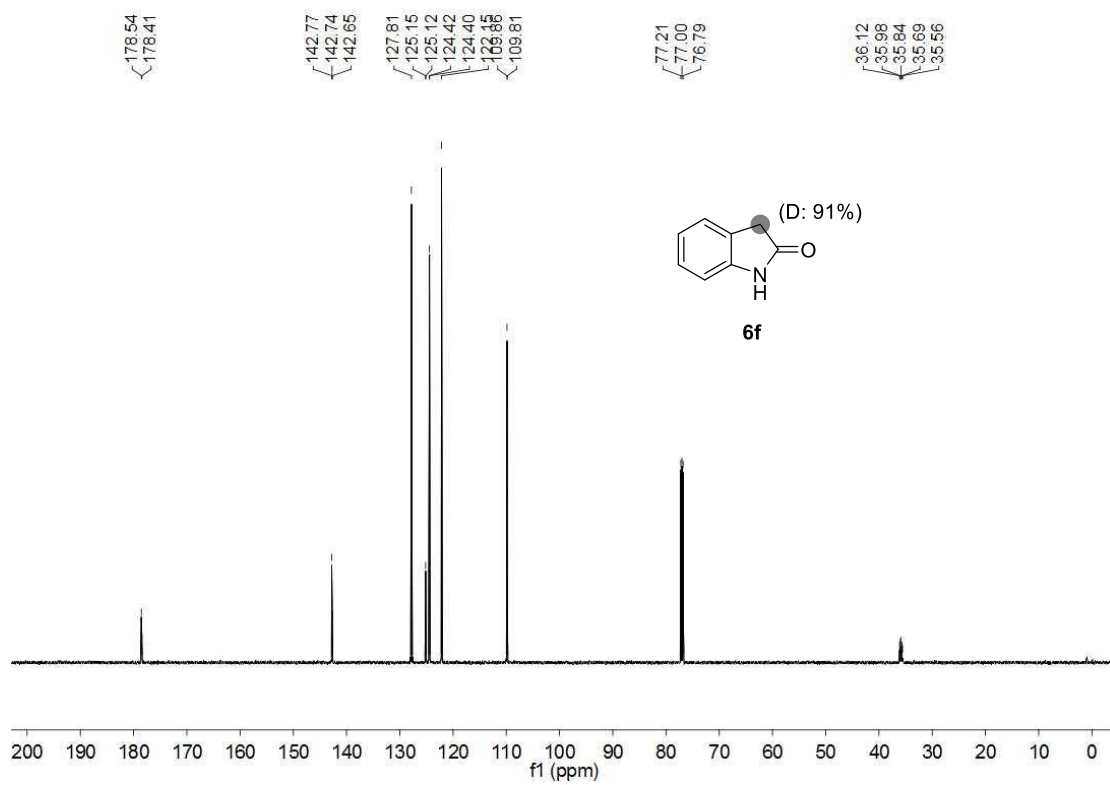

Supplement: d0ra02358b1.pdf [file d0ra02358b1.pdf]
